# Supplementary material for: Validation and standardization of DNA extraction and library construction methods for metagenomics-based human fecal microbiome measurements
Source: PubMed Central journal article supplement (PMC8082873; doi:10.1186/s40168-021-01048-3), 2021-04-29
Supplement: 40168_2021_1048_MOESM1_ESM.pdf [file 40168_2021_1048_MOESM1_ESM.pdf]

## Validation and standardization of DNA extraction and library construction methods for metagenomics-based human fecal microbiome measurements

---

### Content

|                          |       |       |
|--------------------------|-------|-------|
| Supplementary Methods    | _____ | p. 2  |
| Supplementary Figures    | _____ | p. 8  |
| Supplementary Tables     | _____ | p. 38 |
| Supplementary References | _____ | p. 54 |

## Supplementary Methods

### Genome sequencing and assembly

For *Escherichia coli* strain NBRC 3301, *Akkermansia muciniphila* strain JCM 30893 and *Faecalibacterium prausnitzii* strain JCM 31915, extraction of DNA, sequencing library construction, sequencing and genome assembly were performed as described by Tourlousse *et al.* (2020a, 2020b, 2020c, 2020d). Genome coverage of the short- and long-read libraries were in the range of 100–210× and 45–120×, respectively.

For *Cutibacterium acnes* subsp. *acnes* strain NBRC 107605<sup>T</sup>, *Bacillus subtilis* subsp. *subtilis* strain NBRC 13719<sup>T</sup>, *Streptococcus mutans* strain NBRC 13955<sup>T</sup>, *Lactobacillus delbrueckii* subsp. *delbrueckii* strain NBRC 3202<sup>T</sup>, short-read libraries were prepared using the TruSeq DNA PCR-Free kit and sequencing performed on a MiSeq instrument. For *Staphylococcus epidermidis* strain NBRC 100911<sup>T</sup>, the TruSeq DNA Nano kit was used for library construction and sequencing performed using a HiSeq instrument. Quality control of Illumina short reads was performed using CLC Genomic Workbench v8.5.1 (Qiagen). For all above strains, long-read libraries were generated with a Ligation Sequencing Kit (Oxford Nanopore technologies) and a GridION device used for sequencing. Combined genome coverage of the short- and long-read libraries exceeded 500× for all strains. Genome assembly was performed using Unicycler v0.4.4 (Wick *et al.*, 2017).

For *Bacteroides uniformis* strain NBRC 113350 and *Enterocloster clostridioforme* strain NBRC 113352, short-read libraries were prepared using the TruSeq DNA PCR-Free kit and sequencing performed on a MiSeq instrument. For *Bacteroides uniformis* strain NBRC 113350, long-read libraries were prepared using the SMRTBell Template Prep Kit 1.0 (PacBio) and a PacBio SMRT machine used for sequencing. For *Enterocloster clostridioforme* strain NBRC 113352, long-read libraries were generated with a Ligation Sequencing Kit (Oxford Nanopore technologies) and a GridION instrument used for sequencing. Quality control of Illumina short reads was performed using CLC Genomic Workbench v8.5.1 (Qiagen). Genome coverages were 140× and 340× for strains NBRC 113350 and NBRC 113352, respectively. Genome assembly was performed using Canu v1.7.1 (Koren *et al.*, 2017) and Unicycler v0.4.4.

Quality of all genomes was confirmed by CheckM v1.0.18 (Parks *et al.*, 2015) based on genome completeness, contamination, and coding density.

### Description of protocol P

Protocol P is an in-house phenol-chloroform based method for DNA extraction and was performed as follows. Fecal sample was resuspended in 300 µl of 100 mM NaH<sub>2</sub>PO<sub>4</sub> (pH 8.0), 300 µl of lysis buffer (100 mM of NaCl, 500 mM of Tris-HCl, 10% of sodium dodecyl sulfate, pH 8.0) and 300 µl of phenol-chloroform-isoamyl alcohol

(PCI, 25:24:1, v:v:v), and 1.2 g of 0.1-mm autoclaved Zirconia beads added. Cell lysis was performed by bead-beating using the FastPrep-24 instrument for 40 s or 60 s at a speed of 6 m/s. Following incubation for 10 min at 60 °C, the sample was centrifuged for 5 min at 14,000 ×g and 600 µl of supernatant recovered. If applicable, 0.01 volumes of RNase A (10 mg/ml) were added, and RNA digested for 10 min at 37 °C. An equal volume of PCI was then added, the sample mixed by vortexing, centrifuged for 3 min and the supernatant recovered. These steps were repeated two times. Subsequently, an equal volume of chloroform-isoamyl alcohol (24:1, v/v) was added, the sample vigorously mixed by vortexing and the aqueous phase recovered after centrifugation. Precipitation of DNA was performed by addition of 0.1 volumes of 3 M sodium acetate (pH 5.2) and an equal volume of isopropanol, followed by centrifugation for 30 min at 4 °C. The DNA pellet was washed with 70% ethanol, air dried and dissolved in EB buffer (Qiagen).

### Distance-based analysis of variance

To obtain estimates of intermediate precision and interlaboratory reproducibility, we performed distance-based analysis of variance (ANOVA), as outlined below. Note that in the following example, an interlaboratory study is considered but an identical approach applies to the assessment of intermediate precision with a single factor (as performed in this study).

Consider an interlaboratory study in which a single sample is analyzed by  $p$  laboratories, each performing  $n$  measurements under repeatability conditions. Note that in our study, each laboratory performed the same number of measurements such that the ANOVA model was balanced. As for traditional univariate ANOVA, variance components were obtained based on the within- and between- group sums of squares, with the difference that the Aitchison distance ( $d_A$ ) was used to obtain the required sum of squares.

More specifically, the within- and between-group total sums of squares (denoted by  $TSS_w$  and  $TSS_b$ ) were obtained as follows:

$$TSS_w = \sum_{j=1}^n \sum_{i=1}^p d_A^2(x_{ij}, cen(X_i))$$

$$TSS_b = n \cdot \sum_{i=1}^p d_A^2(cen(X_i), cen(X_{ij}))$$

where  $x_{ij}$  denotes individual measurement result  $j$  of laboratory  $i$ ,  $cen(X_i)$  is the compositional mean (group mean) of all measurements results of laboratory  $i$ , and  $cen(X_{ij})$  is the compositional mean (grand mean) of all measurement results.

Based on the degrees of freedom for each of the total sum of squares, the mean sums of squares (MSS) were then obtained as:

$$MSS_w = \frac{TSS_w}{p(n-1)}$$

$$MSS_b = \frac{TSS_b}{p-1}$$

with expected values of the mean sums of squares given by:

$$E(MSS_w) = \sigma_r^2$$

$$E(MSS_b) = \sigma_r^2 + n \cdot \sigma_L^2$$

where  $\sigma_r^2$  is the residual (that is, technical) population variance and  $\sigma_L^2$  is the population variance due to varying laboratories. The repeatability sample variance  $s_r^2$ , laboratory sample variance  $s_L^2$ , and reproducibility sample variance  $s_R^2$  were then obtained based on the mean sums of squares as follows:

$$s_r^2 = MSS_w$$

$$s_L^2 = \left(\frac{1}{n}\right)MSS_b - \left(\frac{1}{n}\right)MSS_w$$

$$s_R^2 = s_r^2 + s_L^2 = \left(\frac{1}{n}\right)MSS_b + \left(\frac{n-1}{n}\right)MSS_w$$

or, in terms of metric variances:

$$mvar_r = MSS_w$$

$$mvar_L = \left(\frac{1}{n}\right)MSS_b - \left(\frac{1}{n}\right)MSS_w$$

$$mvar_R = mvar_r + mvar_L = \left(\frac{1}{n}\right)MSS_b + \left(\frac{n-1}{n}\right)MSS_w$$

Confidence intervals for the estimates of the variances were calculated using the critical values of the chi-square distribution  $\chi_v^2$  with the appropriate degrees of freedom  $v$ . For  $mvar_R$ , effective degrees of freedom  $v_R$  were obtained using the Welch-Satterthwaite equation (Satterthwaite, 1946; Welch, 1947):



$$v_R = \frac{(\text{mvar}_R)^2}{\frac{(\text{MSS}_b/n)^2}{p-1} + \frac{((n-1)\text{MSS}_w/n)^2}{p(n-1)}}$$

Confidential intervals for the variances are then given by:

$$\text{mvar}_R \frac{v}{\chi_{v_R, 1-\alpha/2}^2} \leq \sigma_R^2 \leq \text{mvar}_R \frac{v}{\chi_{v_R, \alpha/2}^2}$$

$$\text{mvar}_R \frac{v}{\chi_{v_R, 1-\alpha/2}^2} \leq \sigma_R^2 \leq \text{mvar}_R \frac{v}{\chi_{v_R, \alpha/2}^2}$$

### Setting acceptable levels of error for trueness/accuracy

To guide future development of SOPs and routine quality management, we set target values for the acceptable level of errors for metagenomics-based measurement of the mock community. Here, error refers to the differences between measured compositions and the “ground truth”, determined based on DNA quantification by fluorometry for the DNA mock community and total DNA content quantification by acid-catalyzed depurination and quantification of released adenine content by HPLC, as described in the Methods, for the cell mock community. In short, we used simulations to account for the “uncertainty” in value assignments for the “ground truth” and metagenomics-based measurements. The acceptable level of error was then computed as the 95<sup>th</sup> percentile of the differences between both sets of simulated compositions, as detailed below:

**DNA mock community.** The acceptable level of error for the DNA mock community was set by considering differences between the “ground truth” and values determined by metagenome sequencing of libraries constructed by PCR-free methods using physical DNA fragmentation (protocols A0, C0, D0 and E0 in Table S2).

For the DNA fluorometric measurements, a type B uncertainty in the value assignments was considered, by assuming that measured DNA concentrations were normally distributed around the mean of replicated fluorometric measurements, with a standard deviation of 0.25 (equivalent to a coefficient of variation of 5%). Based on the “ground truth” value and type B uncertainty, 10,000 values (that is, DNA concentrations) were simulated for 20 strains using the function *rnorm* in R’s stat package, simulated values combined and normalized to 100%.

For the metagenome sequencing based measurements, the closed geometric mean of measurements performed by each of the protocols (averaged across three technical replicates) was assigned as value. A type A uncertainty was then considered based on the variance matrix of the means across replicates for each protocol, computed using the

function *var.acomp* function in the R package *compositions* (van den Boogaart *et al.*, 2020). Based on the mean and variance matrix (considering only its diagonal), we then simulated 10,000 random compositions using *rnorm.acomp*.

We then calculated the geometric mean and maximum of absolute fold differences (AFD) between 10,000 pairs from the above two simulated compositions. Finally, the acceptable level of error was defined as the 95<sup>th</sup> percentile of the 10,000 mean and maximum values of the AFDs.

R code for these calculations is provided below:

```
# simulation of 10,000 compositions considering the type B uncertainty in the measured DNA concentrations #

simulatedB <- NULL

for(i in strains) {
  simulatedB <- rbind(simulatedB,
    data.frame(strainID = i, value = rnorm(10^4,5,0.25)) %>%
    dplyr::mutate(id = paste0("sim", 1:n())))
}

simulatedB <- simulatedB %>%
  dplyr::group_by(id) %>%
  dplyr::mutate(value = value / sum(value)) %>%
  reshape2::dcast(id ~ strainID, value.var = "value") %>%
  dplyr::select(-id)

# simulation of 10,000 compositions considering the type A uncertainty in the measured compositions using protocols A0, C0, D0 and E0 #

## calculation of per-protocol closed geometric centres ##

centres <- df %>%
  dplyr::group_by(protocolID, strainID) %>%
  dplyr::summarise(abundanceMeasured = exp(mean(log(abundanceMeasured)))) %>%
  dplyr::ungroup() %>%
  dplyr::group_by(protocolID) %>%
  dplyr::mutate(abundanceMeasured = abundanceMeasured / sum(abundanceMeasured)) %>%
  reshape2::dcast(protocolID ~ strainID, value.var = "abundanceMeasured") %>%
  dplyr::select(-protocolID)

## calculation per-protocol compositional centres ##

m <- apply(centers, 2, function(x) exp(mean(log(x))))
m <- m / sum(m)

## calculation co-variance matrix of centres for simulations, only using diagonals ##

v <- diag(diag(var.acomp(acomp(centers))))

## simulation of 10,000 compositions ##

simulatedA <- compositions::rnorm.acomp(10^4, m, v)

## random selection of compositions from simulatedB and simulatedA and calculation of the geometric mean and maximum of absolute fold differences ##

dist1 <- vector()
dist2 <- vector()

for(i in 1:10^4) {
  tmp1 <- as.vector(sims[i])
  tmp2 <- unname(unlist(refs[i,]))
  dist1 <- append(dist1,PKNCA::geomean(exp(abs(log(tmp1/tmp2))))))
  dist2 <- append(dist2,max(exp(abs(log(tmp1/tmp2))))))
}

## setting acceptable levels based on 95% percentiles ##

round(quantile(dist1, probs = c(95/100)),2)
round(quantile(dist2, probs = c(95/100)),2)
```

**Cell mock community.** For the cell mock community, the acceptable level of error was set by considering differences between the “ground truth” and values determined by metagenome sequencing of libraries constructed

from DNA extracted by protocols P and Q, followed by library construction using protocol BL. For the HPLC measurements, a 10% type A uncertainty was considered.

## Supplementary Figures

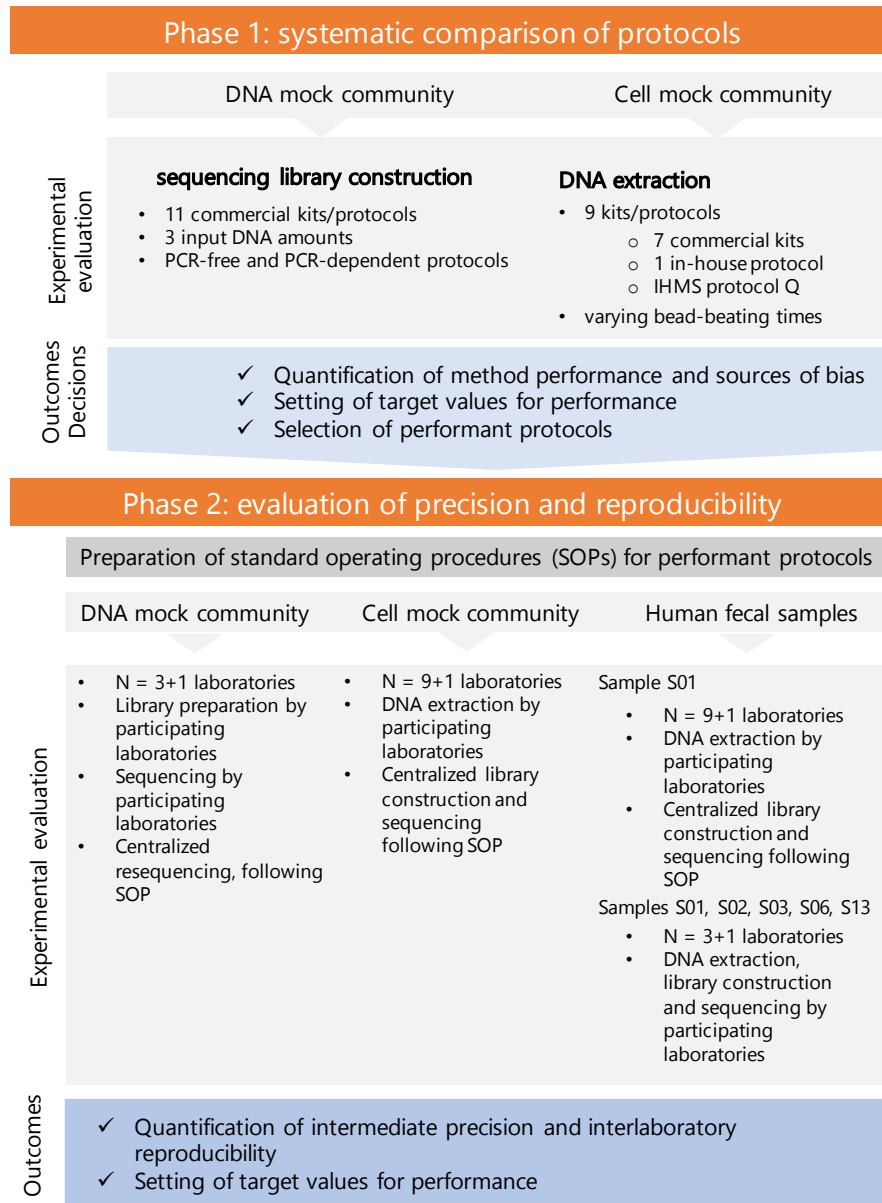

**Supplementary Figure S1.** Schematic of the design of this study. In the first phase, a wide range of protocols for DNA extraction and library construction were evaluated using defined mock communities, leading to: (i) ranking of protocols based on analytical performance (that is, agreement to the “ground truth” values) and considerations related to hands-on time, cost, *etc.*, (ii) identification of main sources of quantitative bias, and (iii) establishment of target values for key performance metrics. In the second phase, SOPs were established for highly performant protocols and evaluated with respect to variability of measurement results within a single laboratory (that is, intermediate precision) and across multiple laboratories (interlaboratory reproducibility), using mock communities and human fecal samples, leading to (i) quantification of measurement variability and (ii) establishment of target values for key performance metrics. Detailed experimental schemes for assessment of intermediate precision and interlaboratory reproducibility are provided in Fig. S13.

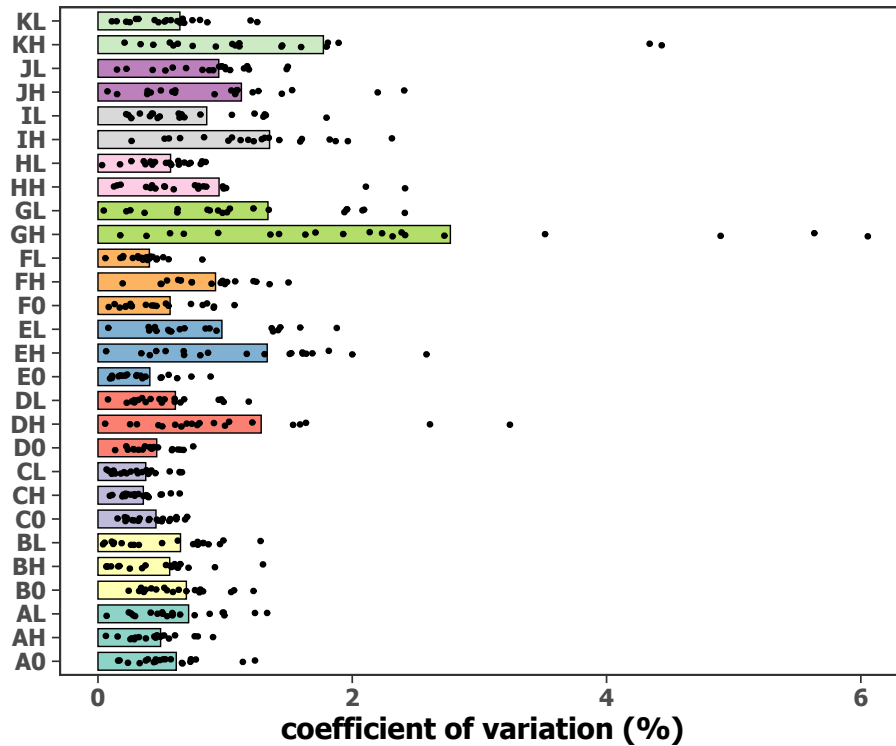

**Supplementary Figure S2.** Repeatability of protocols for sequencing library construction as evaluated using the DNA mock community. Bar heights represent the quadratic mean of strain-wise coefficients of variation (qmCV, see Methods for details) of measured relative abundances across three technical replicates for each protocol. Black symbols show coefficients of variation for individual strains.

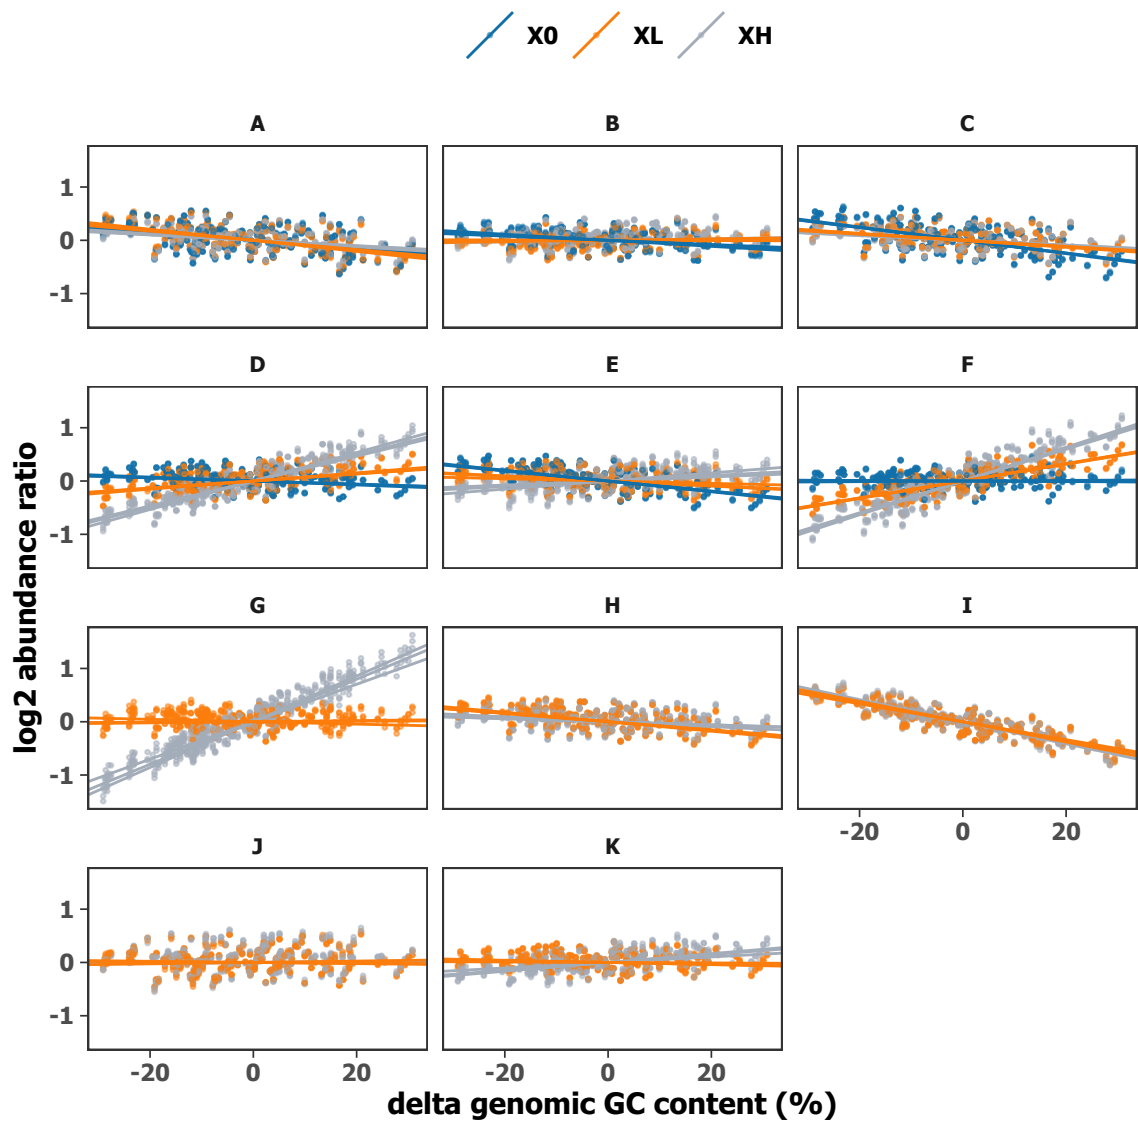

**Supplementary Figure S3.** Quantification of GC bias. Each data point represents a pair of strains/genomes, with their difference in genomic GC content plotted on the x-axis and log<sub>2</sub>-fold-difference in relative abundance plotted on the y-axis. Solid lines show the intercept-free linear regression fits for each of the three technical replicates per protocol, generated using the function `lm` in R's stats package. Facets represent different kits and colors reflect varying DNA input amounts and associated conditions for library amplification by PCR (X0, XL and XH). Calculated slopes were used as an overall measure of GC bias and shown in Fig. 1 in the main text.

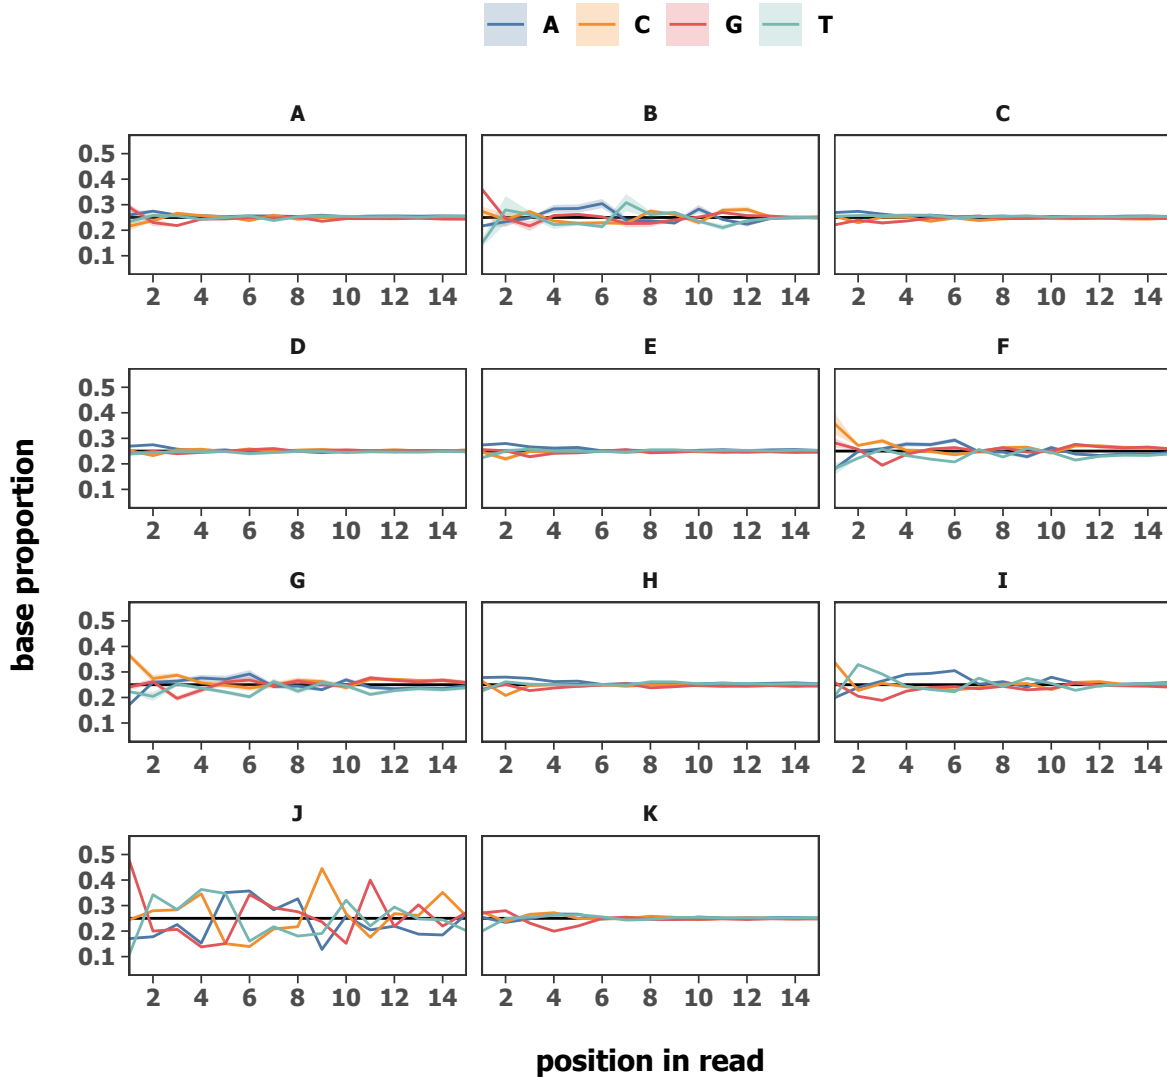

**Supplementary Figure S4.** Visualization of fragmentation bias introduced during sequencing library construction as evaluated using the DNA mock community. Plots show the base composition for the first 15 cycles of the forward sequencing read, prior to quality trimming. Data are shown as the mean (solid lines) and standard deviation (ribbons, if visible) across different DNA input amounts and three technical replicates for each kit. Per-position base contents were obtained from fastp's json output files. The black horizontal line shows the theoretically expected even base content calculated based on the reference genome sequences.

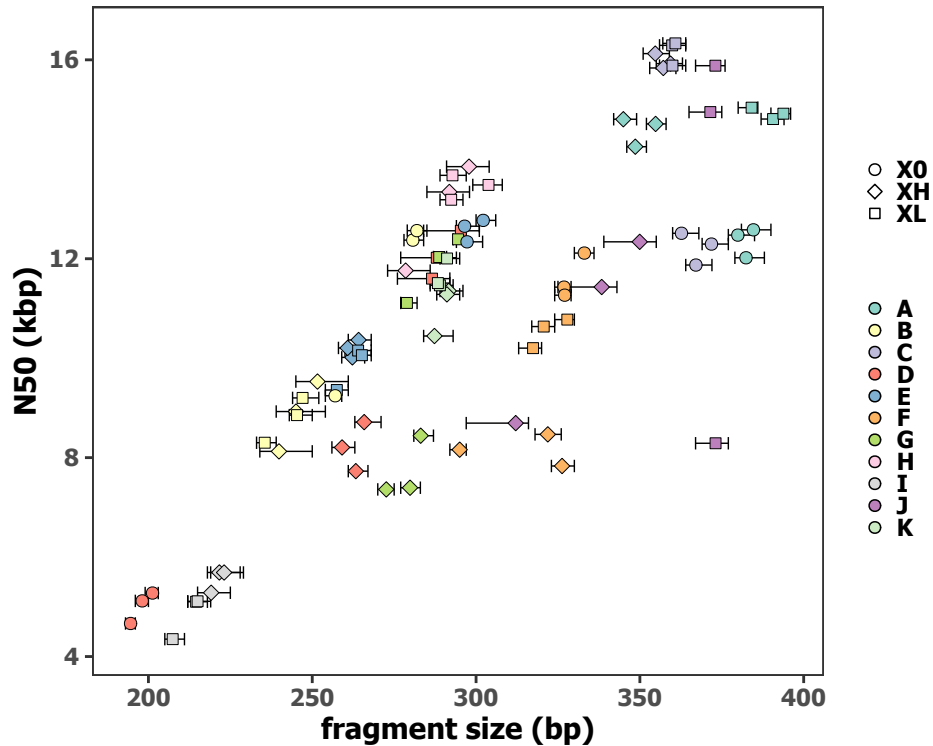

**Supplementary Figure S5.** Relationship between sequencing library fragment size and N50 values of metagenome assemblies as evaluated using the DNA mock community. For each library, a random set of two million quality-controlled reads pairs were assembled using MEGAHIT. Fragment sizes were estimated by mapping quality-controlled reads against the reference genome sequences using bowtie2 and parsing generated SAM files using samtools and BBDMap's reformat.sh script. For the x-axis, symbols represent the mean of strain-wise median fragment sizes for individual sequencing library (three per protocol) and error bars represent the range of per-library strain-wise median fragment sizes.



a

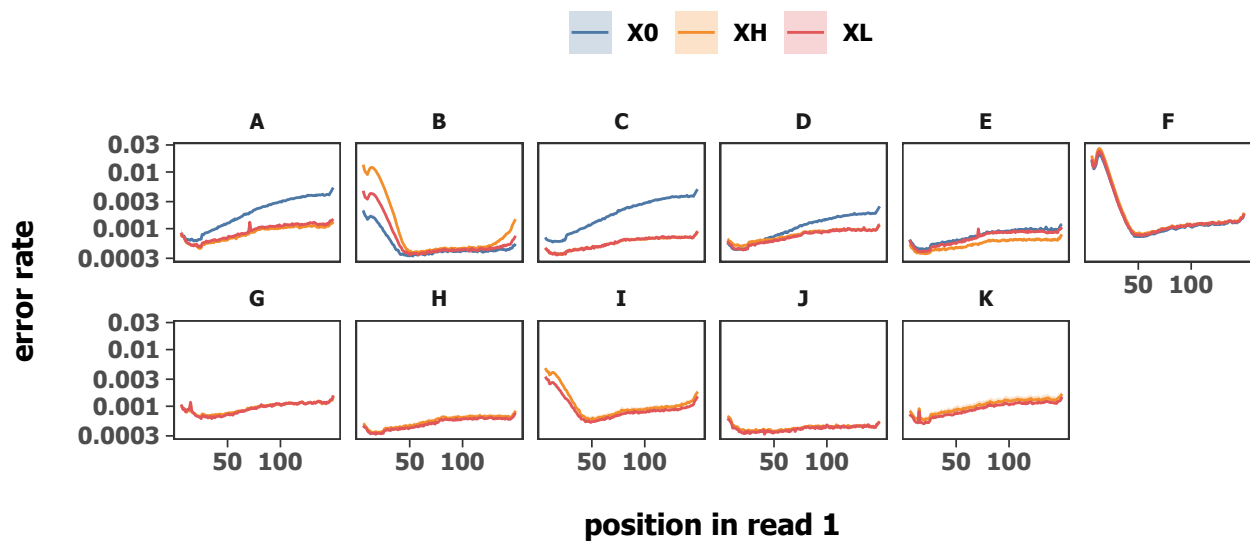

b

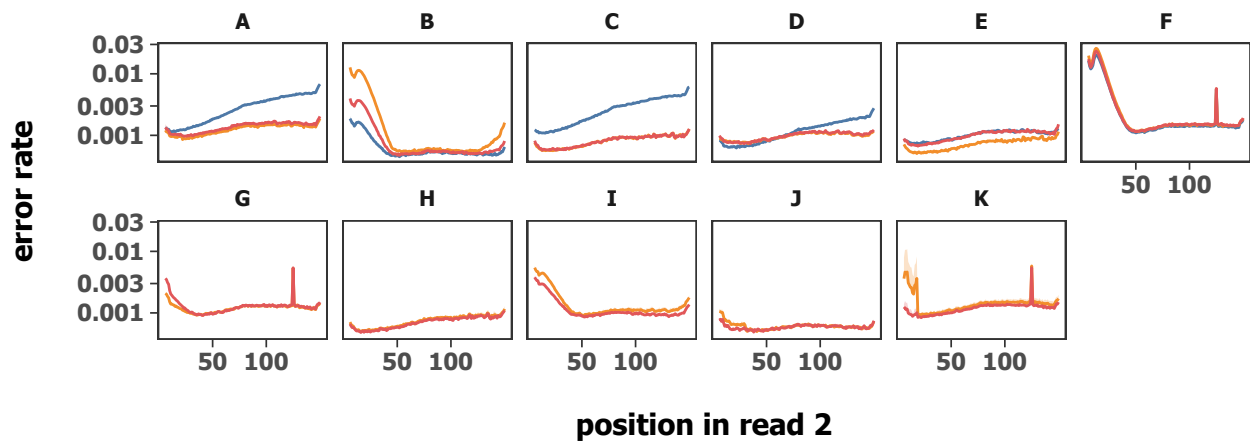

**Supplementary Figure S6.** Variation in base call error rates across protocols for sequencing library construction as evaluated using the DNA mock community. Error rates were estimated by mapping quality-controlled reads against the reference genome sequences using bowtie2 and parsing generated SAM files using samtools and BMap's reformat.sh script. A total of two million read pairs per library were analyzed and data represent the mean (solid lines) and standard deviation (ribbons, if visible) of base cell error rates for technical replicates for each protocol. Per-position error rates were calculated as the mean across strains. Panels a and b show data for reads 1 (forward) and 2 (reverse), respectively. Facets represent different kits (A-K) and colors represent different DNA input amounts (X0, XL and XH).

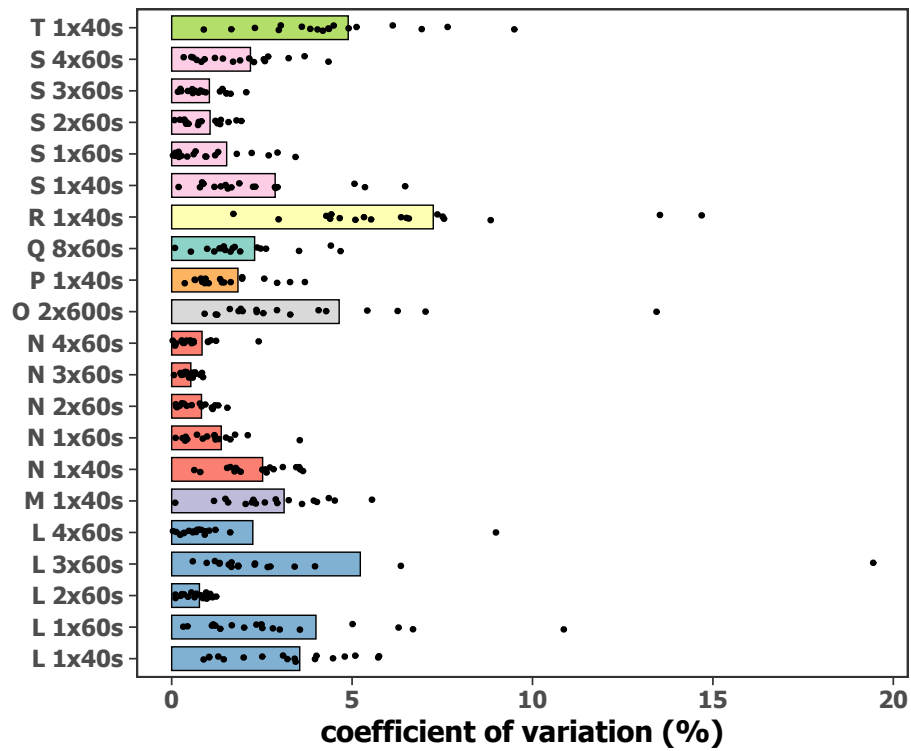

**Supplementary Figure S7.** Repeatability of protocols for DNA extraction, as evaluated using the cell mock community. Bar heights represent the quadratic mean of strain-wise coefficients of variation (that is, qmCV) of measured relative abundances across two or three technical replicates. Black symbols show coefficients of variation for individual strains. Labels on the y-axis consist of kit identifiers and bead-beating regimes (cycles x seconds per cycle), separated by a space.

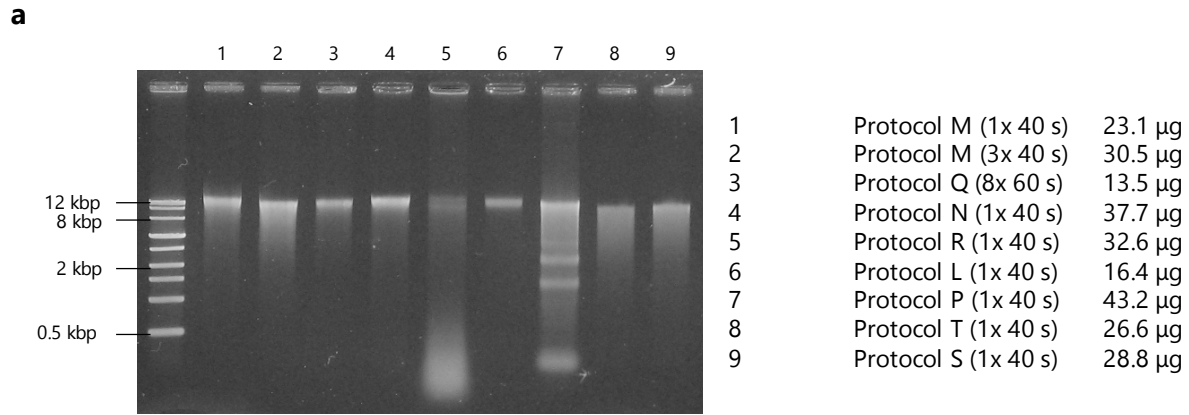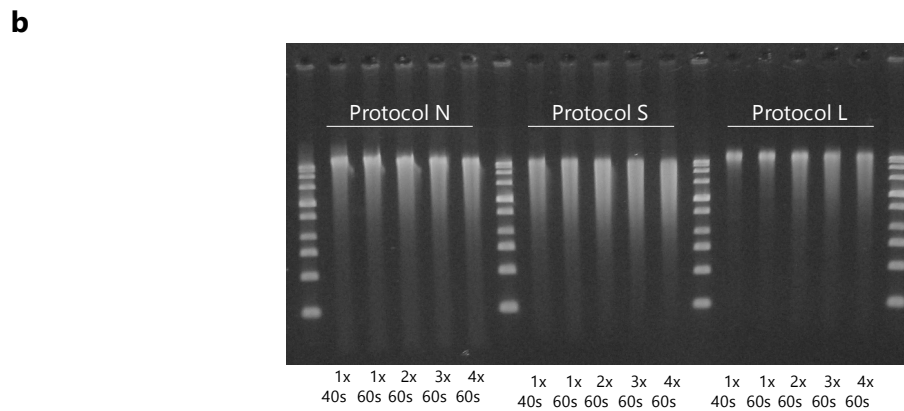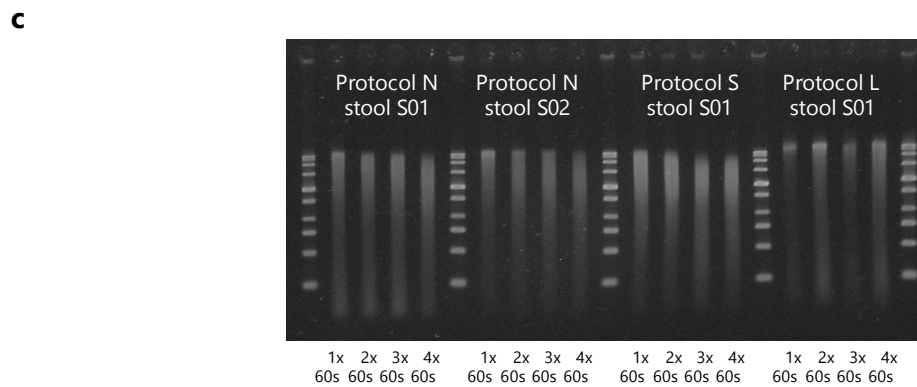

**Supplementary Figure S8.** (a) Inspection of DNA extracted from the cell mock community using different kits and bead-beating regimes (indicated between brackets in the accompanying table). DNA yields were measured using the Qubit dsDNA Assay Kit and Qubit 3 fluorometer. Note that for protocol P, RNase treatment was not performed, leading to visible rRNA/mRNA bands. (b, c) Evaluation of the effect of bead-beating regime on the size distribution of extracted DNA for the cell mock community (b) and fecal sample(s) (c). In all cases, extracted DNA was run on 1% agarose gels, stained with GelRed nucleic acid stain and a Perfect DNA Markers, 0.5-12 kbp (NovaGen) used as size marker for all gels.

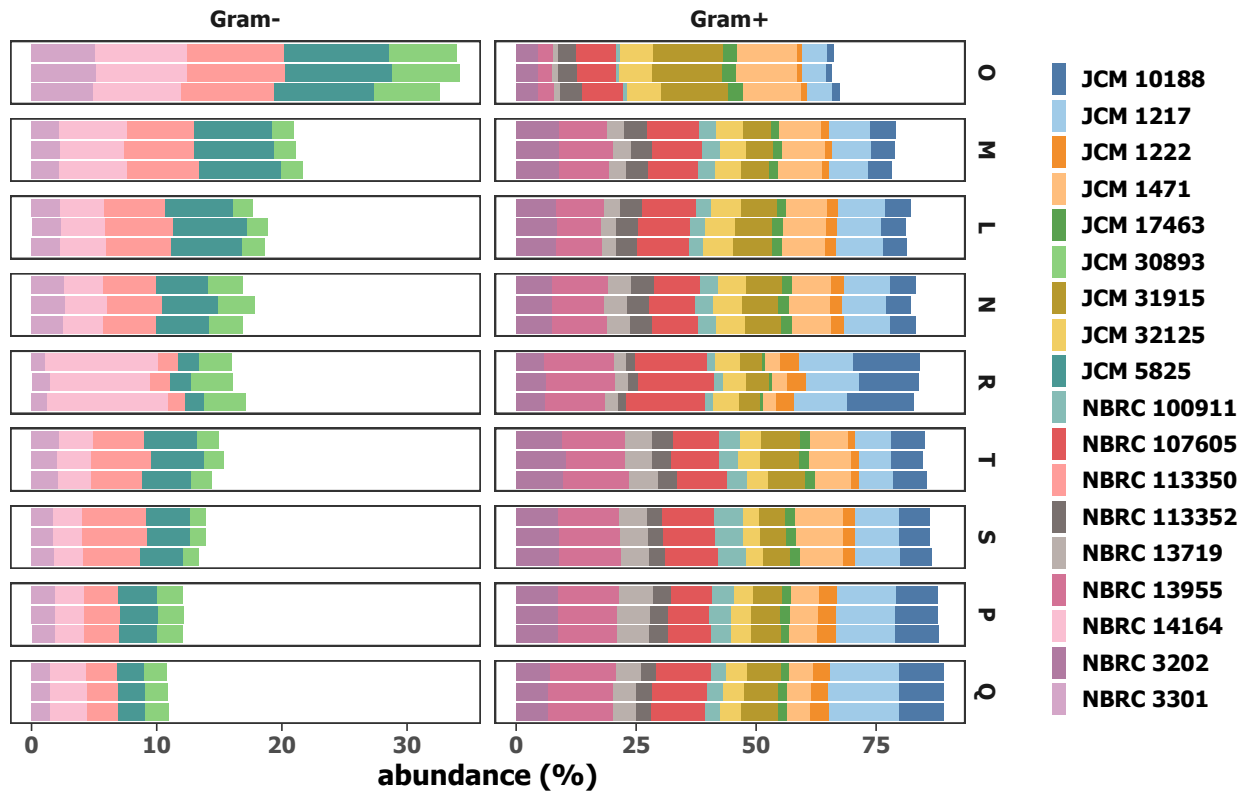

**Supplementary Figure S9.** Strain-wise relative abundances for the cell mock community processed using different protocols for DNA extraction. Each facet shows the results of three technical replicates. A constant bead-beating regime of  $1 \times 40$  s was used, except for protocols Q ( $8 \times 60$  s) and protocol O ( $2 \times 600$  s). Facets are sorted row-wise according to the total proportion of Gram-positives and Gram-negatives.

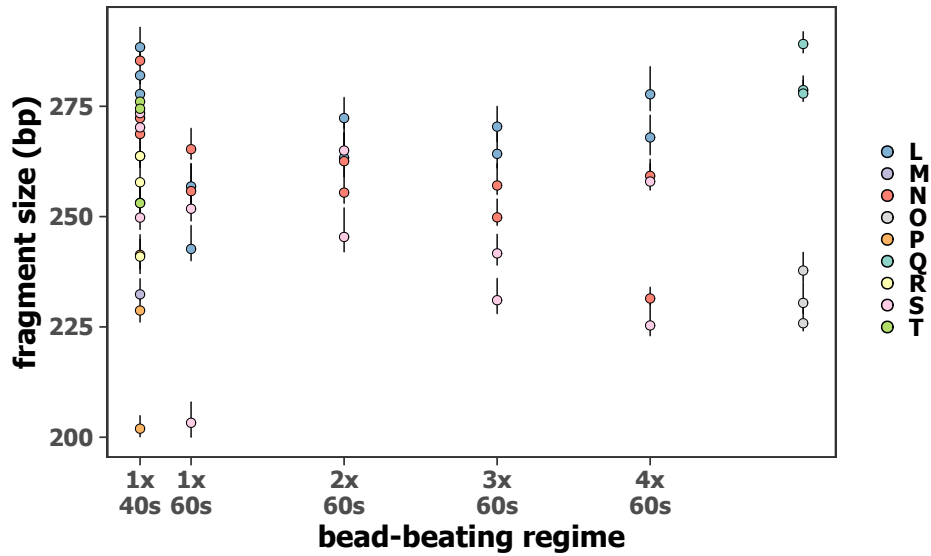

**Supplementary Figure S10.** Effect of bead-beating regime on library fragment size for the cell mock community. Fragment sizes were estimated by mapping of quality-controlled reads against the reference genome sequences using bowtie2 and parsing generated SAM files using samtools and BBDMap's reformat.sh script. For the *y*-axis, symbols represent the mean of strain-wise median fragment sizes for each library and error bars represent the range of strain-wise median fragment sizes for each library.

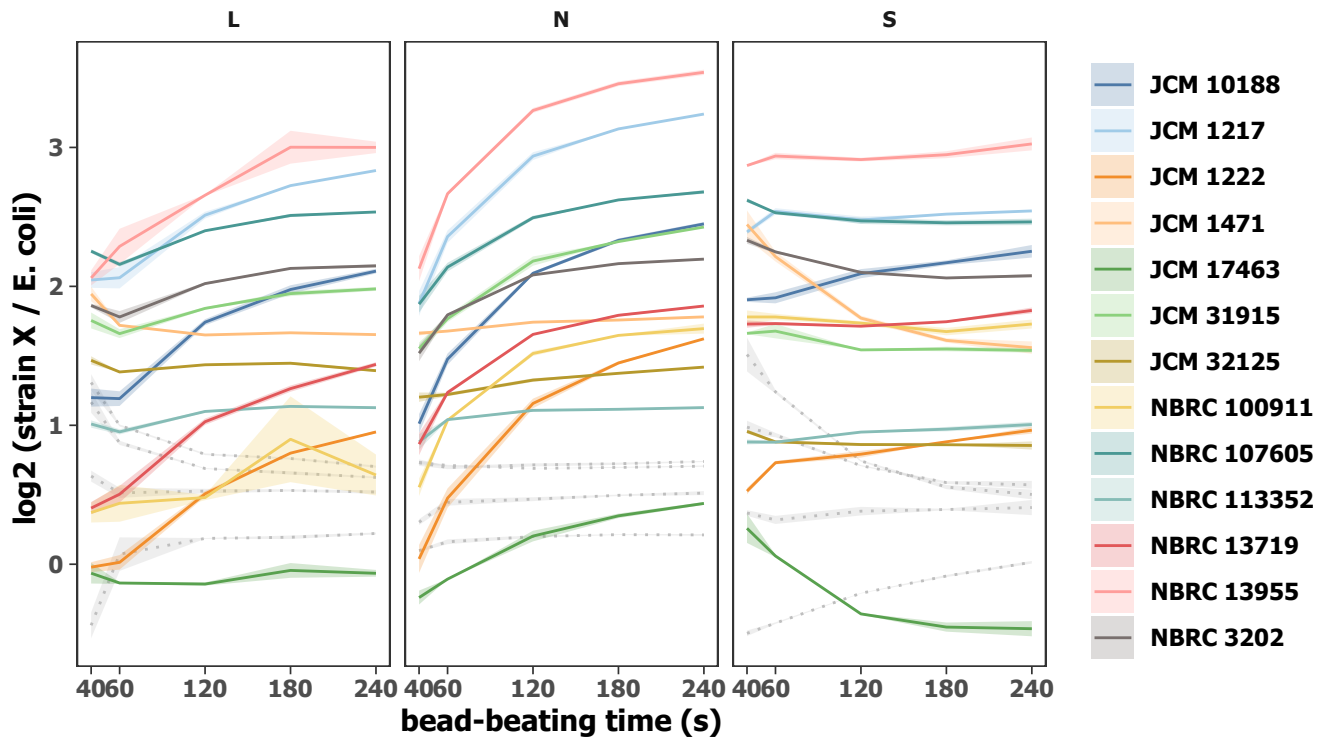

**Supplementary Figure S11.** Effect of bead-beating regime on the observed abundance of individual strains, relative to *E. coli*. All Gram-negatives are shown as dotted grey lines. Data represent the mean (lines) and standard deviation (ribbons, if visible) of two or three technical replicates. Note that data for protocol N are also shown in Fig. 2 in the main text.

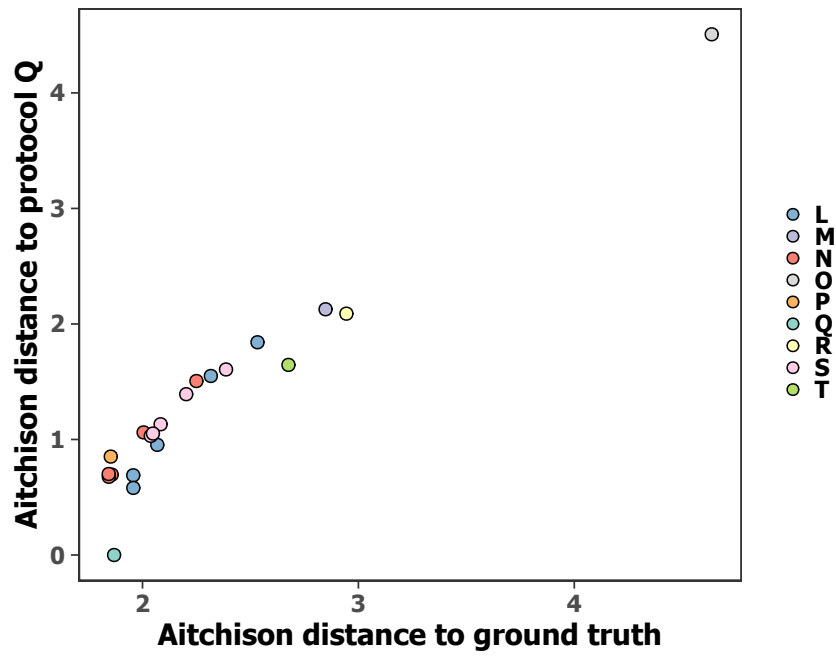

**Supplementary Figure S12.** Relationship between Aitchison distance to the “ground truth” as determined based on total DNA content ( $x$ -axis) and to protocol Q ( $y$ -axis) for ranking of protocols for DNA extractions. The Spearman's rank correlation coefficient is 0.93, showing consistent ranking of protocols. Values for protocol Q were calculated as the closed geometric mean of three technical replicates.

**a**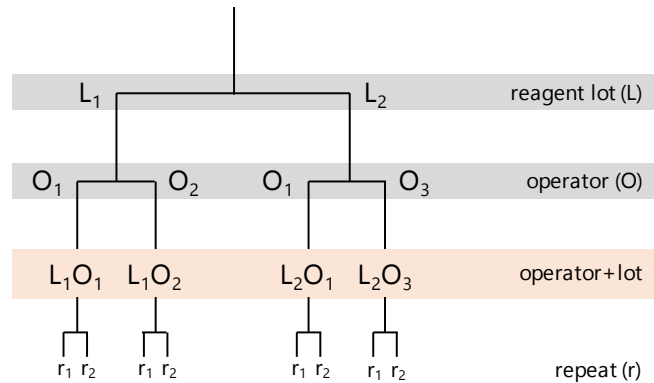**b**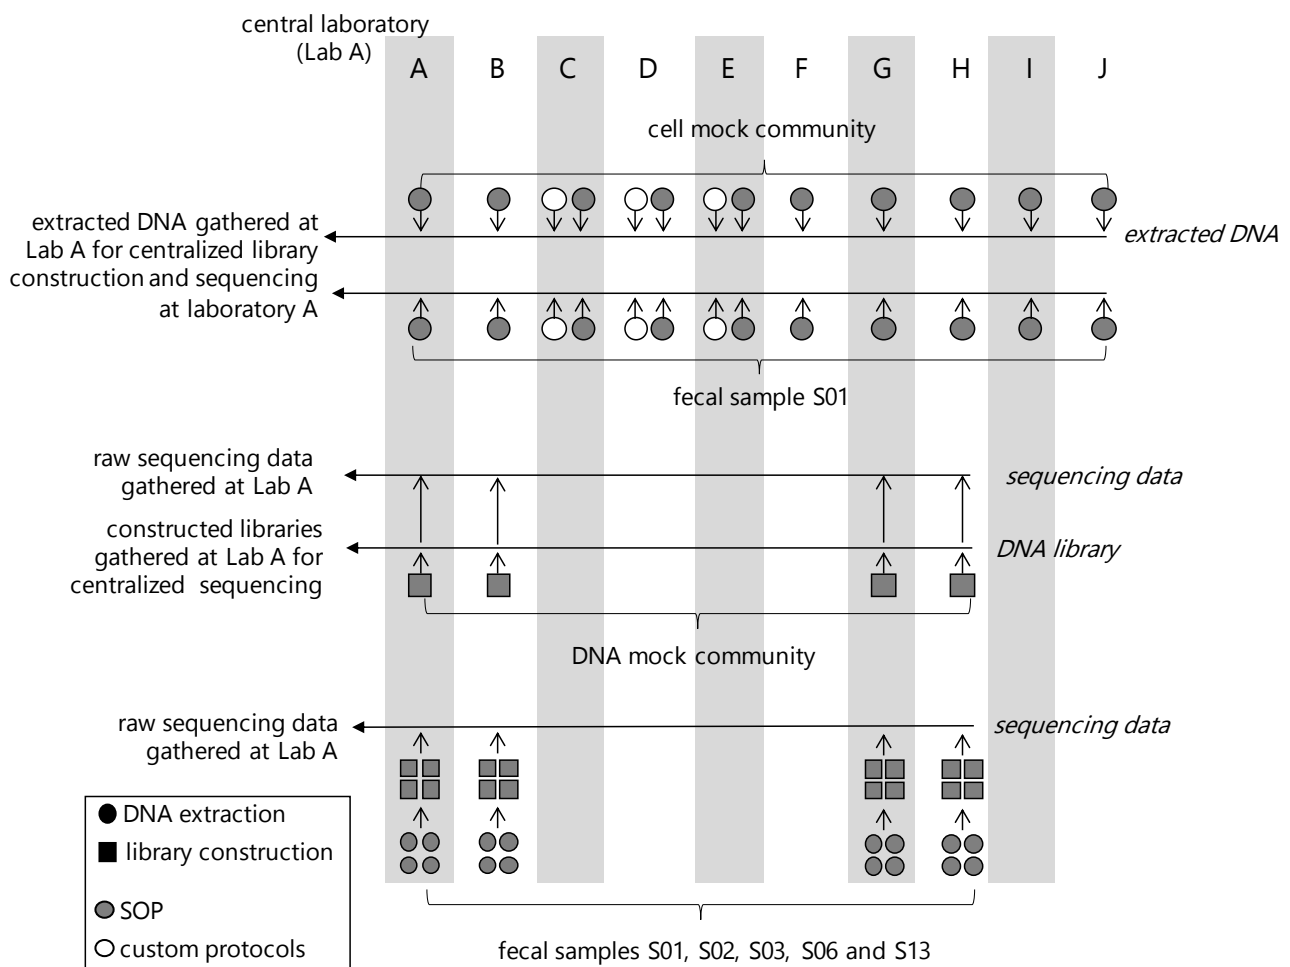

**Supplementary Figure S13.** (a) Schematic of the experimental design for assessment of intermediate precision associated with varying operators and reagents lots. Based on the experimental design with limited number of operators and reagent lots, we evaluated intermediate precision of operator+lot combinations ( $n=4$ ), each with two measurements performed under repeatability conditions. (b) Schematic of the experimental design for assessment of interlaboratory reproducibility of DNA extraction (circles) and sequencing library construction (squares). All laboratories analyzed each of the samples in duplicate. To assess reproducibility of DNA extraction, DNA was



extracted by ten laboratories (that is, central laboratory Lab A and nine industry-based laboratories, designated B - J) from the cell mock community and fecal sample S01, and DNA gathered at the Lab A for centralized library preparation and sequencing. Three of the above nine industry-based laboratories also performed DNA extraction using a custom protocol. To assess reproducibility of library construction, sequencing libraries were constructed by four laboratories (that is, the central laboratory Lab A and three industry-based laboratories, designated B, G and H) from the DNA mock community, and DNA gathered at the Lab A for centralized sequencing. Laboratories B, G and H also performed sequencing at their own facilities and shared raw sequencing data with Lab A. Finally, Labs A, B, G and H also extracted DNA, prepared libraries, and generated sequencing data for fecal samples S01, S02, S03, S06 and S13; these data were analyzed at Lab A.

a

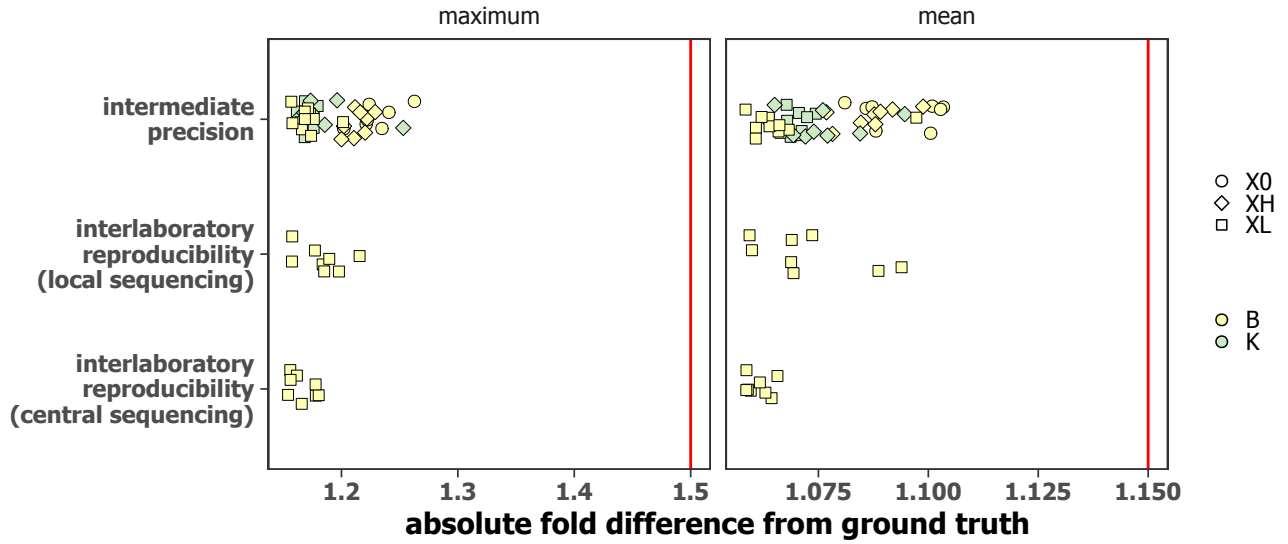

b

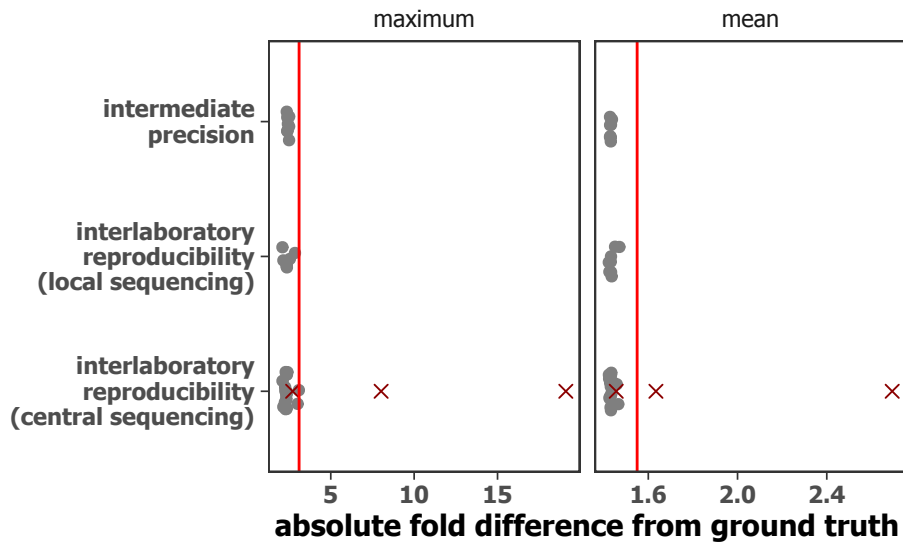

**Supplementary Figure S14.** Evaluation of accuracy (agreement of individual measurement results to the ground truth) generated as part of the intermediate precision and interlaboratory reproducibility studies. The vertical red lines show the thresholds for accuracy, in terms of geometric mean of strain-wise absolute fold errors and maximum of strain-wise fold errors to the ground truth (see Table S3). Panels a and b show data for the DNA and cell mock community, respectively. Custom protocols for DNA extraction in panel b are shown as red x symbols.

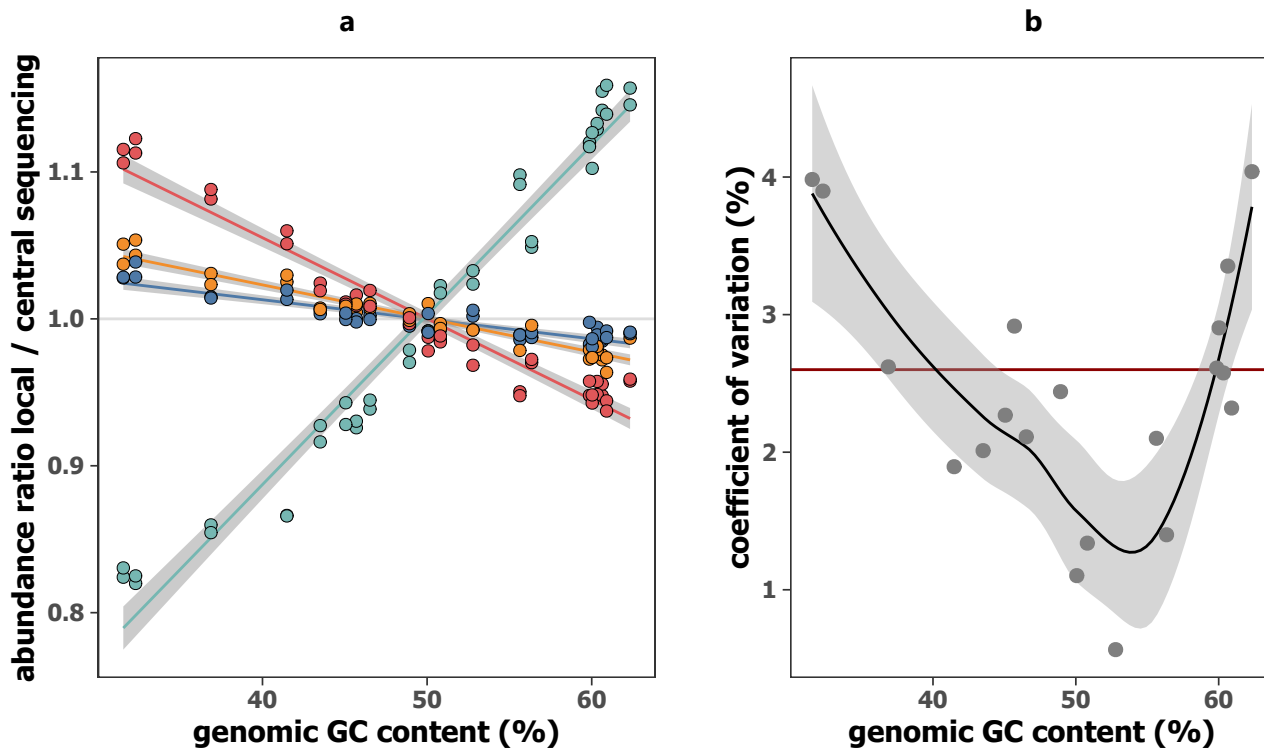

**Supplementary Figure S15.** (a) Illustration of GC-dependent bias associated with sequencing runs/platforms as observed in the interlaboratory study. The y-axis represents the ratio of the observed strain-wise abundances in sequencing data generated by the central laboratory and external laboratories (local). Data are for the DNA mock community, with sequencing libraries constructed using protocol BL. Colors represent four participating laboratories (that is, the central laboratory Lab A and three industry-based laboratories). Note that the laboratory with the highest bias used a NovaSeq platform (greenish color) while all other laboratories used a NextSeq 500/550 instrument. Data from the central laboratory Lab A shown in bluish color represent technical sequencing replicates. Symbols represent data from individual replicates ( $n=2$ ). The linear regression lines and confidence intervals were generated using ggplot2's `geom_smooth` function. (b) Evaluation of repeatability of sequencing by repeated sequencing ( $n=4$ ) of a single DNA mock community library (generated using protocol C0) in four different NextSeq 500 sequencing runs and its relationship to GC content. The red horizontal line represents the quadratic mean of strain-wise coefficients of variation (that is, qmCV). The smoothed trend line (generated using ggplot2's `geom_smooth` function) was added to visualize the U-shaped relationship between GC-content and between-sequencing-run variability in strain-wise abundances.

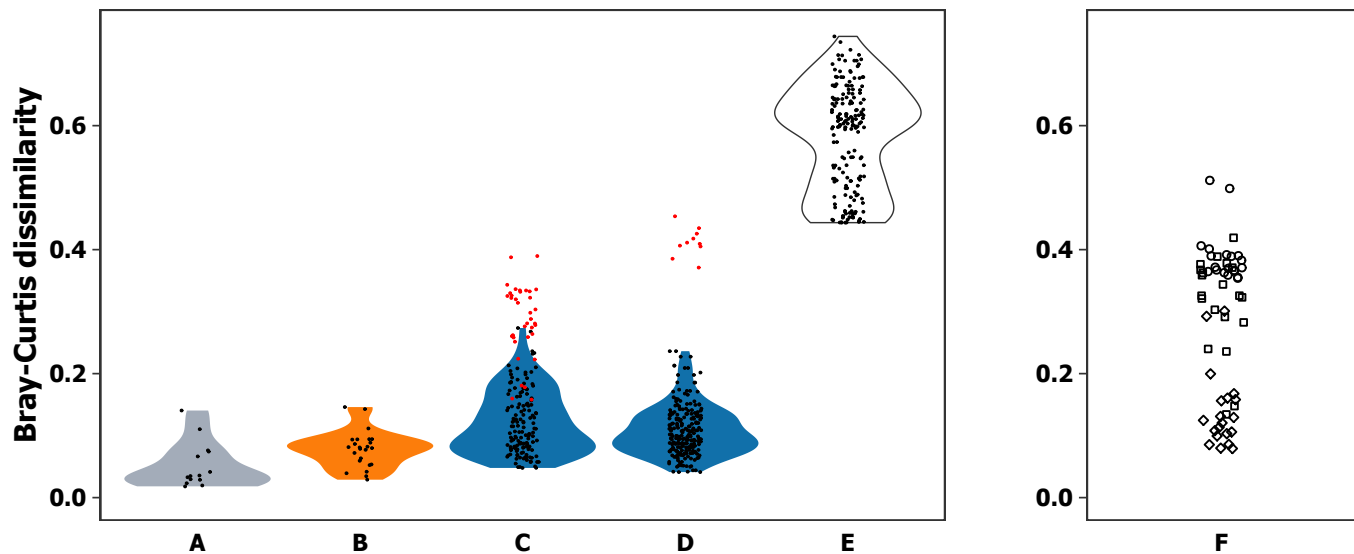

**Supplementary Figure S16.** Same as Fig. 3d in the main text, based on Bray-Curtis dissimilarities. Pairwise distances are calculated according to the categories on the x-axis: A: dissimilarities between replicated DNA extractions for the intermediate precision and interlaboratory reproducibility assessments; B: dissimilarities between (operator+lot)-different DNA extractions for the intermediate precision study; C: dissimilarities between (laboratory)-different DNA extractions for the interlaboratory reproducibility study; D: dissimilarities between (laboratory)-different data generation for the interlaboratory reproducibility study for samples S01-S16, with all steps from DNA extraction to sequencing performed by the participating laboratories; E: within-laboratory dissimilarities between different fecal samples; F: dissimilarities between custom DNA extraction protocols and protocol N for sample S01. Data from laboratories for which at least one the replicated measurements was considered as an outlier are shown in red (see Fig. S17).

a

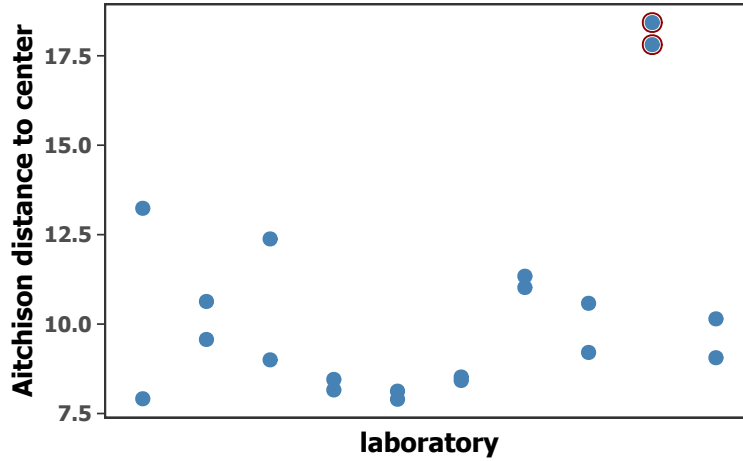

b

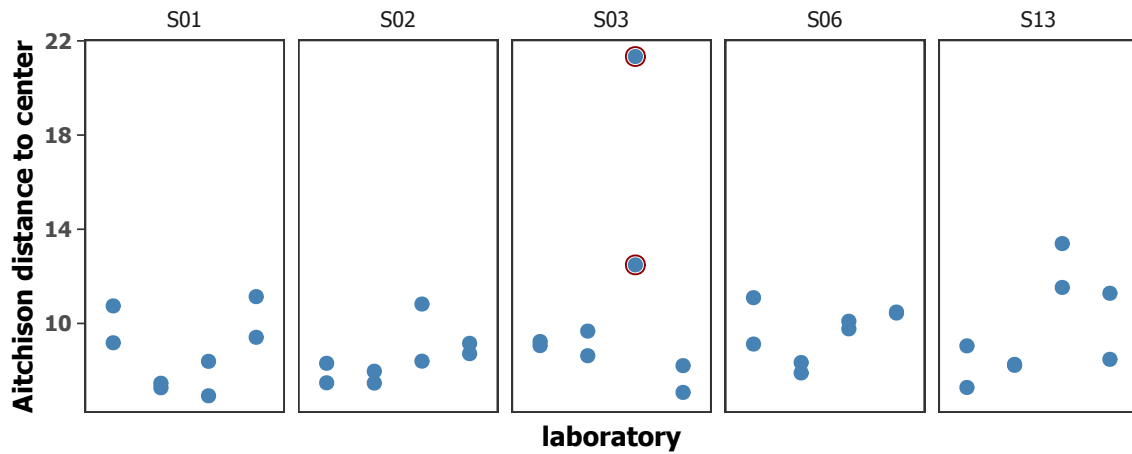

c

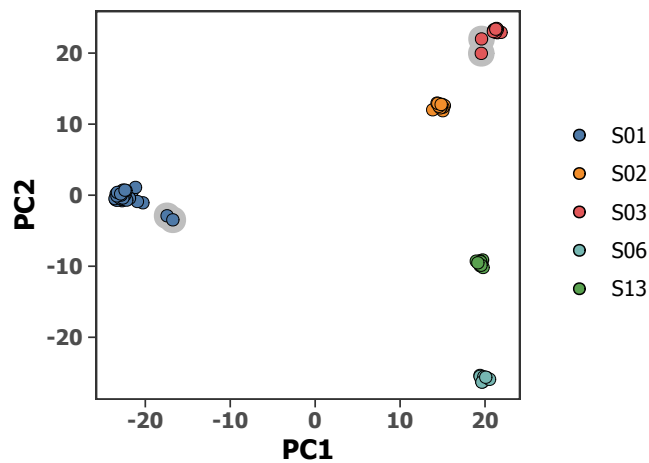

**Supplementary Figure S17.** Evaluation of outliers for assessment of interlaboratory reproducibility of DNA extraction from fecal sample S01 (panel a,  $n=10$  laboratories) and reproducibility of the full metagenomic analysis pipeline (that is, including DNA extraction, sequencing library construction and sequencing) for five fecal samples (panel b,  $n=4$  laboratories). Datapoints represent Aitchison distances to the geometric centre of

each dataset. Laboratories yielding outlying measurement results are marked by a red circle. Panel c shows a compositional PCA ordination plot (that is, based on Euclidean distances after clr transformation of relative abundances) with measurement results from outlying laboratories highlighted with a filled grey circle.

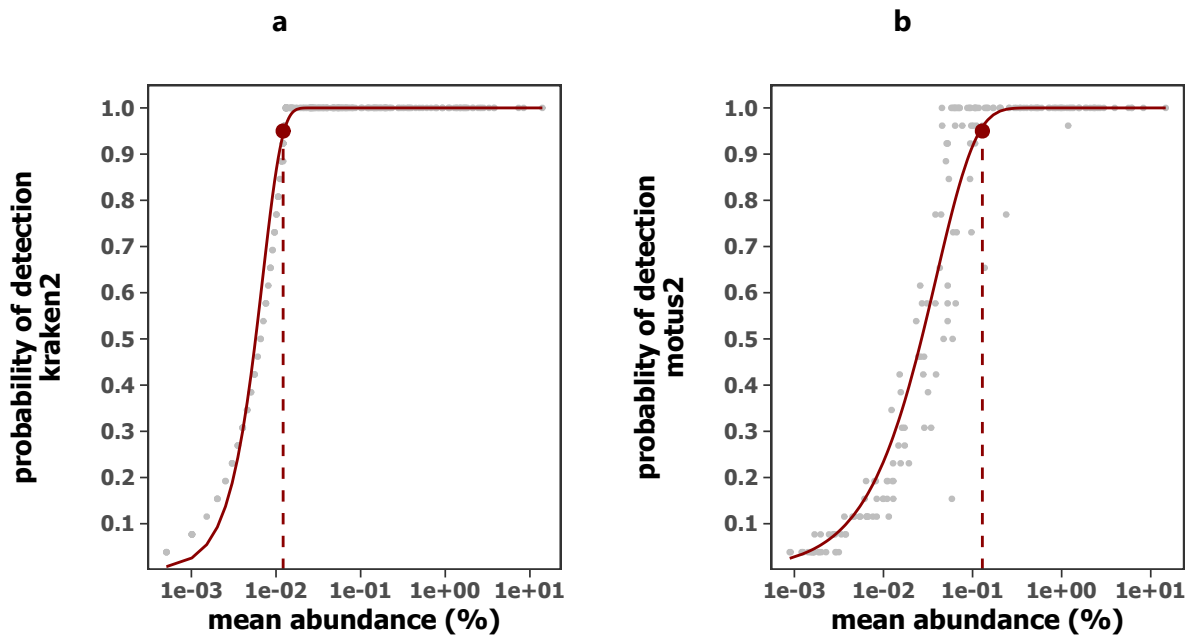

**Supplementary Figure S18.** Determination of the limit-of-detection (LOD) through regressing the probability of detection (POD) of each species/mOTU ( $y$ -axis) to its mean abundance ( $x$ -axis) across available measurement results for sample S01. A total of 26 datasets were included in the analysis, namely 8 data sets generated as part of the assessment of intermediate precision of DNA extraction, and 18 data sets generated as part of the assessment of interlaboratory reproducibility of DNA extraction after exclusion of outlying data (see Fig. S17). Panels a and b show data for kraken2 (species-level) and mOTUs2 (OTU level), respectively. The model was generated by regressing the POD to the mean abundance (log-transformed), using a generalized linear model with family binomial and complementary log-log (cloglog) link function using R stats' glm function. The vertical dashed red lines represent the estimated LODs, with a fitted POD of 95%.

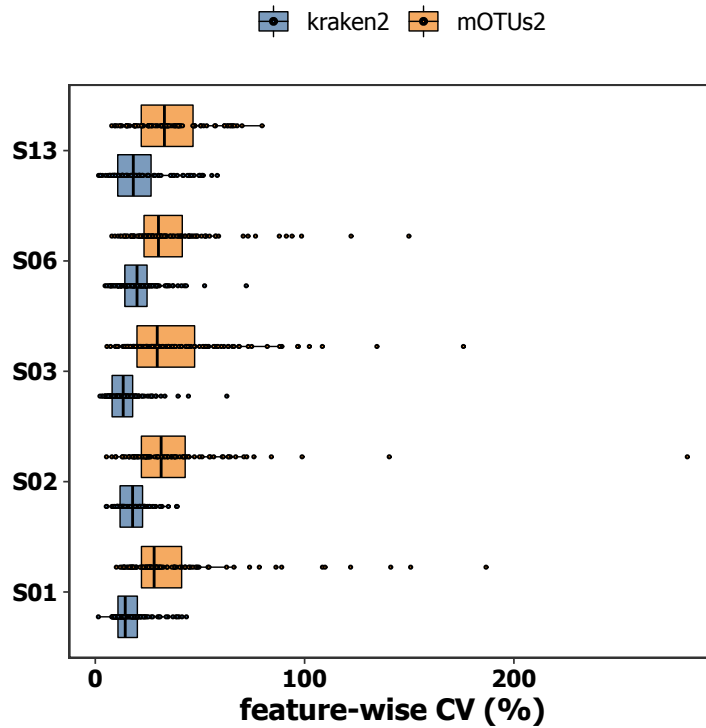

**Supplementary Figure S19.** Interlaboratory variation in species/mOTU abundances (feature-wise coefficient of variation, CV, %) across the entire measurement workflow, from DNA extraction to sequencing, based on data from four laboratories. Only features with a mean abundance of >0.05% were considered. Boxplots show the distribution of feature-wise coefficients of variation in observed abundances and were generated using ggplot2's geom\_boxplot function. Fill colors represent taxonomic profilers.



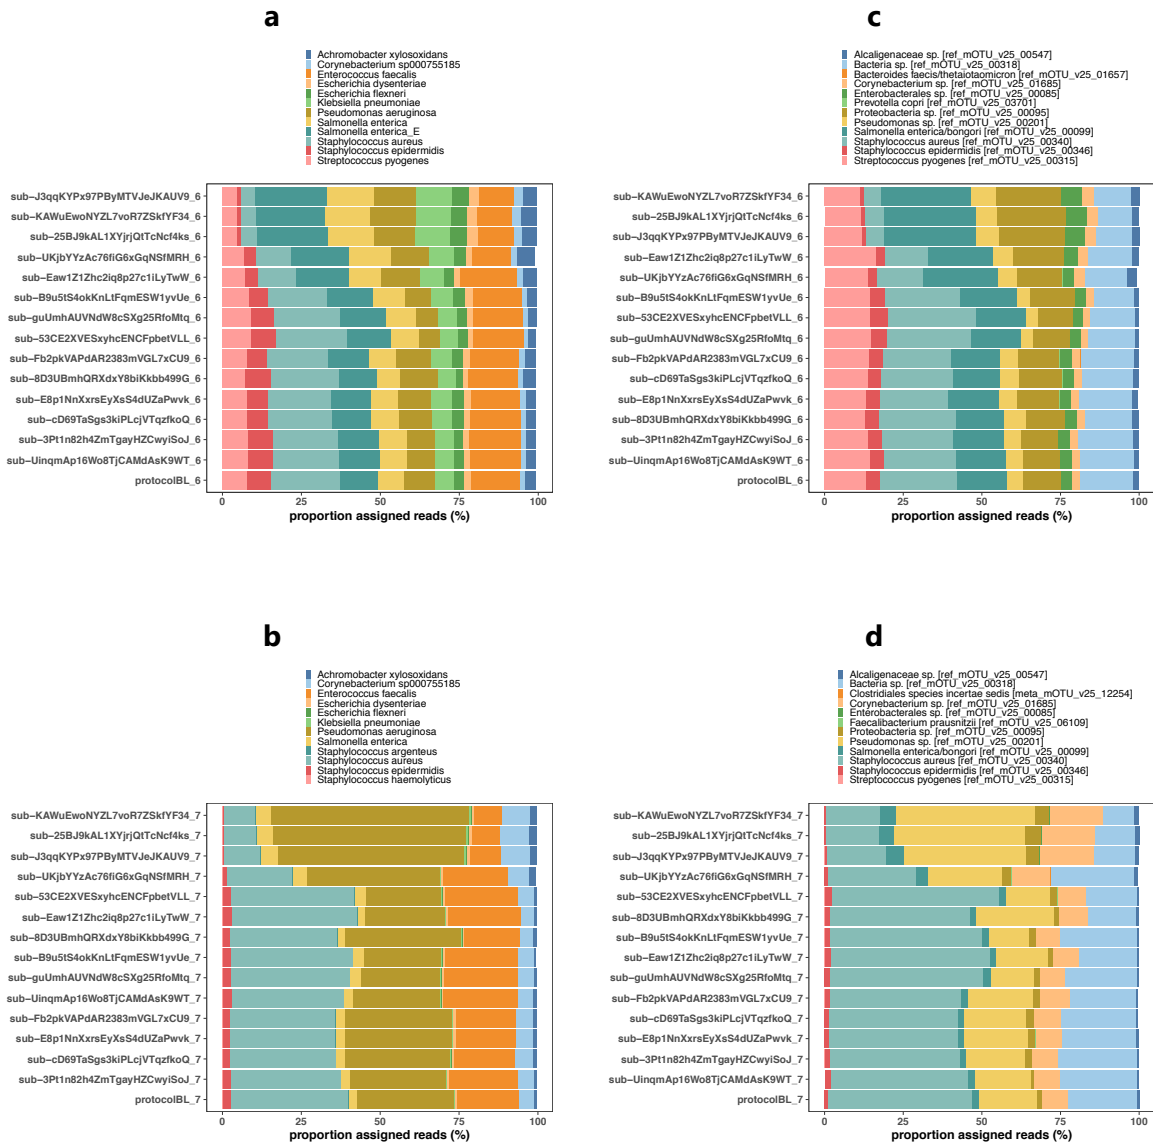

**Supplementary Figure S20.** Results of the MOSAIC Standards Challenge samples for the DNA mock communities (sample 6, NIST Mix A, in panel a and c; sample 7, NIST Mix B, in panel b and d). Panels a and c and panels b and d show results based on taxonomic profiling using kraken2 (species-level) and mOTUs2 (mOTU-level), respectively. Data generated using our recommended protocol BL are shown at the bottom of each chart. Samples are ordered along the y-axis based on their Bray-Curtis dissimilarity to protocol BL, independently in panels a and b. Note that only the top-12 most abundant species/mOTUs (based on feature-wise maximum abundance across all samples) are plotted.

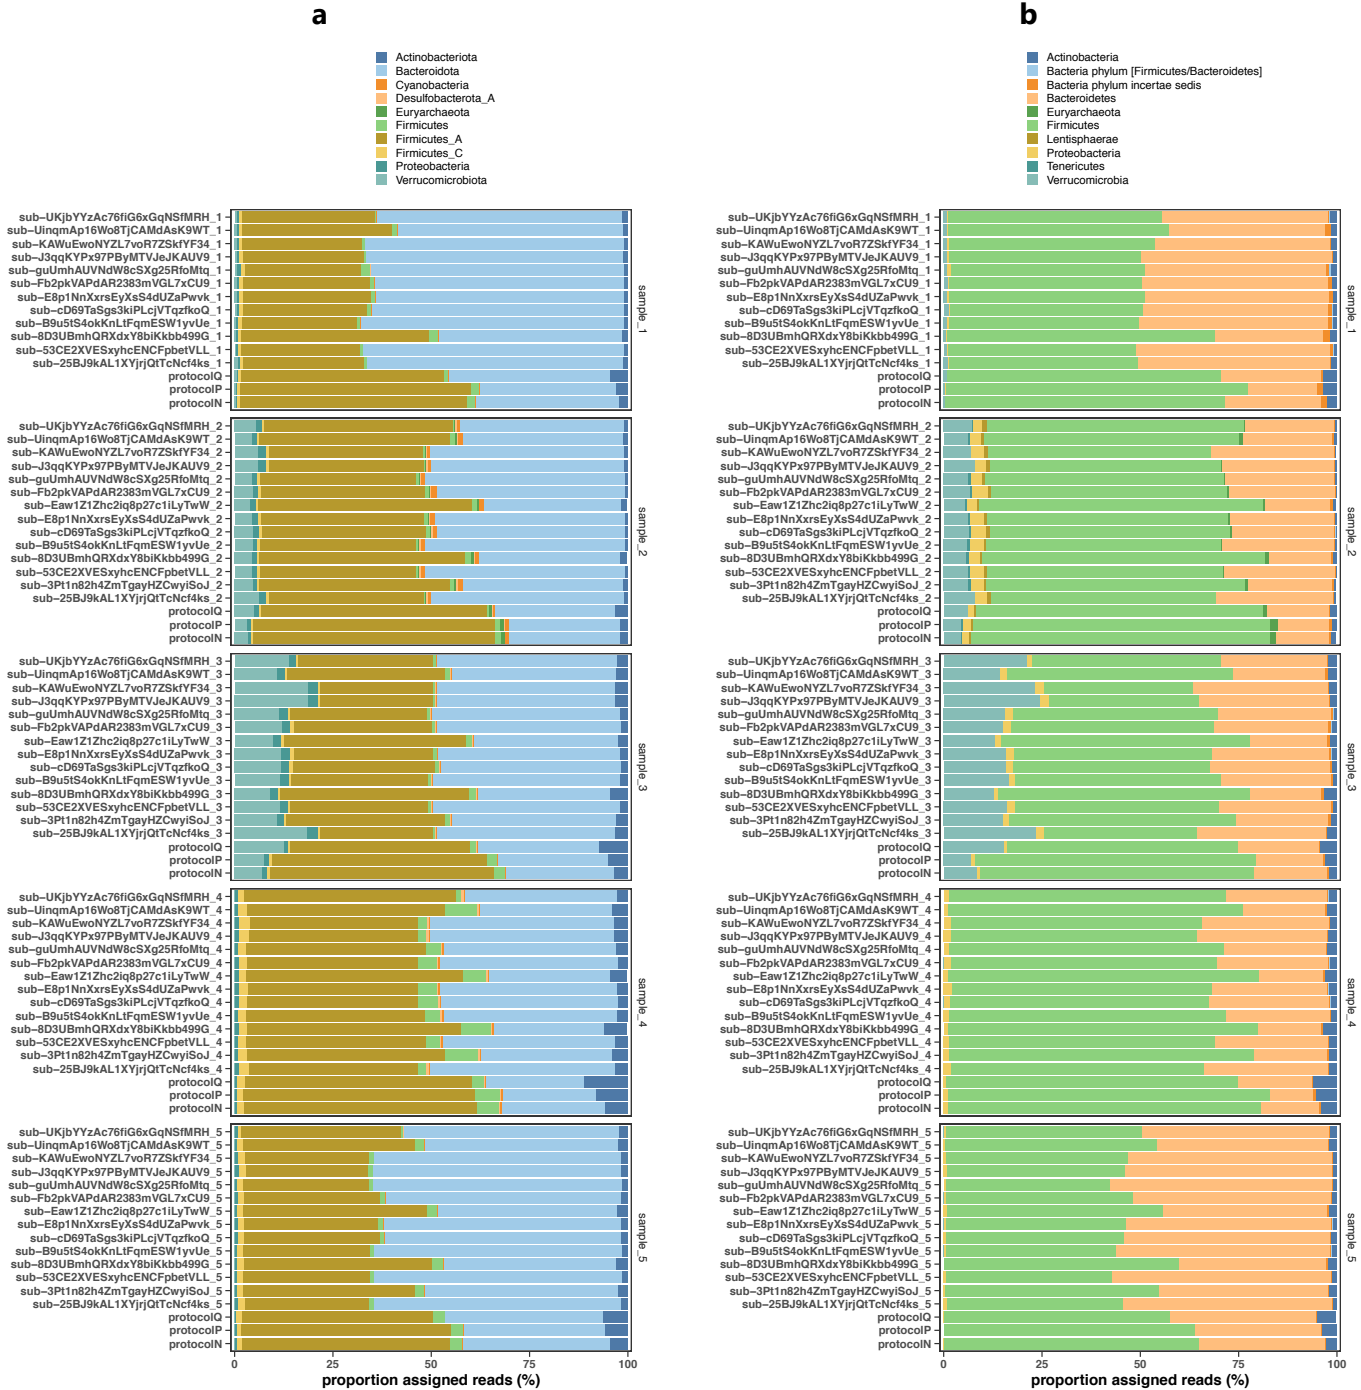

**Supplementary Figure S21.** Results of the MOSAIC Standards Challenge samples for fecal samples 1 – 5. Bar charts show the proportion of assigned reads at the phylum level using kraken2 (a) or MOTUs2 (b). Data for protocols P, N and Q were generated in this study.

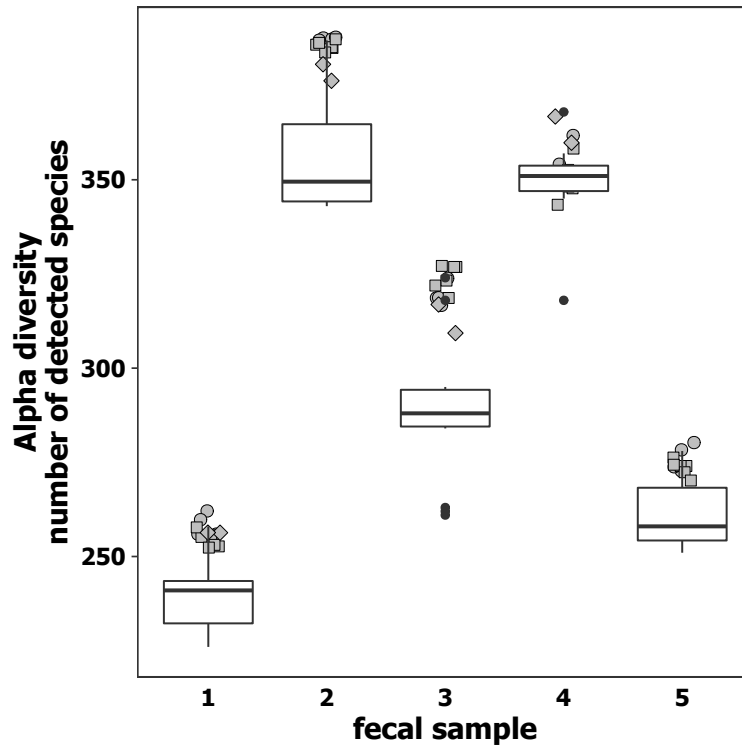

**Supplementary Figure S22.** Alpha diversity of the MOSAIC Standards Challenge samples for fecal samples 1 – 5: comparison of species richness (number of species with non-zero assigned reads) among protocols. Boxplots represent the distribution of species richness observed for public data sets and colored symbols show data for protocols P (circles), N (squares) and Q (diamonds) as generated in this work. Boxplots were generated using ggplot2's geom\_box function.

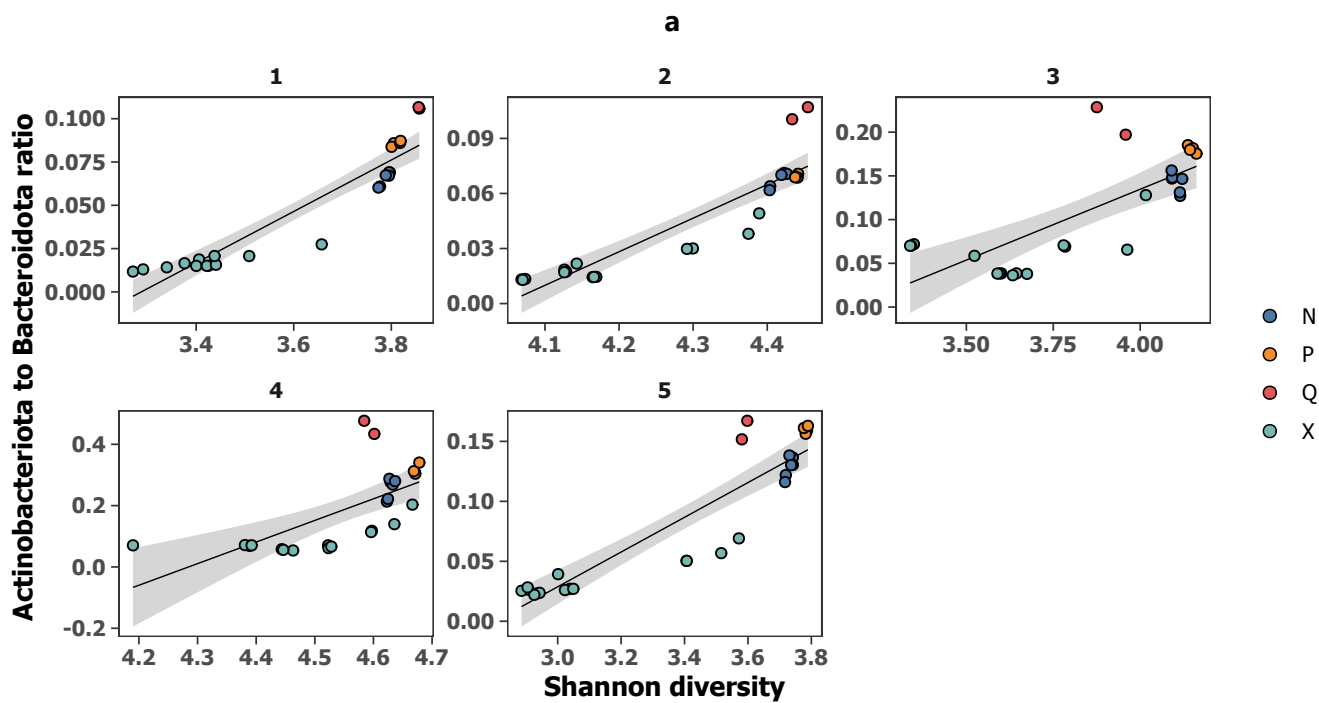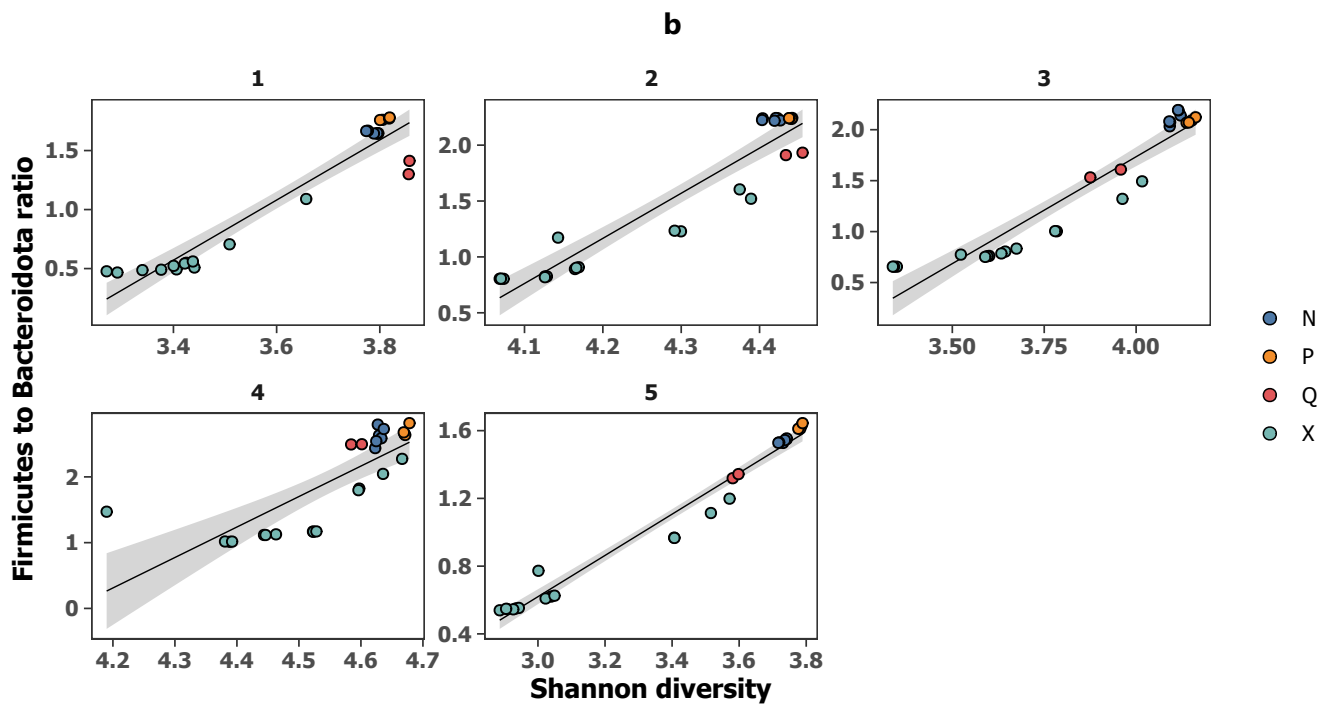

**Supplementary Figure S23.** Relationship between relative recovery of typical Gram-positives and Gram-negatives and Shannon diversity, based on data from the MOSAIC Standards Challenge. Shannon diversity was estimated based on species-level taxonomic profiles generated using kraken2. Protocol X represents publicly available data. The linear regression line and confidence intervals were generated using ggplot2's geom\_smooth function. Subpanels labeled 1 through 5 represent the different fecal samples included in the MOSAIC Standards Challenge.

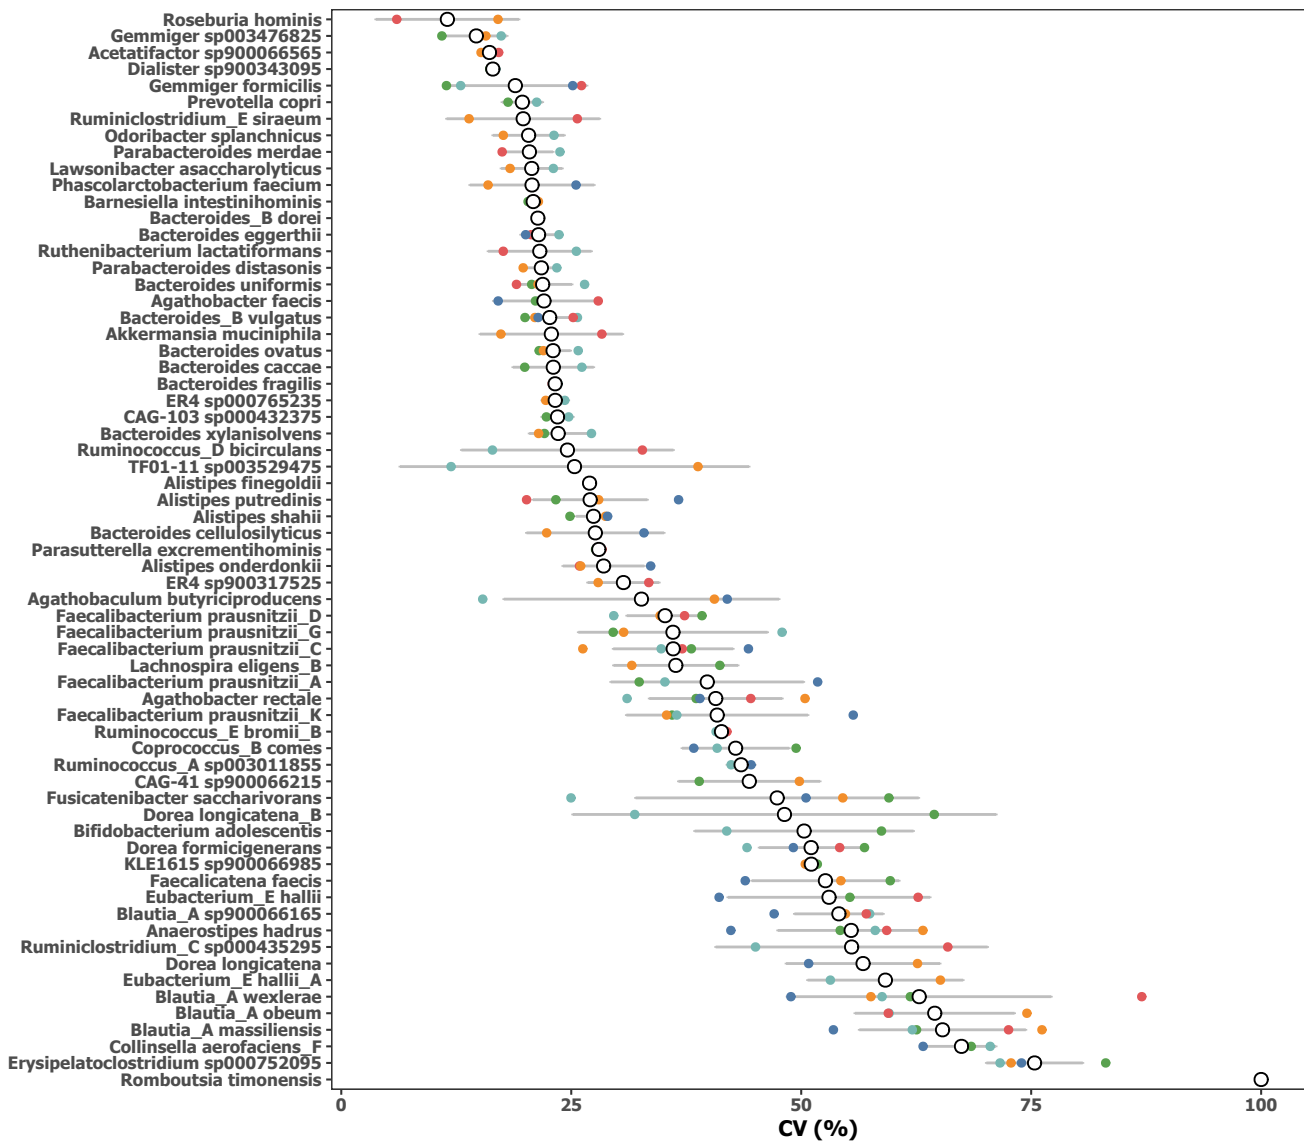

**Supplementary Figure S24.** Species-wise coefficient of variation (CV) for the MOSAIC Standards Challenge data. Colored symbols represent data for individual fecal samples ( $n=5$ ), white circles and lines represent the mean and standard deviation across fecal samples. Symbol colors represent the five different fecal samples included in the MOSAIC Standards Challenge. Only species with a mean abundance of  $>0.5\%$  in at least two samples were considered in the analysis. Species abundances were estimated using kraken2.

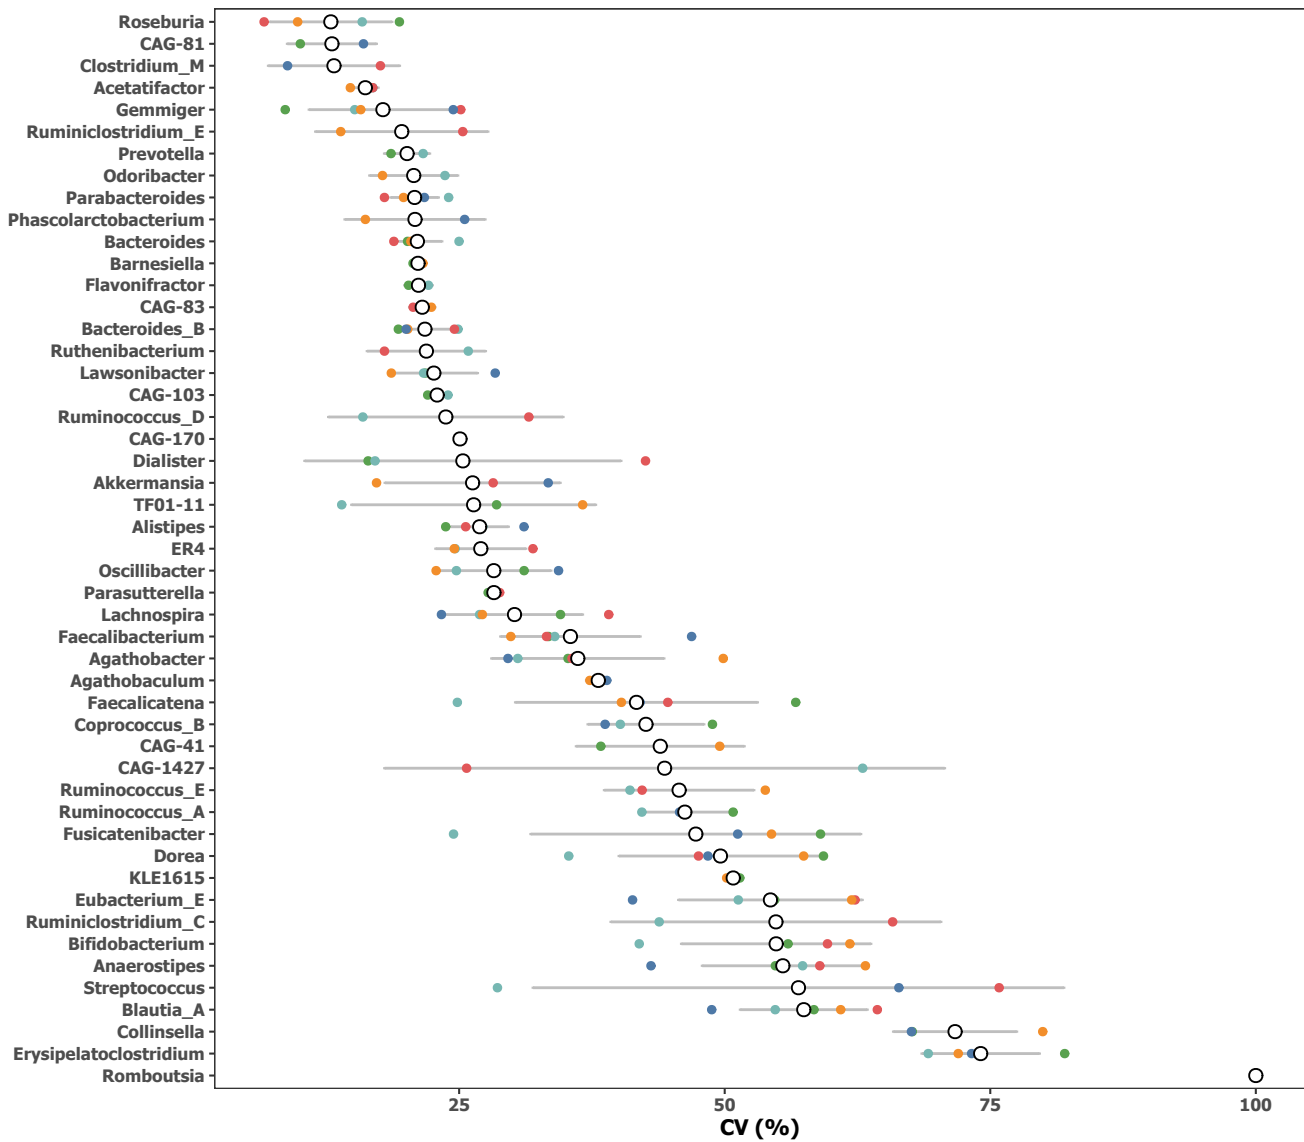

**Supplementary Figure S24, cont'd.** Genus-wise coefficient of variation (CV) for the MOSAIC Standards Challenge data.

## Scenario A: Implementation SOPs

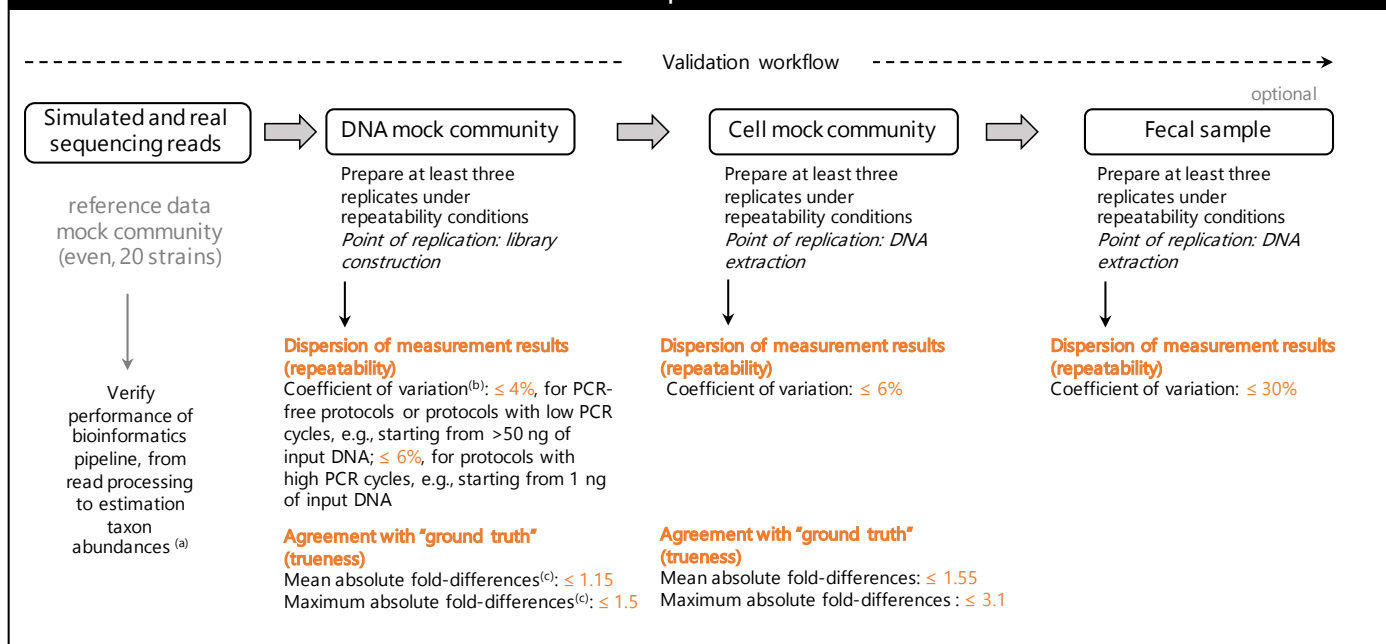

(a) Complete reference genome sequences should be used and estimated genome relative abundances be on par with estimates generated by kallisto

(b) Computed as the quadratic mean of strain-wise coefficients of variation (that is, qmCV)

(c) Computed as geometric mean or maximum of strain-wise absolute fold differences (that is, gmAFD and maximum AFD) to the known composition ("ground truth") of the mock communities

### Scenario B: Routine quality control

- DNA mock community in each sequencing run to evaluate potential sequencing bias, in addition to performance of library construction
- Cell mock community and fecal samples should preferably be included in sequencing run, but periodic assessment may be acceptable

Perform quality control for each sequencing run and continually assess intermediate precision based on data from control samples in past sequencing runs

#### Agreement with "ground truth" (trueness)

Same as in Scenario A

#### Dispersion of measurement results (intermediate precision)

Coefficient of variation, DNA mock:  $\leq 6\%$   
Coefficient of variation, cell mock:  $\leq 6\%$   
Coefficient of variation, feces:  $\leq 30\%$

### Scenario C: Interlaboratory study

- Ensure level of proficiency for each laboratory following guidelines for *scenario A*
- Distribute reference samples (cell mock community and fecal samples) across participants
- Each participating laboratory performs at least 2 replicated measurements

Verify agreement of measurement results across laboratories (reproducibility)

#### Dispersion of measurement results (interlaboratory reproducibility)

Coefficient of variation, cell mock:  $\leq 6\%$ , all sequencing performed by a single laboratory;  $\leq 33\%$ , sequencing distributed across multiple laboratories  
Coefficient of variation, feces:  $\leq 51\%$ , depended on the homogeneity of the sample

**Supplementary Figure S25.** Illustration of guidelines and best practices in three case scenarios. Note that proposed values may not fully apply to other mock communities and/or fecal samples with different composition due to sample-specific effects, different homogeneity, different degrees of "uncertainty" in reference value assignments ("ground truth"), etc.

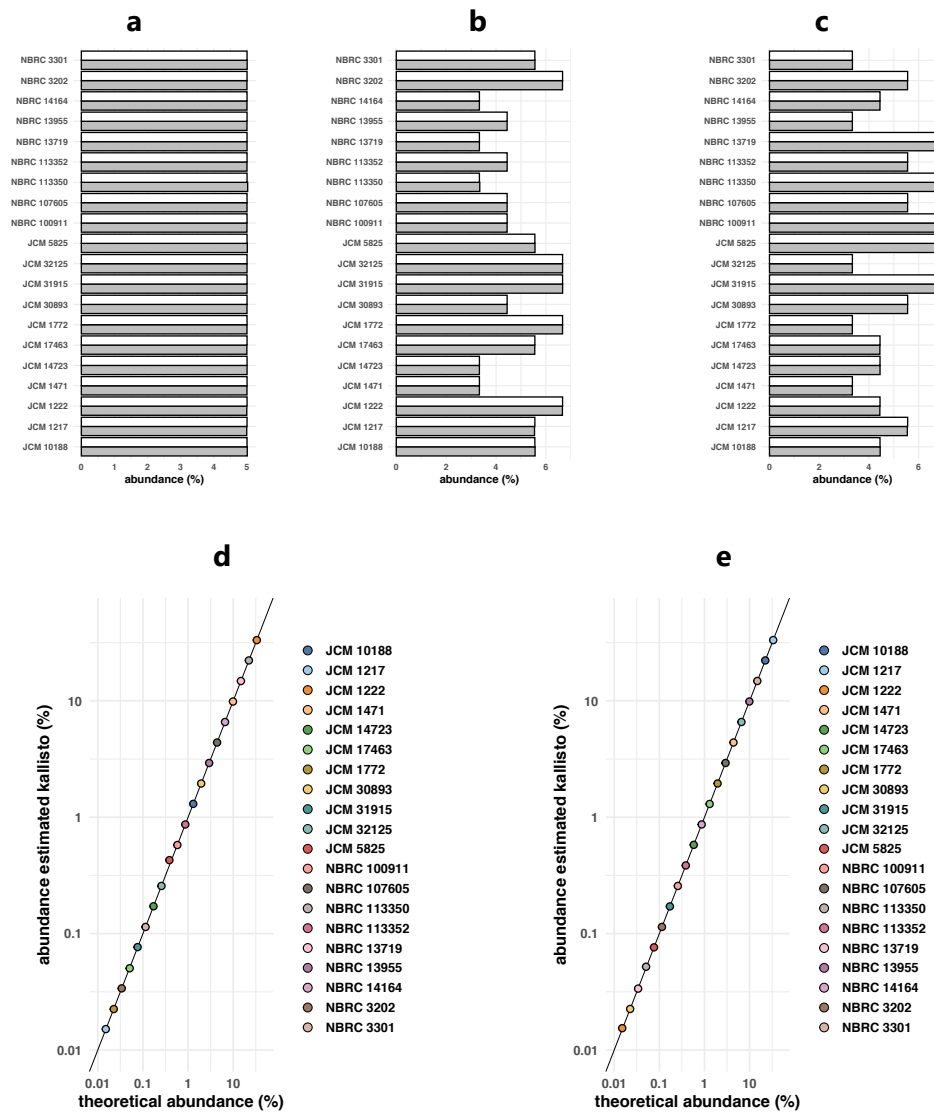

**Supplementary Figure S26.** Performance of kallisto for alignment-free quantification of genome relative abundances (GRAs), as evaluated using simulated sequencing data. For the upper three plots (a – c), the theoretical and estimated abundances are shown in grey and white, respectively. Panel a shows the results for an even composition and panels b and c show results for moderately staggered compositions, with ranges in strain-wise abundances comparable to the observed ranges for the DNA mock community measured with different protocols for sequencing library construction. The bottom panels (d – e) show the results for highly staggered compositions to highlight the accuracy of quantification of the two subspecies of *Bifidobacterium longum*, namely *B. longum* subsp. *infantis* strain JCM 1222 and *B. longum* subsp. *longum* strain JCM 1217. Simulated sequencing reads (1 million read pairs per simulated read data set for a given mock community) were generated using BMAP's randomreads.sh command, with options paired=t gaussian=t minlength=151 maxlength=151 mininsert=0 maxinsert=400 maxq=36 midq=28 minq=20 adderrors=t. For read pairs with short insert sizes, adapter sequences were added by specifying the options fragadapter=AGATCGGAAGAGCACACGTCTGAACTCCAGTCACTTATAACCATCTCGTATGCCGTCTTCTGCTTGAAAAGGGG and fragadapter2=AGATCGGAAGAGCGTCGTGTAGGGAAAGAGTGTTCGATATCGTGGGG. Note that simulated read data were quality trimmed using fastp to ensure consistency with real sequencing data.



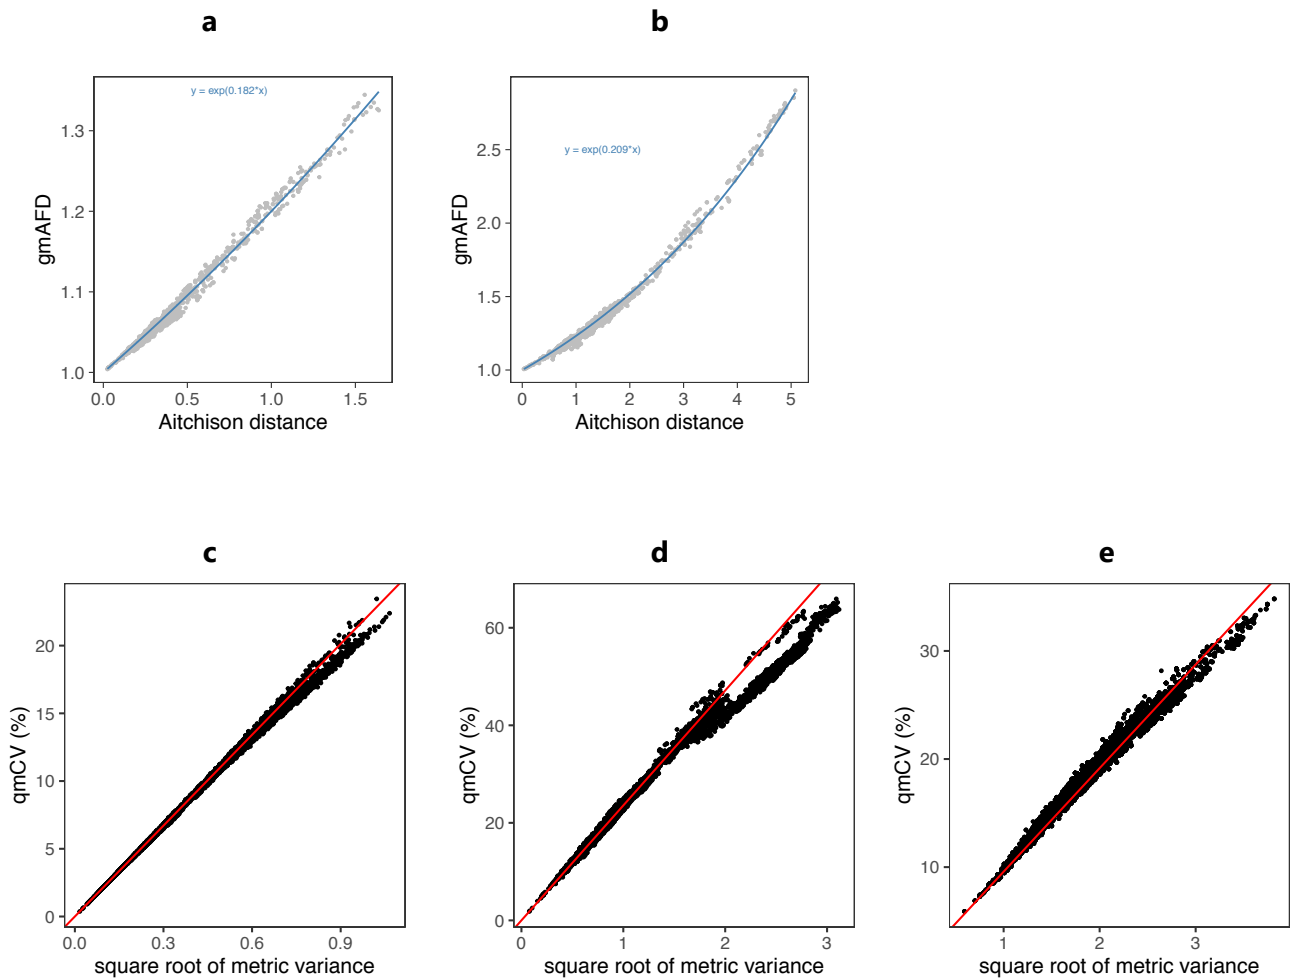

**Supplementary Figure S27.** (a,b) Relationship between the Aitchison distance and geometric mean of strain-wise absolute fold differences (gmAFD) for (a) the DNA mock community and (b) the cell mock community. Data points were generated based on 1,000 random pairs of measurements, using data from phase I (comparison of methods) of this study. The blue line represents the fitted exponential model, generating using the function `nls` in R's stats package. (c-e) Relationship between the square root of the metric variance (x-axis) and quadratic mean of strain-wise coefficients of variation (qmCV) for (a) the DNA mock community, (b) the cell mock community and (c) fecal sample S01. The red line represents the proportionality constant of  $D^{-1/2}$ , where  $D$  represents the number of strains/species considered in the analysis. Data points were generated based on 10,000 random subsets of three measurements each, using data from phase I (comparison of methods) for the DNA and cell mock communities and data from phase II (evaluation of intermediate precision and interlaboratory reproducibility) for the fecal sample.

## Supplementary Tables

**Supplementary Table S1.** Overview of the DNA and cell mock communities developed in this study.

| species                                                    | strain                   | GenBank/Nucleotide accession number                      | GenBank assembly accession | genome size (bp) | genome GC content (%) | cell wall type (Gram type) | abundance in DNA mock community (%) | abundance in cell mock community (%) | reference genome assembly        | Cultivation medium, atmosphere, temperature, time                                    |
|------------------------------------------------------------|--------------------------|----------------------------------------------------------|----------------------------|------------------|-----------------------|----------------------------|-------------------------------------|--------------------------------------|----------------------------------|--------------------------------------------------------------------------------------|
| <i>Collinsella aerofaciens</i>                             | JCM 10188 <sup>T</sup>   | CP048433<br>CP048434<br>CP048435                         | GCA_010509075.1            | 2,455,328        | 60.6                  | positive                   | 5.0                                 | 5.3                                  | Tourlousse <i>et al.</i> (2020a) | modified GAM broth + 1% glucose, anaerobic (N <sub>2</sub> atmosphere), 37 °C, 24 h  |
| <i>Blautia producta</i>                                    | JCM 1471 <sup>T</sup>    | CP048626                                                 | GCA_010669205.1            | 6,197,116        | 45.7                  | positive                   | 5.0                                 | 4.2                                  | Tourlousse <i>et al.</i> (2020b) | modified GAM broth + 1% glucose, anaerobic (N <sub>2</sub> atmosphere), 37 °C, 24 h  |
| <i>Megamonas funiformis</i>                                | JCM 14723 <sup>T</sup>   | CP048627<br>CP048628                                     | GCA_010669225.1            | 2,568,766        | 31.5                  | -                          | 5.0                                 | 0.0 <sup>a</sup>                     | Tourlousse <i>et al.</i> (2020c) | modified GAM broth, anaerobic (N <sub>2</sub> atmosphere), 37 °C, 24 h               |
| <i>Flavanifractor plautii</i>                              | JCM 32125 <sup>T</sup>   | CP048436                                                 | GCA_010508875.1            | 3,985,392        | 60.9                  | positive                   | 5.0                                 | 2.8                                  | Tourlousse <i>et al.</i> (2020d) | modified GAM broth + 1% glucose, anaerobic (N <sub>2</sub> atmosphere), 37 °C, 24 h  |
| <i>Escherichia coli</i>                                    | NBRC 3301                | CP048439<br>CP048440                                     | GCA_010509415.1            | 4,755,096        | 50.8                  | negative                   | 5.0                                 | 1.7                                  | This study <sup>b</sup>          | medium 702 <sup>c</sup> , aerobic (180 rpm), 30 °C, 24 h                             |
| <i>Akkermansia muciniphila</i>                             | JCM 30893                | CP048438                                                 | GCA_010509235.1            | 2,878,261        | 55.6                  | negative                   | 5.0                                 | 2.7                                  | This study <sup>b</sup>          | modified GAM broth + 33 mM NaOAc, anaerobic (N <sub>2</sub> atmosphere), 37 °C, 24 h |
| <i>Faecalibacterium prausnitzii</i>                        | JCM 31915                | CP048437                                                 | GCA_010509575.1            | 3,102,523        | 56.4                  | positive                   | 5.0                                 | 6.2                                  | This study <sup>b</sup>          | modified GAM broth + 33 mM NaOAc, anaerobic (N <sub>2</sub> atmosphere), 37 °C, 24 h |
| <i>Staphylococcus epidermidis</i>                          | NBRC 100911 <sup>T</sup> | AP019721<br>AP019722                                     | GCA_006742205.1            | 2,427,041        | 32.3                  | positive                   | 5.0                                 | 5.3                                  | This study <sup>b</sup>          | medium 702 <sup>c</sup> , aerobic (180 rpm), 30 °C, 24 h                             |
| <i>Cutibacterium acnes</i> subsp. <i>acnes</i>             | NBRC 107605 <sup>T</sup> | AP019723                                                 | GCA_006739385.1            | 2,494,738        | 60.0                  | positive                   | 5.0                                 | 7.9                                  | This study <sup>b</sup>          | modified GAM broth + 1% glucose, anaerobic (N <sub>2</sub> atmosphere), 37 °C, 48 h  |
| <i>Bacteroides uniformis</i>                               | NBRC 113350              | AP019724<br>AP019725<br>AP019726<br>AP019727<br>AP019728 | GCA_006742345.1            | 4,989,532        | 46.2                  | negative                   | 5.0                                 | 2.8                                  | This study <sup>b</sup>          | modified GAM broth + 1% glucose, anaerobic (N <sub>2</sub> atmosphere), 37 °C, 24 h  |
| <i>Enterocloster clostridioforme</i>                       | NBRC 113352              | BJLB01000001<br>BJLB01000002                             | GCA_006538465.1            | 5,687,315        | 48.9                  | positive                   | 5.0                                 | 3.1                                  | This study <sup>b</sup>          | modified GAM broth + 1% glucose, anaerobic (N <sub>2</sub> atmosphere), 37 °C, 24 h  |
| <i>Bacillus subtilis</i> subsp. <i>subtilis</i>            | NBRC 13719 <sup>T</sup>  | AP019714<br>AP019715                                     | GCA_006741845.1            | 4,295,305        | 43.3                  | positive                   | 5.0                                 | 3.0                                  | This study <sup>b</sup>          | medium 702, aerobic (180 rpm), 30 °C, 24 h                                           |
| <i>Streptococcus mutans</i>                                | NBRC 13955 <sup>T</sup>  | AP019720                                                 | GCA_006739205.1            | 2,018,796        | 36.9                  | positive                   | 5.0                                 | 6.2                                  | This study <sup>b</sup>          | medium 310 <sup>c</sup> , anaerobic (N <sub>2</sub> atmosphere), 37 °C, 24 h         |
| <i>Lactobacillus delbrueckii</i> subsp. <i>delbrueckii</i> | NBRC 3202 <sup>T</sup>   | AP019750                                                 | GCA_006740305.1            | 1,910,306        | 50.1                  | positive                   | 5.0                                 | 11.9                                 | This study <sup>b</sup>          | medium 804 <sup>c</sup> , anaerobic (N <sub>2</sub> atmosphere), 30 °C, 24 h         |
| <i>Pseudomonas putida</i>                                  | NBRC 14164 <sup>T</sup>  | AP013070                                                 | GCA_000412675.1            | 6,156,701        | 62.3                  | negative                   | 5.0                                 | 3.5                                  |                                  | medium 702 <sup>c</sup> , aerobic (180 rpm), 30 °C, 24 h                             |
| <i>Bifidobacterium longum</i> subsp. <i>longum</i>         | JCM 1217 <sup>T</sup>    | AP010888                                                 | GCA_000196555.1            | 2,385,164        | 60.3                  | positive                   | 5.0                                 | 19.1                                 |                                  | modified GAM broth + 1% glucose, anaerobic (N <sub>2</sub> atmosphere), 37 °C, 24 h  |
| <i>Agathobacter rectalis</i>                               | JCM 17463 <sup>T</sup>   | CP001107                                                 | GCA_000020605.1            | 3,449,685        | 41.5                  | positive                   | 5.0                                 | 2.7                                  |                                  | modified GAM broth + 33 mM NaOAc, anaerobic (N <sub>2</sub> atmosphere), 37 °C, 24 h |
| <i>Megasphaera elsdenii</i>                                | JCM 1772 <sup>T</sup>    | CP027570                                                 | GCA_003010495.1            | 2,478,942        | 52.8                  | -                          | 5.0                                 | 0.0 <sup>a</sup>                     |                                  | modified GAM broth, anaerobic (N <sub>2</sub> atmosphere), 37 °C, 24 h               |
| <i>Parabacteroides distasonis</i>                          | JCM 5825 <sup>T</sup>    | CP000140                                                 | GCA_000012845.1            | 4,811,379        | 45.1                  | negative                   | 5.0                                 | 2.1                                  |                                  | modified GAM broth + 1% glucose, anaerobic (N <sub>2</sub> atmosphere), 37 °C, 24 h  |
| <i>Bifidobacterium longum</i> subsp. <i>infantis</i>       | JCM 1222 <sup>T</sup>    | AP010889                                                 | GCA_000269965.1            | 2,828,958        | 59.9                  | positive                   | 5.0                                 | 9.6                                  |                                  | modified GAM broth + 1% glucose, anaerobic (N <sub>2</sub> atmosphere), 37 °C, 24 h  |

<sup>(a)</sup> Not included in the cell mock community.

<sup>(b)</sup> See Supplementary Methods for details.

<sup>(c)</sup> medium 310: <https://www.nite.go.jp/nbrc/catalogue/NBRCMediumDetailServlet?NO=310>  
 medium 702: <https://www.nite.go.jp/nbrc/catalogue/NBRCMediumDetailServlet?NO=702>  
 medium 804: <https://www.nite.go.jp/nbrc/catalogue/NBRCMediumDetailServlet?NO=804>

**Supplementary Table S2.** Description of kits / protocols for sequencing library construction.

| kit name                                      | company             | method of DNA fragmentation | number of reaction steps / purifications | Required time (h)      | 500 ng input DNA (PCR-free) | 50 ng input DNA (PCR cycles) (fragmentation time, enzymatic) | 1 ng input DNA (PCR cycles) (fragmentation time, enzymatic) | one-letter abbreviation |
|-----------------------------------------------|---------------------|-----------------------------|------------------------------------------|------------------------|-----------------------------|--------------------------------------------------------------|-------------------------------------------------------------|-------------------------|
| Accel NGS 2S Plus DNA Library Kit             | Swift Biosciences   | physical                    | 5 / 5 (PCR -)<br>6 / 6 (PCR +)           | 6 (PCR -)<br>7 (PCR)   | •                           | •<br>(4 cycles)                                              | •<br>(9 cycles)                                             | A                       |
| QIaseq FX DNA Library Kit                     | Qiagen              | enzymatic                   | 2 / 3 (PCR -)<br>3 / 4 (PCR +)           | 4 (PCR -)<br>6 (PCR +) | •<br>(9 min)                | •<br>(8 cycles)<br>(12 min)                                  | •<br>(12)<br>(8 min) <sup>a</sup>                           | B                       |
| TruSeq (Nano) DNA (PCR-Free) Library Prep Kit | Illumina            | physical                    | 4 / 4 (PCR -)<br>5 / 5 (PCR -)           | 7 (PCR -)<br>8 (PCR +) | •                           | •<br>(8 cycles)                                              | •<br>(8 cycles)                                             | C                       |
| KAPA HTP Library Preparation Kit              | Roche               | physical                    | 4 / 5 (PCR -)<br>5 / 6 (PCR)             | 8 (PCR -)<br>9 (PCR)   | •                           | •<br>(5 cycles)                                              | •<br>(15 cycles)                                            | D                       |
| KAPA HyperPrep (PCR-free) Kit                 | Roche               | physical                    | 3 / 2                                    | 4.5                    | •                           | •<br>(4 cycles)                                              | •<br>(14 cycles)                                            | E                       |
| KAPA HyperPrep + KAPA Frag                    | Roche               | enzymatic                   | 4 / 3                                    | 5.5                    | •<br>(10 min)               | •<br>(4 cycles)<br>(10 min)                                  | •<br>(14 cycles)<br>(10 min)                                | F                       |
| KAPA HTP + KAPA Frag                          | Roche               | enzymatic                   | 5 / 6 (PCR +)                            | 9 (PCR +)              |                             | •<br>(5 cycles)<br>(10 min)                                  | •<br>(15 cycles)<br>(10 min)                                | G                       |
| NEBNext Ultra II DNA Library Prep Kit         | New England Biolabs | physical                    | 5 / 4                                    | 6                      |                             | •<br>(4 cycles)                                              | •<br>(9 cycles)                                             | H                       |
| NEBNext Ultra II FS DNA Library Prep Kit      | New England Biolabs | enzymatic                   | 4 / 3                                    | 6                      |                             | •<br>(4 cycles)<br>(15 min)                                  | •<br>(9 cycles)<br>(15 min)                                 | I                       |
| Nextera DNA Flex Library Prep Kit             | Illumina            | enzymatic                   | 2 / 2                                    | 4.5                    |                             | •<br>(5 cycles)<br>(15 min)                                  | •<br>(12 cycles)<br>(15 min)                                | J                       |
| SMARTer ThruPLEX DNA-Seq Kit                  | Takara Bio          | physical                    | 4 / 3                                    | 5                      |                             | •<br>(6 cycles)                                              | •<br>(11 cycles)                                            | K                       |

<sup>a</sup> With FX Enhancer.

**Supplementary Table S3.** Target values for achievable performance of measurement results, in terms of acceptable level of errors (that is, differences between measured values and the “ground truth” for mock communities).

| sample type         | geometric mean                        | maximum                               |
|---------------------|---------------------------------------|---------------------------------------|
|                     | strain-wise absolute fold differences | strain-wise absolute fold differences |
| DNA mock community  | 1.15                                  | 1.5                                   |
| Cell mock community | 1.55                                  | 3.1                                   |

**Supplementary Table S4.** Description of kits / protocols for DNA extraction.

| kit name                                        | company                           | approximate time required (h) <sup>a</sup> | bead beating time                                        | bead beating instrument | bead beating format | one-letter abbreviation |
|-------------------------------------------------|-----------------------------------|--------------------------------------------|----------------------------------------------------------|-------------------------|---------------------|-------------------------|
| Extrap Soil DNA Kit Plus ver.2                  | NIPPON STEEL Eco-Tech Corporation | 2                                          | 1 × 40 s<br>1 × 60 s<br>2 × 60 s<br>3 × 60 s<br>4 × 60 s | FastPrep-24             | tube                | L                       |
| FastDNA SPIN Kit for Feces                      | MP Biomedicals                    | 3                                          | 1 × 40 s                                                 | FastPrep-24             | tube                | M                       |
| ISOSPIN Fecal DNA                               | Nippon Gene                       | 2                                          | 1 × 40 s<br>1 × 60 s<br>2 × 60 s<br>3 × 60 s<br>4 × 60 s | FastPrep-24             | tube                | N                       |
| MagAttract PowerMicrobiome RNA/DNA EP Kit       | Qiagen                            | 4                                          | 2 × 600 s                                                | TissueLyser II          | plate               | O                       |
| in-house phenol/chloroform-based protocol       | -                                 | 3                                          | 1 × 40 s                                                 | FastPrep-24             | tube                | P                       |
| QIAamp DNA Stool Mini Kit based IHMS protocol Q | Qiagen                            | 6                                          | 8 × 60 s                                                 | FastPrep-24             | tube                | Q                       |
| MORA-EXTRACT                                    | Kyokuto Pharmaceutical            | 2                                          | 1 × 40 s                                                 | FastPrep-24             | tube                | R                       |
| QIAamp PowerFecal Pro DNA Kit                   | Qiagen                            | 3                                          | 1 × 40 s<br>1 × 60 s<br>2 × 60 s<br>3 × 60 s<br>4 × 60 s | FastPrep-24             | tube                | S                       |
| Quick DNA Fecal/Soil microbe Miniprep Kit       | Zymo Research                     | 3                                          | 1 × 40 s                                                 | FastPrep-24             | tube                | T                       |

<sup>a</sup> Estimated based on processing of 8 samples.

**Supplementary Table S5.** Overview of materials generated in the interlaboratory study for assessing transferability and reproducibility of our recommended protocols for DNA extraction and sequencing library construction.

| Laboratory <sup>a</sup>       |                                 | A   | B   | C   |        | D   |        | E   |        | F   | G   | H   | I   | J   |
|-------------------------------|---------------------------------|-----|-----|-----|--------|-----|--------|-----|--------|-----|-----|-----|-----|-----|
|                               |                                 | SOP | SOP | SOP | custom | SOP | custom | SOP | custom | SOP | SOP | SOP | SOP | SOP |
| DNA mock community            | sequencing library <sup>c</sup> | ●   | ●   |     |        |     |        |     |        |     | ●   | ●   |     |     |
|                               | sequencing data                 | ●   | ●   |     |        |     |        |     |        |     | ●   | ●   |     |     |
| cell mock community           | extracted DNA <sup>d</sup>      | ●   | ●   | ●   | ●      | ●   | ●      | ●   | ●      | ●   | ●   | ●   | ●   | ●   |
| fecal sample S01              | extracted DNA <sup>d</sup>      | ●   | ●   | ●   | ●      | ●   | ●      | ●   | ●      | ●   | ●   | ●   | ●   | ●   |
|                               | sequencing data                 | ●   | ●   |     |        |     |        |     |        |     | ●   | ●   |     |     |
| fecal samples S02,S03,S06,S13 | sequencing data                 | ●   | ●   |     |        |     |        |     |        |     | ●   | ●   |     |     |

<sup>(a)</sup> All laboratories performed duplicate analysis for each of the samples.

<sup>(a)</sup> 'SOP' indicates standard operating procedures as developed in the first phase of this study, namely protocols N and BL for DNA extraction and library construction, respectively. 'Custom' indicates in-house protocols for DNA extraction used by three industry-based laboratories.

<sup>(c)</sup> Sequencing libraries from each participant were shipped to the central laboratory (denoted as laboratory A) for sequencing (NextSeq 500 instrument).

<sup>(d)</sup> Extracted DNAs from each participant were shipped to the central laboratory (denoted as laboratory A) for sequencing library construction (protocol BL) and sequencing (NextSeq 500 instrument).

**Supplementary Table S6.** Proposed target values for precision of measurement results and methods, as repeatability, intermediate precision and interlaboratory reproducibility.

| sample type         | repeatability                                                                                              | intermediate precision | interlaboratory reproducibility                                                                                                           |
|---------------------|------------------------------------------------------------------------------------------------------------|------------------------|-------------------------------------------------------------------------------------------------------------------------------------------|
| DNA mock community  | 4%, for PCR-free protocols or protocols with low PCR cycles, <i>e.g.</i> starting from >50 ng of input DNA | 6%                     | 6%, with centralized sequencing or for PCR-free protocols or protocols with low PCR cycles, <i>e.g.</i> starting from >50 ng of input DNA |
|                     | 6%, for protocols with high PCR cycles, <i>e.g.</i> starting from 1 ng of input DNA                        |                        | 17%, with de-centralized sequencing and for PCR-free methods or low PCR cycles, <i>e.g.</i> starting from >50 ng of input DNA             |
| Cell mock community | 6%                                                                                                         | 6%                     | 6%, with centralized sequencing<br>33%, with de-centralized sequencing                                                                    |
| Feces               | 30%                                                                                                        | 30%                    | 51%                                                                                                                                       |

Note: Values represent rounded one-sided 95% confidence intervals of precision estimates generated in this study.

**Supplementary Table S7.** List of external MOSAIC Standards Challenge datasets analyzed in this study.

| fastq ID                       | read pairs | mean read length (R1 R2) | comment | fastq ID                        | read pairs | mean read length (R1 R2) | comment                    |
|--------------------------------|------------|--------------------------|---------|---------------------------------|------------|--------------------------|----------------------------|
| sub-25BJ9kAL1XYjrjQtTcNcf4ks_1 | 18,647,995 | 149 149                  | -       | sub-3Pt1n82h4ZmTgayHZCwysiSoJ_1 | 1,801      | 150 150                  | not analyzed               |
| sub-25BJ9kAL1XYjrjQtTcNcf4ks_2 | 19,362,584 | 149 149                  | -       | sub-3Pt1n82h4ZmTgayHZCwysiSoJ_2 | 17,845,710 | 150 150                  | -                          |
| sub-25BJ9kAL1XYjrjQtTcNcf4ks_3 | 20,790,237 | 149 149                  | -       | sub-3Pt1n82h4ZmTgayHZCwysiSoJ_3 | 11,516,946 | 150 150                  | -                          |
| sub-25BJ9kAL1XYjrjQtTcNcf4ks_4 | 23,376,218 | 149 149                  | -       | sub-3Pt1n82h4ZmTgayHZCwysiSoJ_4 | 16,641,498 | 150 150                  | -                          |
| sub-25BJ9kAL1XYjrjQtTcNcf4ks_5 | 19,044,655 | 149 149                  | -       | sub-3Pt1n82h4ZmTgayHZCwysiSoJ_5 | 10,191,233 | 150 150                  | -                          |
| sub-25BJ9kAL1XYjrjQtTcNcf4ks_6 | 17,407,175 | 149 149                  | -       | sub-3Pt1n82h4ZmTgayHZCwysiSoJ_6 | 17,533,221 | 150 150                  | -                          |
| sub-25BJ9kAL1XYjrjQtTcNcf4ks_7 | 27,197,690 | 149 149                  | -       | sub-3Pt1n82h4ZmTgayHZCwysiSoJ_7 | 21,738,321 | 150 150                  | -                          |
| sub-53CE2XVESyhcENCFpbetVLL_1  | 23,217,124 | 151 151                  | -       | sub-8D3UBmhQRdxY8biKkbb499G_1   | 16,509,360 | 75 75                    | fastp --length_required 50 |
| sub-53CE2XVESyhcENCFpbetVLL_2  | 22,289,812 | 151 151                  | -       | sub-8D3UBmhQRdxY8biKkbb499G_2   | 27,411,246 | 75 75                    | fastp --length_required 50 |
| sub-53CE2XVESyhcENCFpbetVLL_3  | 16,872,339 | 151 151                  | -       | sub-8D3UBmhQRdxY8biKkbb499G_3   | 32,377,707 | 75 75                    | fastp --length_required 50 |
| sub-53CE2XVESyhcENCFpbetVLL_4  | 16,486,851 | 151 151                  | -       | sub-8D3UBmhQRdxY8biKkbb499G_4   | 28,170,870 | 75 75                    | fastp --length_required 50 |
| sub-53CE2XVESyhcENCFpbetVLL_5  | 20,919,218 | 151 151                  | -       | sub-8D3UBmhQRdxY8biKkbb499G_5   | 22,322,868 | 75 75                    | fastp --length_required 50 |
| sub-53CE2XVESyhcENCFpbetVLL_6  | 14,035,358 | 151 151                  | -       | sub-8D3UBmhQRdxY8biKkbb499G_6   | 23,681,207 | 75 75                    | fastp --length_required 50 |
| sub-53CE2XVESyhcENCFpbetVLL_7  | 13,778,703 | 151 151                  | -       | sub-8D3UBmhQRdxY8biKkbb499G_7   | 25,922,046 | 75 75                    | fastp --length_required 50 |
| sub-B9u5tS4okKnlTfQmESW1yvUe_1 | 14,649,192 | 151 151                  | -       | sub-Eaw1Z1Zhc2iq8p27c1iLyTwW_2  | 23,646,590 | 74 74                    | _1 dataset not available   |
| sub-B9u5tS4okKnlTfQmESW1yvUe_2 | 18,378,022 | 151 151                  | -       | sub-Eaw1Z1Zhc2iq8p27c1iLyTwW_3  | 23,321,651 | 74 74                    | fastp --length_required 50 |
| sub-B9u5tS4okKnlTfQmESW1yvUe_3 | 24,968,616 | 151 151                  | -       | sub-Eaw1Z1Zhc2iq8p27c1iLyTwW_4  | 23,153,881 | 74 74                    | fastp --length_required 50 |
| sub-B9u5tS4okKnlTfQmESW1yvUe_4 | 23,067,744 | 151 151                  | -       | sub-Eaw1Z1Zhc2iq8p27c1iLyTwW_5  | 22,838,621 | 74 74                    | fastp --length_required 50 |
| sub-B9u5tS4okKnlTfQmESW1yvUe_5 | 32,681,379 | 151 151                  | -       | sub-Eaw1Z1Zhc2iq8p27c1iLyTwW_6  | 21,385,670 | 74 74                    | fastp --length_required 50 |
| sub-B9u5tS4okKnlTfQmESW1yvUe_6 | 16,533,450 | 151 151                  | -       | sub-Eaw1Z1Zhc2iq8p27c1iLyTwW_7  | 25,854,203 | 74 74                    | fastp --length_required 50 |
| sub-B9u5tS4okKnlTfQmESW1yvUe_7 | 16,885,775 | 151 151                  | -       |                                 |            |                          |                            |
| sub-cD69TaSgs3kiPlcJVTqzfkO_1  | 54,641,438 | 150 150                  | -       | sub-Fb2pkVAPdAR2383mVGL7xCU9_1  | 46,576,557 | 150 150                  | -                          |
| sub-cD69TaSgs3kiPlcJVTqzfkO_2  | 45,221,672 | 150 150                  | -       | sub-Fb2pkVAPdAR2383mVGL7xCU9_2  | 44,060,375 | 150 150                  | -                          |
| sub-cD69TaSgs3kiPlcJVTqzfkO_3  | 48,039,740 | 150 150                  | -       | sub-Fb2pkVAPdAR2383mVGL7xCU9_3  | 50,071,554 | 150 150                  | -                          |
| sub-cD69TaSgs3kiPlcJVTqzfkO_4  | 49,274,107 | 150 150                  | -       | sub-Fb2pkVAPdAR2383mVGL7xCU9_4  | 44,860,282 | 150 150                  | -                          |
| sub-cD69TaSgs3kiPlcJVTqzfkO_5  | 48,438,841 | 150 150                  | -       | sub-Fb2pkVAPdAR2383mVGL7xCU9_5  | 47,455,206 | 150 150                  | -                          |
| sub-cD69TaSgs3kiPlcJVTqzfkO_6  | 43,247,105 | 150 150                  | -       | sub-Fb2pkVAPdAR2383mVGL7xCU9_6  | 52,305,143 | 150 150                  | -                          |
| sub-cD69TaSgs3kiPlcJVTqzfkO_7  | 51,196,340 | 150 150                  | -       | sub-Fb2pkVAPdAR2383mVGL7xCU9_7  | 46,602,971 | 150 150                  | -                          |
| sub-E8p1NnXrsEyXsS4dUZaPwvk_1  | 47,331,443 | 150 150                  | -       | sub-guUmhAUVNdW8cSxg25RfoMtg_1  | 15,202,770 | 151 151                  | -                          |
| sub-E8p1NnXrsEyXsS4dUZaPwvk_2  | 49,304,567 | 150 150                  | -       | sub-guUmhAUVNdW8cSxg25RfoMtg_2  | 21,043,846 | 151 151                  | -                          |
| sub-E8p1NnXrsEyXsS4dUZaPwvk_3  | 46,829,561 | 150 150                  | -       | sub-guUmhAUVNdW8cSxg25RfoMtg_3  | 21,543,820 | 151 151                  | -                          |
| sub-E8p1NnXrsEyXsS4dUZaPwvk_4  | 53,691,345 | 150 150                  | -       | sub-guUmhAUVNdW8cSxg25RfoMtg_4  | 16,737,118 | 151 151                  | -                          |
| sub-E8p1NnXrsEyXsS4dUZaPwvk_5  | 49,012,854 | 150 150                  | -       | sub-guUmhAUVNdW8cSxg25RfoMtg_5  | 31,292,056 | 151 151                  | -                          |
| sub-E8p1NnXrsEyXsS4dUZaPwvk_6  | 52,451,118 | 150 150                  | -       | sub-guUmhAUVNdW8cSxg25RfoMtg_6  | 25,454,069 | 151 151                  | -                          |
| sub-E8p1NnXrsEyXsS4dUZaPwvk_7  | 55,085,550 | 150 150                  | -       | sub-guUmhAUVNdW8cSxg25RfoMtg_7  | 13,366,665 | 151 151                  | -                          |
| sub-J3qqKYPx97PByMTVJeJKAUV9_1 | 20,126,154 | 149 149                  | -       | sub-UinqmAp16Wo8TJCAMdAsk9WT_1  | 15,431,039 | 150 150                  | -                          |
| sub-J3qqKYPx97PByMTVJeJKAUV9_2 | 19,485,360 | 149 149                  | -       | sub-UinqmAp16Wo8TJCAMdAsk9WT_2  | 16,820,032 | 150 150                  | -                          |
| sub-J3qqKYPx97PByMTVJeJKAUV9_3 | 24,173,799 | 149 149                  | -       | sub-UinqmAp16Wo8TJCAMdAsk9WT_3  | 12,329,890 | 150 150                  | -                          |
| sub-J3qqKYPx97PByMTVJeJKAUV9_4 | 27,590,776 | 149 149                  | -       | sub-UinqmAp16Wo8TJCAMdAsk9WT_4  | 12,444,202 | 150 150                  | -                          |
| sub-J3qqKYPx97PByMTVJeJKAUV9_5 | 22,162,572 | 149 149                  | -       | sub-UinqmAp16Wo8TJCAMdAsk9WT_5  | 10,221,193 | 150 150                  | -                          |
| sub-J3qqKYPx97PByMTVJeJKAUV9_6 | 24,946,811 | 149 149                  | -       | sub-UinqmAp16Wo8TJCAMdAsk9WT_6  | 16,323,600 | 150 150                  | -                          |
| sub-J3qqKYPx97PByMTVJeJKAUV9_7 | 26,514,143 | 149 149                  | -       | sub-UinqmAp16Wo8TJCAMdAsk9WT_7  | 1,343,310  | 150 150                  | -                          |
| sub-KAWuEwoNYZL7voR7ZSkfYF34_1 | 18,576,854 | 149 149                  | -       | sub-UKjbyYzAc76fG6xGqNSfMRH_1   | 20,021,639 | 147 147                  | -                          |
| sub-KAWuEwoNYZL7voR7ZSkfYF34_2 | 23,877,292 | 149 149                  | -       | sub-UKjbyYzAc76fG6xGqNSfMRH_2   | 24,694,745 | 147 147                  | -                          |
| sub-KAWuEwoNYZL7voR7ZSkfYF34_3 | 29,902,282 | 149 149                  | -       | sub-UKjbyYzAc76fG6xGqNSfMRH_3   | 28,769,247 | 148 148                  | -                          |
| sub-KAWuEwoNYZL7voR7ZSkfYF34_4 | 24,908,413 | 149 149                  | -       | sub-UKjbyYzAc76fG6xGqNSfMRH_4   | 25,791,880 | 148 148                  | -                          |
| sub-KAWuEwoNYZL7voR7ZSkfYF34_5 | 32,379,583 | 149 149                  | -       | sub-UKjbyYzAc76fG6xGqNSfMRH_5   | 21,097,119 | 147 147                  | -                          |
| sub-KAWuEwoNYZL7voR7ZSkfYF34_6 | 17,649,937 | 149 149                  | -       | sub-UKjbyYzAc76fG6xGqNSfMRH_6   | 23,064,908 | 148 147                  | -                          |
| sub-KAWuEwoNYZL7voR7ZSkfYF34_7 | 28,576,466 | 149 149                  | -       | sub-UKjbyYzAc76fG6xGqNSfMRH_7   | 21,242,395 | 148 148                  | -                          |



**Supplementary Table S8.** Overview of sequencing data sets generated in this study.

Experiment description: evaluation of the homogeneity of the DNA and cell mock community preparations and precision (between-run variability) of sequencing.

| SRA accession | library ID | BioSample accession | metafield 1                     | metafield 2 | metafield 3 | metafield 4 | read pairs |
|---------------|------------|---------------------|---------------------------------|-------------|-------------|-------------|------------|
| SRR12996255   | PRSRX0934A | SAMN15699795        | aliquot 1                       | replicate 1 | protocol C0 | N/A         | 22,535,131 |
| SRR12996254   | MTZKD2438Z | SAMN15699795        | aliquot 1                       | replicate 2 | protocol C0 | N/A         | 20,481,396 |
| SRR12996253   | USSAV4874U | SAMN15699795        | aliquot 2                       | replicate 1 | protocol C0 | N/A         | 23,178,960 |
| SRR12996252   | GLRVN7807X | SAMN15699795        | aliquot 2                       | replicate 2 | protocol C0 | N/A         | 25,019,800 |
| SRR12996250   | LEYWQ8265B | SAMN15699795        | aliquot 3                       | replicate 1 | protocol C0 | N/A         | 25,988,700 |
| SRR12996249   | NYXYT6131Q | SAMN15699795        | aliquot 3                       | replicate 2 | protocol C0 | N/A         | 18,825,222 |
| SRR12996222   | XMAWC3253E | SAMN15699795        | resequencing library PRSRX0934A | repeat 2    | protocol C0 | N/A         | 7,161,812  |
| SRR12996221   | VUOPT1962L | SAMN15699795        | resequencing library PRSRX0934A | repeat 3    | protocol C0 | N/A         | 6,859,602  |
| SRR12996210   | VDZDY6239P | SAMN15699795        | resequencing library PRSRX0934A | repeat 4    | protocol C0 | N/A         | 6,766,326  |
| SRR12995891   | MEFKO7750R | SAMN15699798        | aliquot 1                       | replicate 1 | protocol C  | protocol BL | 6,775,752  |
| SRR12995890   | JLGF2112D  | SAMN15699798        | aliquot 1                       | replicate 2 | protocol C  | protocol BL | 6,321,733  |
| SRR12995889   | VFULV9519Z | SAMN15699798        | aliquot 2                       | replicate 1 | protocol C  | protocol BL | 5,895,910  |
| SRR12995888   | ZXKQO1496G | SAMN15699798        | aliquot 2                       | replicate 2 | protocol C  | protocol BL | 6,792,133  |
| SRR12995887   | LBSQP1197V | SAMN15699798        | aliquot 3                       | replicate 1 | protocol C  | protocol BL | 6,805,020  |
| SRR12995886   | TPJUP1830J | SAMN15699798        | aliquot 3                       | replicate 2 | protocol C  | protocol BL | 6,158,654  |

**Supplementary Table S8.** Overview of sequencing data sets generated in this study, *continued*.

Experiment description: phase I, comparison of protocols for sequencing library construction.

| SRA accession | library ID | BioSample accession | metafield 1  | metafield 2                                   | metafield 3 | read pairs |
|---------------|------------|---------------------|--------------|-----------------------------------------------|-------------|------------|
| SRR12996245   | YPASQ0509K | SAMN15699795        | protocol A0  | Accel NGS 2S Plus DNA Library Kit             | 500 ng (X0) | 9,290,896  |
| SRR12996244   | XGNLP7038C | SAMN15699795        | protocol A0  | Accel NGS 2S Plus DNA Library Kit             | 500 ng (X0) | 7,924,370  |
| SRR12996243   | JBUIX5568V | SAMN15699795        | protocol A0  | Accel NGS 2S Plus DNA Library Kit             | 500 ng (X0) | 7,534,289  |
| SRR12996216   | MIABL7113W | SAMN15699795        | protocol AH  | Accel NGS 2S Plus DNA Library Kit             | 1 ng (XH)   | 8,998,250  |
| SRR12996215   | KAZRM8350B | SAMN15699795        | protocol AH  | Accel NGS 2S Plus DNA Library Kit             | 1 ng (XH)   | 8,700,895  |
| SRR12996214   | NYXZY9866Z | SAMN15699795        | protocol AH  | Accel NGS 2S Plus DNA Library Kit             | 1 ng (XH)   | 9,132,783  |
| SRR12996213   | OOXIK5486P | SAMN15699795        | protocol AL  | Accel NGS 2S Plus DNA Library Kit             | 50 ng (XL)  | 8,272,566  |
| SRR12996212   | GMTGR1407W | SAMN15699795        | protocol AL  | Accel NGS 2S Plus DNA Library Kit             | 50 ng (XL)  | 8,291,342  |
| SRR12996211   | WDJOT3418B | SAMN15699795        | protocol AL  | Accel NGS 2S Plus DNA Library Kit             | 50 ng (XL)  | 7,700,685  |
| SRR12996177   | ONOLI8203G | SAMN15699795        | protocol B0  | QIAseq FX DNA Library Kit                     | 500 ng (X0) | 5,820,034  |
| SRR12996176   | SSUOU3710N | SAMN15699795        | protocol B0  | QIAseq FX DNA Library Kit                     | 500 ng (X0) | 7,785,985  |
| SRR12996175   | EWUUF5893S | SAMN15699795        | protocol B0  | QIAseq FX DNA Library Kit                     | 500 ng (X0) | 9,694,472  |
| SRR12996184   | EKMKV2003M | SAMN15699795        | protocol BH  | QIAseq FX DNA Library Kit                     | 1 ng (XH)   | 3,666,747  |
| SRR12996182   | IPQGA1889J | SAMN15699795        | protocol BH  | QIAseq FX DNA Library Kit                     | 1 ng (XH)   | 5,648,433  |
| SRR12996181   | WPACG6920A | SAMN15699795        | protocol BH  | QIAseq FX DNA Library Kit                     | 1 ng (XH)   | 5,281,491  |
| SRR12996180   | VZRWH7215I | SAMN15699795        | protocol BL  | QIAseq FX DNA Library Kit                     | 50 ng (XL)  | 3,066,761  |
| SRR12996179   | IEHKK7266N | SAMN15699795        | protocol BL  | QIAseq FX DNA Library Kit                     | 50 ng (XL)  | 3,187,392  |
| SRR12996178   | RINGI6673U | SAMN15699795        | protocol BL  | QIAseq FX DNA Library Kit                     | 50 ng (XL)  | 4,126,250  |
| SRR12996248   | QMBWW8147T | SAMN15699795        | protocol C0  | TruSeq (Nano) DNA (PCR-Free) Library Prep Kit | 500 ng (X0) | 13,770,875 |
| SRR12996247   | CAHHZ8466D | SAMN15699795        | protocol C0  | TruSeq (Nano) DNA (PCR-Free) Library Prep Kit | 500 ng (X0) | 13,842,322 |
| SRR12996246   | HREBM5403X | SAMN15699795        | protocol C0  | TruSeq (Nano) DNA (PCR-Free) Library Prep Kit | 500 ng (X0) | 11,489,517 |
| SRR12996238   | LUF5H1258S | SAMN15699795        | protocol CH  | TruSeq (Nano) DNA (PCR-Free) Library Prep Kit | 1 ng (XH)   | 7,873,064  |
| SRR12996237   | DVJIC2603M | SAMN15699795        | protocol CH  | TruSeq (Nano) DNA (PCR-Free) Library Prep Kit | 1 ng (XH)   | 7,967,612  |
| SRR12996236   | BRFMX1775K | SAMN15699795        | protocol CH  | TruSeq (Nano) DNA (PCR-Free) Library Prep Kit | 1 ng (XH)   | 7,918,419  |
| SRR12996235   | IAGIN2467B | SAMN15699795        | protocol CL  | TruSeq (Nano) DNA (PCR-Free) Library Prep Kit | 50 ng (XL)  | 7,206,326  |
| SRR12996234   | PHKHG5314R | SAMN15699795        | C protocol L | TruSeq (Nano) DNA (PCR-Free) Library Prep Kit | 50 ng (XL)  | 6,064,300  |
| SRR12996233   | ZZFIW8217R | SAMN15699795        | protocol CL  | TruSeq (Nano) DNA (PCR-Free) Library Prep Kit | 50 ng (XL)  | 7,286,053  |
| SRR12996242   | SLVME9773T | SAMN15699795        | protocol D0  | KAPA HTP Library Preparation Kit              | 500 ng (X0) | 16,802,831 |
| SRR12996241   | JVECG4894E | SAMN15699795        | protocol D0  | KAPA HTP Library Preparation Kit              | 500 ng (X0) | 18,117,803 |
| SRR12996239   | PDZEP7730Z | SAMN15699795        | protocol D0  | KAPA HTP Library Preparation Kit              | 500 ng (X0) | 17,702,854 |
| SRR12996209   | NFQSL1672A | SAMN15699795        | protocol DH  | KAPA HTP Library Preparation Kit              | 1 ng (XH)   | 10,142,444 |
| SRR12996208   | MDEZV6571Z | SAMN15699795        | protocol DH  | KAPA HTP Library Preparation Kit              | 1 ng (XH)   | 9,886,743  |
| SRR12996204   | FZWNX0246H | SAMN15699795        | protocol DH  | KAPA HTP Library Preparation Kit              | 1 ng (XH)   | 10,187,551 |
| SRR12996203   | KXSAM6874D | SAMN15699795        | protocol DL  | KAPA HTP Library Preparation Kit              | 50 ng (XL)  | 9,442,022  |
| SRR12996202   | QEZSB6901C | SAMN15699795        | protocol DL  | KAPA HTP Library Preparation Kit              | 50 ng (XL)  | 9,501,456  |
| SRR12996201   | VETOD3091P | SAMN15699795        | protocol DL  | KAPA HTP Library Preparation Kit              | 50 ng (XL)  | 9,534,327  |
| SRR12996200   | AQLAS7207P | SAMN15699795        | protocol E0  | KAPA HyperPrep (PCR-free) Kit                 | 500 ng (X0) | 11,525,380 |
| SRR12996199   | PXSNX2192Y | SAMN15699795        | protocol E0  | KAPA HyperPrep (PCR-free) Kit                 | 500 ng (X0) | 13,320,142 |
| SRR12996198   | XWMSK1794C | SAMN15699795        | protocol E0  | KAPA HyperPrep (PCR-free) Kit                 | 500 ng (X0) | 13,007,529 |
| SRR12996225   | QLMFJ6572R | SAMN15699795        | protocol EH  | KAPA HyperPrep (PCR-free) Kit                 | 1 ng (XH)   | 9,231,695  |
| SRR12996224   | IJUTS6740L | SAMN15699795        | protocol EH  | KAPA HyperPrep (PCR-free) Kit                 | 1 ng (XH)   | 9,089,610  |
| SRR12996223   | DPVUO1574H | SAMN15699795        | protocol EH  | KAPA HyperPrep (PCR-free) Kit                 | 1 ng (XH)   | 10,171,471 |
| SRR12996220   | FQPVZ3967C | SAMN15699795        | protocol EL  | KAPA HyperPrep (PCR-free) Kit                 | 50 ng (XL)  | 9,523,644  |
| SRR12996219   | WEZOA1238R | SAMN15699795        | protocol EL  | KAPA HyperPrep (PCR-free) Kit                 | 50 ng (XL)  | 9,286,968  |
| SRR12996217   | QPQOV1893L | SAMN15699795        | protocol EL  | KAPA HyperPrep (PCR-free) Kit                 | 50 ng (XL)  | 10,168,821 |
| SRR12996154   | WZSND9816K | SAMN15699795        | protocol F0  | KAPA HyperPrep + KAPA Frag                    | 500 ng (X0) | 10,113,254 |
| SRR12996153   | YMZAY7106F | SAMN15699795        | protocol F0  | KAPA HyperPrep + KAPA Frag                    | 500 ng (X0) | 11,125,433 |
| SRR12996152   | OKZVY1505D | SAMN15699795        | protocol F0  | KAPA HyperPrep + KAPA Frag                    | 500 ng (X0) | 11,081,338 |
| SRR12996160   | CVWLS4883I | SAMN15699795        | protocol FH  | KAPA HyperPrep + KAPA Frag                    | 1 ng (XH)   | 7,825,147  |
| SRR12996159   | WYGH12354Y | SAMN15699795        | protocol FH  | KAPA HyperPrep + KAPA Frag                    | 1 ng (XH)   | 7,176,897  |
| SRR12996158   | UHLIK8571P | SAMN15699795        | protocol FH  | KAPA HyperPrep + KAPA Frag                    | 1 ng (XH)   | 8,122,704  |
| SRR12996157   | TXQVM2545E | SAMN15699795        | protocol FL  | KAPA HyperPrep + KAPA Frag                    | 50 ng (XL)  | 7,347,457  |
| SRR12996156   | VYEBW9961P | SAMN15699795        | protocol FL  | KAPA HyperPrep + KAPA Frag                    | 50 ng (XL)  | 7,477,101  |
| SRR12996155   | EAWGW9546V | SAMN15699795        | protocol FL  | KAPA HyperPrep + KAPA Frag                    | 50 ng (XL)  | 7,068,777  |
| SRR12996167   | MFMRH0336X | SAMN15699795        | protocol GH  | KAPA HTP + KAPA Frag                          | 1 ng (XH)   | 7,933,522  |
| SRR12996166   | JEJBM2114H | SAMN15699795        | protocol GH  | KAPA HTP + KAPA Frag                          | 1 ng (XH)   | 7,928,794  |
| SRR12996165   | VTDEF2260K | SAMN15699795        | protocol GH  | KAPA HTP + KAPA Frag                          | 1 ng (XH)   | 7,265,340  |
| SRR12996164   | UIYDC6252L | SAMN15699795        | protocol GL  | KAPA HTP + KAPA Frag                          | 50 ng (XL)  | 8,619,514  |
| SRR12996163   | NKTDI8053X | SAMN15699795        | protocol GL  | KAPA HTP + KAPA Frag                          | 50 ng (XL)  | 8,301,525  |
| SRR12996162   | PXKIM6024D | SAMN15699795        | protocol GL  | KAPA HTP + KAPA Frag                          | 50 ng (XL)  | 7,707,914  |
| SRR12996232   | OYWKV3727D | SAMN15699795        | protocol HH  | NEBNext Ultra II DNA Library Prep Kit         | 1 ng (XH)   | 8,961,646  |
| SRR12996231   | AENUK8978L | SAMN15699795        | protocol HH  | NEBNext Ultra II DNA Library Prep Kit         | 1 ng (XH)   | 8,124,875  |
| SRR12996230   | ZHILX6222J | SAMN15699795        | protocol HH  | NEBNext Ultra II DNA Library Prep Kit         | 1 ng (XH)   | 9,993,106  |
| SRR12996228   | XYWYK0128G | SAMN15699795        | protocol HL  | NEBNext Ultra II DNA Library Prep Kit         | 50 ng (XL)  | 8,945,585  |
| SRR12996227   | NLYBD3171B | SAMN15699795        | protocol HL  | NEBNext Ultra II DNA Library Prep Kit         | 50 ng (XL)  | 9,146,250  |
| SRR12996226   | NTCPN6519G | SAMN15699795        | protocol HL  | NEBNext Ultra II DNA Library Prep Kit         | 50 ng (XL)  | 9,401,620  |
| SRR12996197   | PIMPV2601E | SAMN15699795        | protocol IH  | NEBNext Ultra II FS DNA Library Prep Kit      | 1 ng (XH)   | 10,617,823 |
| SRR12996196   | YGHKA9860M | SAMN15699795        | protocol IH  | NEBNext Ultra II FS DNA Library Prep Kit      | 1 ng (XH)   | 9,269,961  |
| SRR12996195   | ZNASJ4343U | SAMN15699795        | protocol IH  | NEBNext Ultra II FS DNA Library Prep Kit      | 1 ng (XH)   | 11,854,124 |
| SRR12996193   | ADDS7456U  | SAMN15699795        | protocol IL  | NEBNext Ultra II FS DNA Library Prep Kit      | 50 ng (XL)  | 9,800,826  |
| SRR12996192   | LPFIJ8941A | SAMN15699795        | protocol IL  | NEBNext Ultra II FS DNA Library Prep Kit      | 50 ng (XL)  | 10,162,727 |
| SRR12996191   | WPKVD1814M | SAMN15699795        | protocol IL  | NEBNext Ultra II FS DNA Library Prep Kit      | 50 ng (XL)  | 10,607,431 |
| SRR12996190   | YZFKH6948N | SAMN15699795        | protocol JH  | Nextera DNA Flex Library Prep Kit             | 1 ng (XH)   | 3,007,823  |
| SRR12996189   | TUPDT1718K | SAMN15699795        | protocol JH  | Nextera DNA Flex Library Prep Kit             | 1 ng (XH)   | 2,553,249  |
| SRR12996188   | YVZPY7425X | SAMN15699795        | protocol JH  | Nextera DNA Flex Library Prep Kit             | 1 ng (XH)   | 2,966,765  |
| SRR12996187   | VGSEN4896N | SAMN15699795        | protocol JL  | Nextera DNA Flex Library Prep Kit             | 50 ng (XL)  | 8,671,481  |
| SRR12996186   | ZDLTW7915V | SAMN15699795        | protocol JL  | Nextera DNA Flex Library Prep Kit             | 50 ng (XL)  | 2,929,741  |
| SRR12996185   | TNHUX0178E | SAMN15699795        | protocol JL  | Nextera DNA Flex Library Prep Kit             | 50 ng (XL)  | 1,807,446  |
| SRR12996174   | FAQBJ8354O | SAMN15699795        | protocol KH  | SMARTer ThruPLEX DNA-Seq Kit                  | 1 ng (XH)   | 9,300,863  |
| SRR12996173   | RNVRF2397Q | SAMN15699795        | protocol KH  | SMARTer ThruPLEX DNA-Seq Kit                  | 1 ng (XH)   | 7,812,631  |
| SRR12996171   | UDEUH2203G | SAMN15699795        | protocol KH  | SMARTer ThruPLEX DNA-Seq Kit                  | 1 ng (XH)   | 6,161,994  |
| SRR12996170   | VPLW09012T | SAMN15699795        | protocol KL  | SMARTer ThruPLEX DNA-Seq Kit                  | 50 ng (XL)  | 9,342,866  |
| SRR12996169   | OBSBP7633H | SAMN15699795        | protocol KL  | SMARTer ThruPLEX DNA-Seq Kit                  | 50 ng (XL)  | 8,206,503  |

**Supplementary Table S8.** Overview of sequencing data sets generated in this study, *continued*.

Experiment description: phase I, comparison of protocols for DNA extraction.

| SRA accession | library ID | BioSample accession | metafield 1 | metafield 2                                    | metafield 3 | read pairs |
|---------------|------------|---------------------|-------------|------------------------------------------------|-------------|------------|
| SRR12996151   | UMSRP0980H | SAMN15699798        | protocol Q  | QIAmp DNA Stool Mini Kit based IHMS protocol Q | 8x60s       | 7,108,991  |
| SRR12996149   | YMTQS4157I | SAMN15699798        | protocol Q  | QIAmp DNA Stool Mini Kit based IHMS protocol Q | 8x60s       | 4,014,264  |
| SRR12996148   | GZAFM6535A | SAMN15699798        | protocol Q  | QIAmp DNA Stool Mini Kit based IHMS protocol Q | 8x60s       | 4,689,076  |
| SRR12996147   | ASQJZ0615T | SAMN15699798        | protocol N  | ISOSPIN Fecal DNA                              | 1x40s       | 4,657,404  |
| SRR12996146   | ZFOZD8577K | SAMN15699798        | protocol N  | ISOSPIN Fecal DNA                              | 1x40s       | 5,088,964  |
| SRR12996145   | ZIXRR7209C | SAMN15699798        | protocol N  | ISOSPIN Fecal DNA                              | 1x40s       | 4,836,397  |
| SRR12996144   | XBVGF0483S | SAMN15699798        | protocol M  | FastDNA SPIN Kit for Feces                     | 1x40s       | 5,954,069  |
| SRR12996143   | CFYYO4072W | SAMN15699798        | protocol M  | FastDNA SPIN Kit for Feces                     | 1x40s       | 3,718,780  |
| SRR12996142   | YNSEC6940T | SAMN15699798        | protocol M  | FastDNA SPIN Kit for Feces                     | 1x40s       | 7,210,305  |
| SRR12996141   | OUFFT0627P | SAMN15699798        | protocol M  | FastDNA SPIN Kit for Feces                     | 3x40s       | 4,973,562  |
| SRR12996140   | AOSHY0342I | SAMN15699798        | protocol M  | FastDNA SPIN Kit for Feces                     | 3x40s       | 5,121,420  |
| SRR12996138   | CPMBK0854Y | SAMN15699798        | protocol M  | FastDNA SPIN Kit for Feces                     | 3x40s       | 4,655,756  |
| SRR12996137   | MEWDB9259P | SAMN15699798        | protocol R  | MORA-EXTRACT                                   | 1x40s       | 4,363,712  |
| SRR12996136   | NMEVA8208M | SAMN15699798        | protocol R  | MORA-EXTRACT                                   | 1x40s       | 5,040,088  |
| SRR12996135   | GZVVR0204P | SAMN15699798        | protocol R  | MORA-EXTRACT                                   | 1x40s       | 4,247,550  |
| SRR12996134   | TQRYL0596A | SAMN15699798        | protocol L  | Extrap soil DNA kit plus ver.2                 | 1x40s       | 7,467,228  |
| SRR12996133   | AOKIO8210V | SAMN15699798        | protocol L  | Extrap soil DNA kit plus ver.2                 | 1x40s       | 6,305,885  |
| SRR12996132   | YIRIW9357L | SAMN15699798        | protocol L  | Extrap soil DNA kit plus ver.2                 | 1x40s       | 4,500,411  |
| SRR12996131   | SIEGL6439A | SAMN15699798        | protocol P  | in-house phenol/chloroform-based protocol      | 1x40s       | 5,665,735  |
| SRR12996130   | IJBVM4020D | SAMN15699798        | protocol P  | in-house phenol/chloroform-based protocol      | 1x40s       | 5,663,143  |
| SRR12996129   | CKDMD2679G | SAMN15699798        | protocol P  | in-house phenol/chloroform-based protocol      | 1x40s       | 4,673,206  |
| SRR12996127   | GEVLN1207B | SAMN15699798        | protocol T  | Quick DNA Fecal/Soil microbe Miniprep Kit      | 1x40s       | 4,201,699  |
| SRR12996126   | QVEML0140P | SAMN15699798        | protocol T  | Quick DNA Fecal/Soil microbe Miniprep Kit      | 1x40s       | 5,588,747  |
| SRR12996125   | ZIHJD0408J | SAMN15699798        | protocol T  | Quick DNA Fecal/Soil microbe Miniprep Kit      | 1x40s       | 11,280,325 |
| SRR12996124   | MZYVP4154F | SAMN15699798        | protocol S  | QIAmp PowerFecal Pro DNA kit                   | 1x40s       | 4,383,334  |
| SRR12996123   | AODHX9034L | SAMN15699798        | protocol S  | QIAmp PowerFecal Pro DNA kit                   | 1x40s       | 4,149,477  |
| SRR12996122   | NOJBL2122Q | SAMN15699798        | protocol S  | QIAmp PowerFecal Pro DNA kit                   | 1x40s       | 4,292,232  |
| SRR12996121   | WLDSC4184M | SAMN15699798        | protocol O  | MagAttract PowerMicrobiome RNA/DNA EP Kit      | 2x600s      | 5,866,353  |
| SRR12996120   | YNUKA4069O | SAMN15699798        | protocol O  | MagAttract PowerMicrobiome RNA/DNA EP Kit      | 2x600s      | 9,664,487  |
| SRR12996119   | GQHYN1601M | SAMN15699798        | protocol O  | MagAttract PowerMicrobiome RNA/DNA EP Kit      | 2x600s      | 10,329,932 |
| SRR12996081   | GOXWR5015Q | SAMN15699798        | protocol N  | ISOSPIN Fecal DNA                              | 1x60s       | 7,410,632  |
| SRR12996080   | GQAOE1636R | SAMN15699798        | protocol N  | ISOSPIN Fecal DNA                              | 1x60s       | 6,386,218  |
| SRR12996079   | PFMFG5612F | SAMN15699798        | protocol N  | ISOSPIN Fecal DNA                              | 2x60s       | 5,933,342  |
| SRR12996078   | MBMMI0395X | SAMN15699798        | protocol N  | ISOSPIN Fecal DNA                              | 2x60s       | 6,072,355  |
| SRR12996077   | KBKQW6012J | SAMN15699798        | protocol N  | ISOSPIN Fecal DNA                              | 3x60s       | 6,483,516  |
| SRR12996076   | MOBQJ2004F | SAMN15699798        | protocol N  | ISOSPIN Fecal DNA                              | 3x60s       | 7,074,006  |
| SRR12996075   | XPCAG2476N | SAMN15699798        | protocol N  | ISOSPIN Fecal DNA                              | 4x60s       | 6,147,536  |
| SRR12996074   | ZVZBB6475A | SAMN15699798        | protocol N  | ISOSPIN Fecal DNA                              | 4x60s       | 7,042,274  |
| SRR12996073   | MCTLD3828W | SAMN15699798        | protocol S  | QIAmp PowerFecal Pro DNA kit                   | 1x60s       | 7,799,519  |
| SRR12996071   | FBPBG5503Y | SAMN15699798        | protocol S  | QIAmp PowerFecal Pro DNA kit                   | 1x60s       | 5,531,082  |
| SRR12996070   | ZFFJN1274Y | SAMN15699798        | protocol S  | QIAmp PowerFecal Pro DNA kit                   | 2x60s       | 6,447,932  |
| SRR12996069   | ROWML0997A | SAMN15699798        | protocol S  | QIAmp PowerFecal Pro DNA kit                   | 2x60s       | 7,520,382  |
| SRR12996068   | TBJBQ6296R | SAMN15699798        | protocol S  | QIAmp PowerFecal Pro DNA kit                   | 3x60s       | 7,515,070  |
| SRR12996067   | XPEWO8425V | SAMN15699798        | protocol S  | QIAmp PowerFecal Pro DNA kit                   | 3x60s       | 7,327,786  |
| SRR12996066   | DGCIH3470D | SAMN15699798        | protocol S  | QIAmp PowerFecal Pro DNA kit                   | 4x60s       | 6,632,018  |
| SRR12996065   | GRNLA6285L | SAMN15699798        | protocol S  | QIAmp PowerFecal Pro DNA kit                   | 4x60s       | 5,335,760  |
| SRR12996064   | EDNVV5248B | SAMN15699798        | protocol L  | Extrap soil DNA kit plus ver.2                 | 1x60s       | 5,278,333  |
| SRR12996063   | OZQHT2906R | SAMN15699798        | protocol L  | Extrap soil DNA kit plus ver.2                 | 1x60s       | 6,102,972  |
| SRR12996062   | DMQCW2387A | SAMN15699798        | protocol L  | Extrap soil DNA kit plus ver.2                 | 2x60s       | 5,181,573  |
| SRR12996060   | BHFPP3392H | SAMN15699798        | protocol L  | Extrap soil DNA kit plus ver.2                 | 2x60s       | 4,997,703  |
| SRR12996059   | BOYIA0312C | SAMN15699798        | protocol L  | Extrap soil DNA kit plus ver.2                 | 3x60s       | 4,537,694  |
| SRR12996058   | VJJAX0426M | SAMN15699798        | protocol L  | Extrap soil DNA kit plus ver.2                 | 3x60s       | 4,943,826  |
| SRR12996057   | EGRIC4067N | SAMN15699798        | protocol L  | Extrap soil DNA kit plus ver.2                 | 4x60s       | 5,448,457  |
| SRR12996056   | RLUBS0231Y | SAMN15699798        | protocol L  | Extrap soil DNA kit plus ver.2                 | 4x60s       | 6,033,541  |

**Supplementary Table S8.** Overview of sequencing data sets generated in this study, *continued*.

Experiment description: phase I, comparison of protocols for DNA extraction.

| SRA accession | library ID | BioSample accession | metafield 1 | metafield 2                                    | metafield 3 | read pairs <sup>a</sup> |
|---------------|------------|---------------------|-------------|------------------------------------------------|-------------|-------------------------|
| SRR12996055   | YWUVP8943Y | SAMN15699786        | protocol N  | ISOSPIN Fecal DNA                              | 1x60s       | 5,957,688               |
| SRR12996054   | KFVKY0109G | SAMN15699786        | protocol N  | ISOSPIN Fecal DNA                              | 1x60s       | 5,815,146               |
| SRR12996053   | DTSLA7164L | SAMN15699786        | protocol N  | ISOSPIN Fecal DNA                              | 2x60s       | 4,533,686               |
| SRR12996052   | GMIFJ4899N | SAMN15699786        | protocol N  | ISOSPIN Fecal DNA                              | 2x60s       | 5,348,611               |
| SRR12996051   | OEPQJ0302L | SAMN15699786        | protocol N  | ISOSPIN Fecal DNA                              | 3x60s       | 4,374,135               |
| SRR12996049   | HDZGC1853W | SAMN15699786        | protocol N  | ISOSPIN Fecal DNA                              | 3x60s       | 4,699,862               |
| SRR12996048   | WRNCL4128T | SAMN15699786        | protocol N  | ISOSPIN Fecal DNA                              | 4x60s       | 4,805,527               |
| SRR12996047   | PJHGN8994W | SAMN15699786        | protocol N  | ISOSPIN Fecal DNA                              | 4x60s       | 9,964,360               |
| SRR12996046   | VLPBF9005Z | SAMN15699786        | protocol S  | QIAmp PowerFecal Pro DNA kit                   | 1x60s       | 4,538,217               |
| SRR12996045   | IZDPO9942G | SAMN15699786        | protocol S  | QIAmp PowerFecal Pro DNA kit                   | 1x60s       | 4,505,115               |
| SRR12996044   | BJAPB8482P | SAMN15699786        | protocol S  | QIAmp PowerFecal Pro DNA kit                   | 2x60s       | 4,032,227               |
| SRR12996043   | XRDUO9845R | SAMN15699786        | protocol S  | QIAmp PowerFecal Pro DNA kit                   | 2x60s       | 3,624,647               |
| SRR12996042   | KFAIW9232M | SAMN15699786        | protocol S  | QIAmp PowerFecal Pro DNA kit                   | 3x60s       | 4,429,560               |
| SRR12996041   | FLFAY2943S | SAMN15699786        | protocol S  | QIAmp PowerFecal Pro DNA kit                   | 3x60s       | 4,647,732               |
| SRR12996040   | MTDLX0365K | SAMN15699786        | protocol S  | QIAmp PowerFecal Pro DNA kit                   | 4x60s       | 4,699,968               |
| SRR12996038   | ARCDE2885O | SAMN15699786        | protocol S  | QIAmp PowerFecal Pro DNA kit                   | 4x60s       | 5,496,497               |
| SRR12996037   | SKGZX1334H | SAMN15699786        | protocol L  | Extrap soil DNA kit plus ver.2                 | 1x60s       | 4,013,247               |
| SRR12996036   | WIYLN4124D | SAMN15699786        | protocol L  | Extrap soil DNA kit plus ver.2                 | 1x60s       | 6,633,152               |
| SRR12996035   | LWIEJ9832I | SAMN15699786        | protocol L  | Extrap soil DNA kit plus ver.2                 | 2x60s       | 5,778,107               |
| SRR12996034   | LEYTL5128O | SAMN15699786        | protocol L  | Extrap soil DNA kit plus ver.2                 | 2x60s       | 4,240,473               |
| SRR12996033   | JJPVQ5578G | SAMN15699786        | protocol L  | Extrap soil DNA kit plus ver.2                 | 3x60s       | 5,513,047               |
| SRR12996032   | RXNQP0432B | SAMN15699786        | protocol L  | Extrap soil DNA kit plus ver.2                 | 3x60s       | 4,438,872               |
| SRR12996031   | JIQTH3662E | SAMN15699786        | protocol L  | Extrap soil DNA kit plus ver.2                 | 4x60s       | 4,212,387               |
| SRR12996030   | YXVZN6388Z | SAMN15699786        | protocol L  | Extrap soil DNA kit plus ver.2                 | 4x60s       | 6,410,810               |
| SRR12995994   | YXGIW9531V | SAMN15699786        | protocol Q  | QIAmp DNA Stool Mini Kit based IHMS protocol Q | 8x60s       | 4,200,618               |
| SRR12995993   | VIOIA6564K | SAMN15699786        | protocol Q  | QIAmp DNA Stool Mini Kit based IHMS protocol Q | 8x60s       | 4,136,112               |

<sup>(a)</sup> Represents the number of reads after quality filtering using fastp and removal of human genomic reads using BMTagger.

**Supplementary Table S8.** Overview of sequencing data sets generated in this study, *continued*.

Experiment description: phase II, intermediate precision of SOP for sequencing library construction.

| SRA accession | library ID | BioSample accession | metafield 1 | metafield 2 | metafield 3 | read pairs |
|---------------|------------|---------------------|-------------|-------------|-------------|------------|
| SRR12996118   | BSTQN9003B | SAMN15699795        | protocol B0 | operator03  | lotLA       | 6,082,751  |
| SRR12996116   | HTGTC2841E | SAMN15699795        | protocol B0 | operator03  | lotLA       | 5,256,743  |
| SRR12996115   | KUNME6128A | SAMN15699795        | protocol B0 | operator03  | lotLB       | 5,247,177  |
| SRR12996114   | QHYWA2245M | SAMN15699795        | protocol B0 | operator03  | lotLB       | 5,180,690  |
| SRR12996113   | TQLYA9800H | SAMN15699795        | protocol B0 | operator04  | lotLA       | 5,703,169  |
| SRR12996112   | BCYM26298D | SAMN15699795        | protocol B0 | operator04  | lotLA       | 6,366,432  |
| SRR12996111   | EHHNW3508Z | SAMN15699795        | protocol B0 | operator05  | lotLB       | 6,196,599  |
| SRR12996110   | QVLF7006F  | SAMN15699795        | protocol B0 | operator05  | lotLB       | 3,455,293  |
| SRR12996109   | DGH7T7151W | SAMN15699795        | protocol BH | operator03  | lotLA       | 2,946,804  |
| SRR12996108   | NRVAA2046L | SAMN15699795        | protocol BH | operator03  | lotLA       | 4,273,518  |
| SRR12996107   | TNVCT9086M | SAMN15699795        | protocol BH | operator03  | lotLB       | 4,022,006  |
| SRR12996105   | GAXHJ7700V | SAMN15699795        | protocol BH | operator03  | lotLB       | 4,169,714  |
| SRR12996104   | SHPTG6381O | SAMN15699795        | protocol BH | operator04  | lotLA       | 4,261,992  |
| SRR12996103   | ZEXNA3782R | SAMN15699795        | protocol BH | operator04  | lotLA       | 3,781,585  |
| SRR12996102   | QTGZX4886M | SAMN15699795        | protocol BH | operator05  | lotLB       | 4,422,846  |
| SRR12996101   | CYHWH0365H | SAMN15699795        | protocol BH | operator05  | lotLB       | 4,690,790  |
| SRR12996100   | WLRRN4683J | SAMN15699795        | protocol KL | operator03  | lotLA       | 4,861,637  |
| SRR12996099   | ZTGQV9613B | SAMN15699795        | protocol KL | operator03  | lotLA       | 4,725,636  |
| SRR12996098   | GGMFN2261P | SAMN15699795        | protocol KL | operator03  | lotLB       | 4,971,535  |
| SRR12996097   | MPFUY5926M | SAMN15699795        | protocol KL | operator03  | lotLB       | 4,825,505  |
| SRR12996096   | UGIGX6437I | SAMN15699795        | protocol KL | operator04  | lotLA       | 4,531,911  |
| SRR12996093   | GFCGT0046P | SAMN15699795        | protocol KL | operator04  | lotLA       | 4,774,741  |
| SRR12996092   | TATDW9143D | SAMN15699795        | protocol KL | operator05  | lotLB       | 10,438,487 |
| SRR12996091   | LLSSCG214G | SAMN15699795        | protocol KL | operator05  | lotLB       | 13,617,295 |
| SRR12996090   | LAUVU6210Y | SAMN15699795        | protocol KH | operator03  | lotLA       | 4,868,437  |
| SRR12996089   | FKEVP9367J | SAMN15699795        | protocol KH | operator03  | lotLA       | 3,532,679  |
| SRR12996088   | NTFBT1792N | SAMN15699795        | protocol KH | operator03  | lotLB       | 4,684,706  |
| SRR12996087   | TOSLN9315H | SAMN15699795        | protocol KH | operator03  | lotLB       | 4,376,207  |
| SRR12996086   | SWZVA0299T | SAMN15699795        | protocol KH | operator04  | lotLA       | 5,077,472  |
| SRR12996085   | ZYDUO5250N | SAMN15699795        | protocol KH | operator04  | lotLA       | 5,214,915  |
| SRR12996084   | VOTUQ3740M | SAMN15699795        | protocol KH | operator05  | lotLB       | 13,358,608 |
| SRR12996082   | LPFOU8828M | SAMN15699795        | protocol KH | operator05  | lotLB       | 4,938,281  |
| SRR12995885   | EPLGQ4076C | SAMN15699795        | protocol BL | operator02  | lotLA       | 6,138,184  |
| SRR12995883   | RHPHR9481N | SAMN15699795        | protocol BL | operator02  | lotLA       | 6,649,620  |
| SRR12995882   | RHDFZ6719S | SAMN15699795        | protocol BL | operator02  | lotLA       | 6,749,177  |
| SRR12995881   | KALQB4368Y | SAMN15699795        | protocol BL | operator02  | lotLB       | 5,999,022  |
| SRR12995880   | ZSWVQ6180M | SAMN15699795        | protocol BL | operator02  | lotLB       | 5,971,961  |
| SRR12995879   | WGZOZ6158E | SAMN15699795        | protocol BL | operator02  | lotLB       | 6,548,407  |
| SRR12995878   | NTXUW5961P | SAMN15699795        | protocol BL | operator01  | lotLA       | 6,822,646  |
| SRR12995877   | DTBXH2248I | SAMN15699795        | protocol BL | operator01  | lotLA       | 6,510,923  |
| SRR12995876   | BRIBF9522J | SAMN15699795        | protocol BL | operator01  | lotLA       | 6,030,151  |
| SRR12995875   | FQDQL2727I | SAMN15699795        | protocol BL | operator03  | lotLB       | 5,585,902  |
| SRR12995874   | FLYVT2013F | SAMN15699795        | protocol BL | operator03  | lotLB       | 6,817,860  |
| SRR12996330   | QUTAP9744N | SAMN15699795        | protocol BL | operator03  | lotLB       | 6,184,547  |

**Supplementary Table S8.** Overview of sequencing data sets generated in this study, *continued*.

Experiment description: phase II, intermediate precision of SOP for DNA extraction.

| SRA accession | library ID | BioSample accession | metafield 1 | metafield 2 | metafield 3 | read pairs <sup>a</sup> |
|---------------|------------|---------------------|-------------|-------------|-------------|-------------------------|
| SRR12996029   | AIGK00991S | SAMN15699798        | protocol N  | operator02  | lotLA       | 4,810,741               |
| SRR12996027   | BREPU1754Z | SAMN15699798        | protocol N  | operator02  | lotLA       | 4,656,599               |
| SRR12996026   | MQRDV1049C | SAMN15699798        | protocol N  | operator02  | lotLB       | 4,796,068               |
| SRR12996025   | DNCHK1414K | SAMN15699798        | protocol N  | operator02  | lotLB       | 4,296,323               |
| SRR12996024   | JARDL6168V | SAMN15699798        | protocol N  | operator01  | lotLA       | 5,336,502               |
| SRR12996023   | VSUKT5351G | SAMN15699798        | protocol N  | operator01  | lotLA       | 4,611,111               |
| SRR12996022   | RCLHA3850I | SAMN15699798        | protocol N  | operator03  | lotLB       | 4,218,789               |
| SRR12996021   | BJSOI3318J | SAMN15699798        | protocol N  | operator03  | lotLB       | 4,684,218               |
| SRR12996020   | UJRRG9052S | SAMN15699786        | protocol N  | operator02  | lotLA       | 4,545,345               |
| SRR12996019   | FHPLO7597Z | SAMN15699786        | protocol N  | operator02  | lotLA       | 5,277,012               |
| SRR12996018   | LSXQY2856U | SAMN15699786        | protocol N  | operator02  | lotLB       | 4,230,081               |
| SRR12996016   | DOTWR8396Z | SAMN15699786        | protocol N  | operator02  | lotLB       | 4,120,061               |
| SRR12996015   | HCAXY4772M | SAMN15699786        | protocol N  | operator01  | lotLA       | 4,730,268               |
| SRR12996014   | RLHXK7377U | SAMN15699786        | protocol N  | operator01  | lotLA       | 4,273,669               |
| SRR12996013   | UNGHN7449K | SAMN15699786        | protocol N  | operator03  | lotLB       | 4,151,683               |
| SRR12996012   | OAIYZ5345N | SAMN15699786        | protocol N  | operator03  | lotLB       | 4,283,747               |

<sup>(a)</sup> Represents the number of reads after quality filtering using fastp and removal of human genomic reads using BMTagger.

**Supplementary Table S8.** Overview of sequencing data sets generated in this study, *continued*.

Experiment description: phase II, evaluation of interlaboratory reproducibility of DNA extraction, sequencing at central laboratory.

| SRA accession | library ID | BioSample accession | metafield 1     | metafield 2   | read pairs <sup>a</sup> |
|---------------|------------|---------------------|-----------------|---------------|-------------------------|
| SRR12995948   | WABDO0924F | SAMN15699798        | SOP, protocol N | participant B | 10,311,559              |
| SRR12995947   | RWVZL0907I | SAMN15699798        | SOP, protocol N | participant B | 8,966,932               |
| SRR12995944   | TMJYK2442Z | SAMN15699798        | SOP, protocol N | participant A | 7,588,330               |
| SRR12995943   | VQBKV1974H | SAMN15699798        | SOP, protocol N | participant A | 7,129,379               |
| SRR12995940   | RQXEC8570G | SAMN15699798        | SOP, protocol N | participant C | 7,355,961               |
| SRR12995938   | DTJPB2970M | SAMN15699798        | SOP, protocol N | participant C | 8,644,593               |
| SRR12995935   | KEHKC1228G | SAMN15699798        | SOP, protocol N | participant D | 8,536,691               |
| SRR12995934   | ATAVE8334Z | SAMN15699798        | SOP, protocol N | participant D | 9,543,363               |
| SRR12995931   | UJXV1823D  | SAMN15699798        | SOP, protocol N | participant E | 10,270,585              |
| SRR12995930   | KNLLC2446A | SAMN15699798        | SOP, protocol N | participant E | 8,323,900               |
| SRR12995926   | ATYMI5294H | SAMN15699798        | SOP, protocol N | participant F | 6,465,232               |
| SRR12995925   | IHNRY1739N | SAMN15699798        | SOP, protocol N | participant F | 7,162,489               |
| SRR12995922   | EJBM19924U | SAMN15699798        | SOP, protocol N | participant G | 7,408,969               |
| SRR12995921   | HIED9440W  | SAMN15699798        | SOP, protocol N | participant G | 7,295,171               |
| SRR12995909   | VGSFV5166T | SAMN15699798        | SOP, protocol N | participant H | 7,991,366               |
| SRR12995908   | EWHJE9040S | SAMN15699798        | SOP, protocol N | participant H | 7,828,851               |
| SRR12995904   | HALOF4969M | SAMN15699798        | SOP, protocol N | participant I | 7,999,324               |
| SRR12995903   | YEDUY1294I | SAMN15699798        | SOP, protocol N | participant I | 7,897,182               |
| SRR12995900   | ZRETT9751I | SAMN15699798        | SOP, protocol N | participant J | 6,659,704               |
| SRR12995899   | FZQMY3335Z | SAMN15699798        | SOP, protocol N | participant J | 7,798,145               |
| SRR12996329   | ZYNNG0310D | SAMN15699798        | custom protocol | participant X | 8,683,955               |
| SRR12996323   | AKAVR7329K | SAMN15699798        | custom protocol | participant Y | 7,390,323               |
| SRR12996316   | JCMSQ7032W | SAMN15699798        | custom protocol | participant Z | 7,117,949               |
| SRR12995946   | ZKVG82111H | SAMN15699786        | SOP, protocol N | participant B | 6,342,825               |
| SRR12995945   | OIWFA5304H | SAMN15699786        | SOP, protocol N | participant B | 4,861,231               |
| SRR12995942   | RGHFL7941S | SAMN15699786        | SOP, protocol N | participant A | 12,773,847              |
| SRR12995941   | WRCST3409W | SAMN15699786        | SOP, protocol N | participant A | 6,267,641               |
| SRR12995937   | TTXRG9536D | SAMN15699786        | SOP, protocol N | participant C | 6,130,330               |
| SRR12995936   | FYLUD8222Z | SAMN15699786        | SOP, protocol N | participant C | 7,866,506               |
| SRR12995933   | FZJFT5976J | SAMN15699786        | SOP, protocol N | participant D | 6,437,984               |
| SRR12995932   | WAWCF1743N | SAMN15699786        | SOP, protocol N | participant D | 5,569,805               |
| SRR12995929   | CYWOJ1520P | SAMN15699786        | SOP, protocol N | participant E | 8,260,909               |
| SRR12995927   | NVAFE4837E | SAMN15699786        | SOP, protocol N | participant E | 5,593,399               |
| SRR12995924   | MZLXM1673O | SAMN15699786        | SOP, protocol N | participant F | 6,484,020               |
| SRR12995923   | WVNN05035A | SAMN15699786        | SOP, protocol N | participant F | 9,002,565               |
| SRR12995920   | UYQDB7695P | SAMN15699786        | SOP, protocol N | participant G | 5,413,289               |
| SRR12995919   | VLMUF8356J | SAMN15699786        | SOP, protocol N | participant G | 5,429,593               |
| SRR12995907   | RCFSM7922K | SAMN15699786        | SOP, protocol N | participant H | 7,885,270               |
| SRR12995905   | HLRDB2907E | SAMN15699786        | SOP, protocol N | participant H | 6,640,917               |
| SRR12995902   | GXDNI6943S | SAMN15699786        | SOP, protocol N | participant I | 7,066,269               |
| SRR12995901   | RYGZC0889D | SAMN15699786        | SOP, protocol N | participant I | 7,572,322               |
| SRR12995898   | MEHCW7085V | SAMN15699786        | SOP, protocol N | participant J | 6,200,558               |
| SRR12995897   | XDJF7756P  | SAMN15699786        | SOP, protocol N | participant J | 5,858,436               |
| SRR12996328   | ESQMQ1093L | SAMN15699786        | custom protocol | participant X | 6,196,835               |
| SRR12996322   | KVUCR1822O | SAMN15699786        | custom protocol | participant Y | 7,787,135               |
| SRR12996315   | VKKOS6176H | SAMN15699786        | custom protocol | participant Z | 6,124,431               |

<sup>(a)</sup> Represents the number of reads after quality filtering using fastp and removal of human genomic reads using BMTagger for human fecal samples.

**Supplementary Table S8.** Overview of sequencing data sets generated in this study, *continued*.

Experiment description: phase II, evaluation of interlaboratory reproducibility of library construction, centralized and de-centralized sequencing.

| SRA accession | library ID | BioSample accession | comment                                | metafield 1 | metafield 2 | metafield 3   | read pairs |
|---------------|------------|---------------------|----------------------------------------|-------------|-------------|---------------|------------|
| SRR12995918   | PMWWX7931G | SAMN15699795        | sequencing at central laboratory       | protocol BL | NextSeq     | participant A | 8,976,686  |
| SRR12995916   | XGFOA3403V | SAMN15699795        | sequencing at central laboratory       | protocol BL | NextSeq     | participant A | 9,141,367  |
| SRR12995913   | RXRZN2443W | SAMN15699795        | sequencing at central laboratory       | protocol BL | NextSeq     | participant G | 8,317,429  |
| SRR12995912   | JHAOB7730R | SAMN15699795        | sequencing at central laboratory       | protocol BL | NextSeq     | participant G | 7,600,333  |
| SRR12995896   | QJPSA6625N | SAMN15699795        | sequencing at central laboratory       | protocol BL | NextSeq     | participant B | 7,954,891  |
| SRR12995894   | EOGNZ8674Y | SAMN15699795        | sequencing at central laboratory       | protocol BL | NextSeq     | participant B | 8,563,310  |
| SRR12995893   | WZGYR2679O | SAMN15699795        | sequencing at central laboratory       | protocol BL | NextSeq     | participant H | 7,515,370  |
| SRR12995892   | RYGLM0197P | SAMN15699795        | sequencing at central laboratory       | protocol BL | NextSeq     | participant H | 8,362,936  |
| SRR12996207   | MXIMY6427O | SAMN15699795        | sequencing at participant's laboratory | protocol BL | NextSeq     | participant A | 12,922,997 |
| SRR12996206   | YHTLQ6589U | SAMN15699795        | sequencing at participant's laboratory | protocol BL | NextSeq     | participant A | 11,055,206 |
| SRR12996295   | WQBQG7285P | SAMN15699795        | sequencing at participant's laboratory | protocol BL | NovaSeq     | participant G | 43,801,210 |
| SRR12996293   | WPRTX2513P | SAMN15699795        | sequencing at participant's laboratory | protocol BL | NovaSeq     | participant G | 36,544,086 |
| SRR12996287   | HSKPA1111Y | SAMN15699795        | sequencing at participant's laboratory | protocol BL | NextSeq     | participant B | 12,260,151 |
| SRR12996276   | KWZGX5541H | SAMN15699795        | sequencing at participant's laboratory | protocol BL | NextSeq     | participant B | 11,511,547 |
| SRR12995983   | GWFSG5897X | SAMN15699795        | sequencing at participant's laboratory | protocol BL | NextSeq     | participant H | 12,599,277 |
| SRR12995972   | QMIVB9612B | SAMN15699795        | sequencing at participant's laboratory | protocol BL | NextSeq     | participant H | 11,320,943 |



**Supplementary Table S8.** Overview of sequencing data sets generated in this study, *continued*.

Experiment description: phase II, evaluation of interlaboratory reproducibility, externally generated sequencing data.

| SRA accession | library ID | BioSample accession | metafield 1                   | metafield 2 | metafield 3   | read pairs <sup>a</sup> |
|---------------|------------|---------------------|-------------------------------|-------------|---------------|-------------------------|
| SRR12996229   | ANGBX9820C | SAMN15699786        | SOP, protocol N + protocol BL | NextSeq     | participant A | 11,301,377              |
| SRR12996218   | ZRKZL8955B | SAMN15699786        | SOP, protocol N + protocol BL | NextSeq     | participant A | 10,868,076              |
| SRR12996205   | JOSEO9921H | SAMN15699787        | SOP, protocol N + protocol BL | NextSeq     | participant A | 10,110,273              |
| SRR12996194   | KFKDT9009E | SAMN15699787        | SOP, protocol N + protocol BL | NextSeq     | participant A | 11,777,944              |
| SRR12996183   | ZXHW1122G  | SAMN15699788        | SOP, protocol N + protocol BL | NextSeq     | participant A | 10,492,271              |
| SRR12996172   | CEEU7387Z  | SAMN15699788        | SOP, protocol N + protocol BL | NextSeq     | participant A | 9,914,289               |
| SRR12996161   | UADNC2804K | SAMN15699790        | SOP, protocol N + protocol BL | NextSeq     | participant A | 10,850,366              |
| SRR12996150   | KYQDO6191J | SAMN15699790        | SOP, protocol N + protocol BL | NextSeq     | participant A | 12,555,300              |
| SRR12996139   | YYUDB1506I | SAMN15699792        | SOP, protocol N + protocol BL | NextSeq     | participant A | 10,215,600              |
| SRR12996128   | AWJCU2905O | SAMN15699792        | SOP, protocol N + protocol BL | NextSeq     | participant A | 9,811,892               |
| SRR12995961   | IREFK2660B | SAMN15699786        | SOP, protocol N + protocol BL | NextSeq     | participant H | 10,858,218              |
| SRR12995950   | BHJNY0431U | SAMN15699786        | SOP, protocol N + protocol BL | NextSeq     | participant H | 10,281,811              |
| SRR12995939   | IKEAP7919B | SAMN15699787        | SOP, protocol N + protocol BL | NextSeq     | participant H | 10,444,678              |
| SRR12995928   | BDBNB3719L | SAMN15699787        | SOP, protocol N + protocol BL | NextSeq     | participant H | 10,465,135              |
| SRR12995917   | XNTWA2725M | SAMN15699788        | SOP, protocol N + protocol BL | NextSeq     | participant H | 11,578,595              |
| SRR12995906   | MFCBT5445R | SAMN15699788        | SOP, protocol N + protocol BL | NextSeq     | participant H | 10,933,311              |
| SRR12995895   | QPFGR0377T | SAMN15699790        | SOP, protocol N + protocol BL | NextSeq     | participant H | 10,704,919              |
| SRR12995884   | VTWUF8642A | SAMN15699790        | SOP, protocol N + protocol BL | NextSeq     | participant H | 11,034,716              |
| SRR12995872   | BNGFT5521W | SAMN15699792        | SOP, protocol N + protocol BL | NextSeq     | participant H | 10,545,001              |
| SRR12996320   | ZZDCI3118C | SAMN15699792        | SOP, protocol N + protocol BL | NextSeq     | participant H | 10,761,253              |
| SRR12996266   | BIQAZ9448F | SAMN15699786        | SOP, protocol N + protocol BL | NextSeq     | participant B | 9,113,166               |
| SRR12996265   | DSZQE7617U | SAMN15699786        | SOP, protocol N + protocol BL | NextSeq     | participant B | 11,568,775              |
| SRR12996264   | KQGYU2770E | SAMN15699787        | SOP, protocol N + protocol BL | NextSeq     | participant B | 10,619,824              |
| SRR12996263   | UZJDU9681M | SAMN15699787        | SOP, protocol N + protocol BL | NextSeq     | participant B | 10,658,483              |
| SRR12996261   | EPPAU1110G | SAMN15699788        | SOP, protocol N + protocol BL | NextSeq     | participant B | 5,743,969               |
| SRR12996260   | VEXTL8309O | SAMN15699788        | SOP, protocol N + protocol BL | NextSeq     | participant B | 8,651,921               |
| SRR12996259   | PKWYB6370Y | SAMN15699790        | SOP, protocol N + protocol BL | NextSeq     | participant B | 11,605,019              |
| SRR12996258   | YZZVL8708E | SAMN15699790        | SOP, protocol N + protocol BL | NextSeq     | participant B | 10,565,429              |
| SRR12996257   | FECWJ6257P | SAMN15699792        | SOP, protocol N + protocol BL | NextSeq     | participant B | 10,741,726              |
| SRR12996256   | BPELE2373Q | SAMN15699792        | SOP, protocol N + protocol BL | NextSeq     | participant B | 9,812,153               |
| SRR12996286   | BOCVG1170S | SAMN15699786        | SOP, protocol N + protocol BL | NovaSeq     | participant G | 35,066,238              |
| SRR12996284   | YCTZX5304X | SAMN15699786        | SOP, protocol N + protocol BL | NovaSeq     | participant G | 38,715,143              |
| SRR12996282   | XSCNG2308K | SAMN15699787        | SOP, protocol N + protocol BL | NovaSeq     | participant G | 32,246,802              |
| SRR12996280   | SFALK7272X | SAMN15699787        | SOP, protocol N + protocol BL | NovaSeq     | participant G | 40,156,839              |
| SRR12996278   | AHQJU9427M | SAMN15699788        | SOP, protocol N + protocol BL | NovaSeq     | participant G | 36,059,125              |
| SRR12996275   | PRNIF2521D | SAMN15699788        | SOP, protocol N + protocol BL | NovaSeq     | participant G | 39,312,556              |
| SRR12996273   | QSQWY8216Z | SAMN15699790        | SOP, protocol N + protocol BL | NovaSeq     | participant G | 36,084,757              |
| SRR12996271   | GFIPN6743M | SAMN15699790        | SOP, protocol N + protocol BL | NovaSeq     | participant G | 39,992,317              |
| SRR12996269   | INBPJ2435S | SAMN15699792        | SOP, protocol N + protocol BL | NovaSeq     | participant G | 39,243,168              |
| SRR12996267   | CUCBE9450U | SAMN15699792        | SOP, protocol N + protocol BL | NovaSeq     | participant G | 40,892,764              |

<sup>(a)</sup> Represents the number of reads after quality filtering using fastp and removal of human genomic reads using BMTagger for human fecal samples.

## Supplementary references

- Satterthwaite FE. 1946. An approximate distribution of estimates of variance components. *Biometrics Bulletin*. 2(6):110–114.
- Pawlowsky-Glahn V, Egozcue JJ, Tolosano-Delgado R. 2007. Lecture notes on compositional data analysis, <http://hdl.handle.net/10256/297>.
- Aitchison J. *The statistical analysis of compositional data*. Chapman and Hall, London, UK, 1986.
- van den Boogaart KG, Tolosana-Delgado R, Bren M. 2020. *compositions: Compositional Data Analysis*. R package version 2.0-0. <https://CRAN.R-project.org/package=compositions>
- Welch BL. 1947. The generalisation of student's problems when several different population variances are involved. *Biometrika*. 34(1-2):28-35.
- Wick RR, Judd LM, Gorrie CL, Holt, KE. 2017. Unicycler: Resolving bacterial genome assemblies from short and long sequencing reads. *PLoS Comput Biol* 13(6):e1005595.
- Koren S, Walenz BP, Berlin K, Miller JR, Bergman NH, Phillippy AM. 2017. Canu: scalable and accurate long-read assembly via adaptive k-mer weighting and repeat separation. *Genome Res* 27(5):722-736.
- Parks DH, Imelfort M, Skennerton CT, Hugenholtz P, Tyson GW. 2015. CheckM: assessing the quality of microbial genomes recovered from isolates, single cells, and metagenomes. *Genome Res* 25(7):1043-1055.
- Tourlousse DM, Sakamoto M, Miura T, Narita K, Ohashi A, Uchino Y, Yamazoe A, Kameyama K, Terauchi J, Ohkuma M, Kawasaki H, Sekiguchi Y. 2020a. Complete Genome Sequence of *Collinsella aerofaciens* JCM 10188T. *Microbiol Resour Announc* 9(16):e00134-20.
- Tourlousse DM, Sakamoto M, Miura T, Narita K, Ohashi A, Uchino Y, Yamazoe A, Kameyama K, Terauchi J, Ohkuma M, Kawasaki H, Sekiguchi Y. 2020b. Complete Genome Sequence of *Blautia producta* JCM 1471T. *Microbiol Resour Announc*. 9(17):e00141-20.
- Tourlousse DM, Sakamoto M, Miura T, Narita K, Ohashi A, Uchino Y, Yamazoe A, Kameyama K, Terauchi J, Ohkuma M, Kawasaki H, Sekiguchi Y. 2020c. Complete Genome Sequence of *Megamonas funiformis* JCM 14723T. *Microbiol Resour Announc* 9(16):e00142-20.
- Tourlousse DM, Sakamoto M, Miura T, Narita K, Ohashi A, Uchino Y, Yamazoe A, Kameyama K, Terauchi J, Ohkuma M, Kawasaki H, Sekiguchi Y. 2020d. Complete Genome Sequence of *Flavonifractor plautii* JCM 32125T. *Microbiol Resour Announc*. 9(17):e00135-20.
